# Supplementary material for: StuA-Regulated Processes in the Dermatophyte Trichophyton rubrum: Transcription Profile, Cell-Cell Adhesion, and Immunomodulation
Source: PubMed Central journal article supplement (PMC8218993; doi:10.3389/fcimb.2021.643659), 2021-06-08
Supplement: DataSheet_1.pdf [file DataSheet_1.pdf]

## *Supplementary Material*

### **StuA-regulated processes in the dermatophyte *Trichophyton rubrum*: transcription profile, cell-cell adhesion, and immunomodulation**

**Supplementary Table S1.** Primer sets used for real-time quantitative reverse transcription polymerase chain reaction (qRT-PCR).

| Gene ID    | Sequence 5'-3'                                          | Concentration (nM) | Efficiency (%) |
|------------|---------------------------------------------------------|--------------------|----------------|
| TERG_02307 | F: CTGATGAGGAGTACTTGCTAC<br>R: CTATCCACTGCTGGTCATCTT    | 300                | 91.2           |
| TERG_11637 | F: CAAGTCAAGAACTGGTGGAAAG<br>R: CTCTGTGCATTTGATGGGTAATC | 100                | 93.5           |
| TERG_07959 | F: CCGACTTTGAGCAGGACTTT<br>R: CTGGGAGAATGAAAGCAGTGT     | 300                | 94.4           |
| TERG_06651 | F: GCTGTCACTCGGTTATACCT<br>R: CATCTCGGATGCGTCTCTAA      | 100                | 92.9           |
| TERG_08114 | F: CTTCTCAACCTTAGCTTCTCC<br>R: ATTCGGGTGGTAGTTCGTATTC   | 300                | 96.4           |
| TERG_00060 | F: CATGGAATTGCTCACGAAAGG<br>R: GATGCTGTGGTTGCTTGTATG    | 100                | 101.7          |
| TERG_00119 | F: GTGCGACTCTTCAGACAGATAA<br>R: TGAACCGTCAAGCAGGATATT   | 100                | 90.6           |
| TERG_01840 | F: ATGATGCTTGCTACCAACC<br>R: TGACTGTTCCGGTAGCAATG       | 300                | 91.2           |
| TERG_01900 | F: GCCACGGTTGATGTCCTATT<br>R: CAAAGAACGGAGCGACCATA      | 100                | 97.8           |
| TERG_01901 | F: GGTTTACCACTGTCCACCTATC<br>R: AACGCAAGTCTTCCCTCATC    | 100                | 94.0           |
| TERG_02368 | F: GCGTGTCTTGCTGGTATCT<br>R: TAGGAGTTTCGCGATTTTGG       | 300                | 99.9           |
| TERG_03544 | F: CTCGCTCTTAGCCAGTTTGT<br>R: GACGGCGTCTGTGAAGTATT      | 100                | 92.0           |
| TERG_04282 | F: CCCTTTGAAATTCGCCATGAG<br>R: TTACTIONACTGGCTGCGGAAAG  | 100                | 90.1           |
| TERG_08261 | F: GCGAGCTTCACTCTTAACTTCT<br>R: GCATTATAGCACGGTATCCTCTC | 300                | 90.5           |
| TERG_01950 | F: CGGGTCTATCTTCTGGTACA<br>R: GGTTAACGGGATCTTCAAGG      | 300                | 95.3           |
| TERG_05627 | F: GGCGTGGAAATCCGTACATTA<br>R: GCATGGGCATAGACGTAGATATAG | 100                | 94.6           |

**Supplementary Table S2.** General features of the RNA sequencing reads mapped on the *Trichophyton rubrum* reference genome.

| Sample                                         | Raw reads  | High-quality reads | Mapped reads STAR | Total mapped reads (%) |
|------------------------------------------------|------------|--------------------|-------------------|------------------------|
| <i>ΔstuA</i> libraries                         |            |                    |                   |                        |
| <i>ΔstuA</i> Glucose 24 hours I                | 9,171,325  | 8,898,166          | 8,493,828         | 95.46                  |
| <i>ΔstuA</i> Glucose 24 hours II               | 10,541,692 | 10,326,195         | 9,899,856         | 95.87                  |
| <i>ΔstuA</i> Glucose 24 hours III              | 12,036,641 | 11,751,222         | 11,267,440        | 95.88                  |
| <i>ΔstuA</i> Glucose 48 hours I                | 10,116,417 | 9,891,678          | 9,664,321         | 97.70                  |
| <i>ΔstuA</i> Glucose 48 hours II               | 10,289,669 | 10,070,030         | 9,720,639         | 96.53                  |
| <i>ΔstuA</i> Glucose 48 hours III              | 13,694,576 | 13,406,285         | 12,889,091        | 96.14                  |
| <i>ΔstuA</i> Glucose 96 hours I                | 8,795,089  | 8,539,811          | 8,265,888         | 96.79                  |
| <i>ΔstuA</i> Glucose 96 hours II               | 11,644,168 | 11,423,553         | 10,308,226        | 90.24                  |
| <i>ΔstuA</i> Glucose 96 hours III <sup>a</sup> | 23,274     | 22,163             | 13,189            | 59.51                  |
| <i>ΔstuA</i> Keratin 24 hours I                | 8,073,262  | 7,889,656          | 7,482,678         | 94.84                  |
| <i>ΔstuA</i> Keratin 24 hours II               | 8,451,660  | 8,266,135          | 7,540,055         | 91.22                  |
| <i>ΔstuA</i> Keratin 24 hours III              | 12,550,744 | 12,274,004         | 11,429,534        | 93.12                  |
| <i>ΔstuA</i> Keratin 48 hours I                | 9,035,221  | 8,826,673          | 8,384,302         | 94.99                  |
| <i>ΔstuA</i> Keratin 48 hours II               | 9,070,728  | 8,879,514          | 8,317,581         | 93.67                  |
| <i>ΔstuA</i> Keratin 48 hours III              | 12,184,619 | 11,891,866         | 10,944,759        | 92.04                  |
| <i>ΔstuA</i> Keratin 96 hours I                | 12,566,366 | 12,309,111         | 11,877,436        | 96.49                  |
| <i>ΔstuA</i> Keratin 96 hours II               | 10,315,165 | 10,083,929         | 9,512,786         | 94.34                  |
| <i>ΔstuA</i> Keratin 96 hours III              | 14,405,588 | 13,990,682         | 12,594,826        | 90.02                  |
| WT libraries                                   |            |                    |                   |                        |
| WT Glucose 24 hours I                          | 10,298,058 | 10,079,869         | 9,513,704         | 94.38                  |
| WT Glucose 24 hours II                         | 11,730,284 | 11,470,387         | 9,274,834         | 80.86                  |
| WT Glucose 24 hours III                        | 13,134,053 | 12,870,769         | 12,130,966        | 94.25                  |
| WT Glucose 48 hours I                          | 12,139,571 | 11,873,826         | 11,045,360        | 93.02                  |
| WT Glucose 48 hours II                         | 8,484,471  | 8,220,328          | 7,582,730         | 92.24                  |
| WT Glucose 48 hours III                        | 13,900,719 | 13,563,244         | 12,759,015        | 94.07                  |
| WT Glucose 96 hours I                          | 10,846,570 | 10,620,463         | 9,913,587         | 93.34                  |
| WT Glucose 96 hours II                         | 9,950,533  | 9,707,227          | 9,214,841         | 94.93                  |
| WT Glucose 96 hours III                        | 12,788,333 | 12,287,043         | 11,533,469        | 93.87                  |
| WT Keratin 24 hours I                          | 9,586,259  | 9,339,491          | 7,040,104         | 75.38                  |
| WT Keratin 24 hours II                         | 10,093,406 | 9,815,286          | 8,266,023         | 84.22                  |
| WT Keratin 24 hours III                        | 13,910,853 | 13,576,336         | 11,848,476        | 87.27                  |
| WT Keratin 48 hours I                          | 11,636,035 | 11,292,471         | 9,374,940         | 83.02                  |
| WT Keratin 48 hours II                         | 9,081,225  | 8,769,772          | 6,548,726         | 74.67                  |
| WT Keratin 48 hours III                        | 10,036,969 | 9,786,133          | 8,751,212         | 89.42                  |
| WT Keratin 96 hours I                          | 8,644,359  | 8,369,738          | 6,533,731         | 78.06                  |
| WT Keratin 96 hours II                         | 8,440,082  | 7,993,994          | 6,216,676         | 77.77                  |
| WT Keratin 96 hours III                        | 12,753,703 | 12,436,022         | 9,652,577         | 77.62                  |

<sup>a</sup> library omitted in the subsequent analyses.

**Supplementary Table S3.** Top 10 genes modulated in  $\Delta stuA$  mutant *Trichophyton rubrum* grown in glucose medium.

| <b>ID</b>                        | <b>Gene Product Name</b>                                                           | <b>log<sub>2</sub>(Fold change)</b> |
|----------------------------------|------------------------------------------------------------------------------------|-------------------------------------|
| <b><u>24 hours (Glucose)</u></b> |                                                                                    |                                     |
| <b>Up-regulated</b>              |                                                                                    |                                     |
| TERG_07028                       | hypothetical protein                                                               | 6.46                                |
| TERG_00598                       | hypothetical protein                                                               | 5.25                                |
| TERG_04115                       | aldo-keto reductase, putative ( <i>T. verrucosum</i> )                             | 4.92                                |
| TERG_01917                       | O-methyltransferase, putative ( <i>A. benhamiae</i> )                              | 4.70                                |
| TERG_00235                       | hypothetical protein                                                               | 4.53                                |
| TERG_07166                       | hypothetical protein                                                               | 4.50                                |
| TERG_01004                       | extracellular sialidase/neuraminidase ( <i>T. equinum</i> )                        | 4.30                                |
| TERG_08358                       | dimethylallyl tryptophan synthase GliD1 ( <i>T. equinum</i> )                      | 4.23                                |
| TERG_06585                       | hypothetical protein                                                               | 4.16                                |
| TERG_02820                       | polyketide synthase ( <i>T. tonsurans</i> )                                        | 4.15                                |
| <b>Down-regulated</b>            |                                                                                    |                                     |
| TERG_04738                       | hypothetical protein                                                               | -8.64                               |
| TERG_06049                       | dimethylallyl tryptophan synthase, putative ( <i>T. verrucosum</i> )               | -8.17                               |
| TERG_02412                       | HHE domain protein ( <i>T. verrucosum</i> )                                        | -7.24                               |
| TERG_02134                       | indoleamine 2,3-dioxygenase ( <i>T. equinum</i> )                                  | -7.13                               |
| TERG_02842                       | 6-hydroxy-D-nicotine oxidase ( <i>T. equinum</i> )                                 | -6.86                               |
| TERG_11863                       | hypothetical protein                                                               | -6.61                               |
| TERG_06267                       | hypothetical protein                                                               | -6.52                               |
| TERG_03161                       | hypothetical protein                                                               | -6.30                               |
| TERG_06051                       | 4-dimethylallyltryptophan methyltransferase ( <i>T. tonsurans</i> )                | -5.77                               |
| TERG_04028                       | cytochrome P450, putative ( <i>T. verrucosum</i> )                                 | -5.62                               |
| <b><u>48 hours (Glucose)</u></b> |                                                                                    |                                     |
| <b>Up-regulated</b>              |                                                                                    |                                     |
| TERG_08358                       | dimethylallyl tryptophan synthase GliD1 ( <i>T. equinum</i> )                      | 8.43                                |
| TERG_07028                       | hypothetical protein                                                               | 7.07                                |
| TERG_02952                       | oxidoreductase, short chain dehydrogenase/reductase family ( <i>A. benhamiae</i> ) | 6.49                                |
| TERG_08229                       | hypothetical protein                                                               | 6.12                                |
| TERG_04115                       | aldo-keto reductase, putative ( <i>T. verrucosum</i> )                             | 5.55                                |
| TERG_11686                       | hypothetical protein                                                               | 5.35                                |
| TERG_08778                       | hypothetical protein                                                               | 5.11                                |
| TERG_00598                       | hypothetical protein                                                               | 4.93                                |
| TERG_00161                       | hypothetical protein                                                               | 4.56                                |
| TERG_06601                       | flavin-containing amine oxidasedehydrogenase ( <i>T. equinum</i> )                 | 4.39                                |
| <b>Down-regulated</b>            |                                                                                    |                                     |
| TERG_06267                       | hypothetical protein                                                               | -8.01                               |
| TERG_03161                       | hypothetical protein                                                               | -7.26                               |
| TERG_04282                       | GPI ethanolamine phosphate transferase ( <i>T. tonsurans</i> )                     | -7.00                               |
| TERG_06049                       | dimethylallyl tryptophan synthase, putative ( <i>T. verrucosum</i> )               | -6.83                               |
| TERG_02134                       | indoleamine 2,3-dioxygenase ( <i>T. equinum</i> )                                  | -6.28                               |

|            |                                                                     |       |
|------------|---------------------------------------------------------------------|-------|
| TERG_06054 | hypothetical protein                                                | -6.14 |
| TERG_08444 | CipC protein ( <i>M. canis</i> )                                    | -6.11 |
| TERG_04028 | cytochrome P450, putative ( <i>T. verrucosum</i> )                  | -6.11 |
| TERG_06051 | 4-dimethylallyltryptophan methyltransferase ( <i>T. tonsurans</i> ) | -6.03 |
| TERG_01279 | flavin-binding monooxygenase ( <i>T. equinum</i> )                  | -5.65 |

**96 hours (Glucose)****Up-regulated**

|            |                                                                    |      |
|------------|--------------------------------------------------------------------|------|
| TERG_07028 | hypothetical protein                                               | 6.69 |
| TERG_04464 | hypothetical protein                                               | 5.98 |
| TERG_04551 | hypothetical protein                                               | 5.13 |
| TERG_12391 | hypothetical protein                                               | 4.94 |
| TERG_03919 | phytoene dehydrogenase ( <i>T. equinum</i> )                       | 4.59 |
| TERG_06035 | hypothetical protein                                               | 4.44 |
| TERG_12090 | hypothetical protein                                               | 3.73 |
| TERG_12042 | RNA helicase/RNase III, putative ( <i>A. benhamiae</i> )           | 3.70 |
| TERG_06601 | flavin-containing amine oxidasedehydrogenase ( <i>T. equinum</i> ) | 3.65 |
| TERG_05965 | hypothetical protein                                               | 3.56 |

**Down-regulated**

|            |                                                                      |       |
|------------|----------------------------------------------------------------------|-------|
| TERG_06267 | hypothetical protein                                                 | -8.73 |
| TERG_05445 | DUF323 domain-containing protein ( <i>T. equinum</i> )               | -7.99 |
| TERG_05733 | salivary glue protein Sgs-3 ( <i>M. canis</i> )                      | -6.75 |
| TERG_07504 | sialidase ( <i>T. tonsurans</i> )                                    | -6.15 |
| TERG_06049 | dimethylallyl tryptophan synthase, putative ( <i>T. verrucosum</i> ) | -5.95 |
| TERG_03161 | hypothetical protein                                                 | -5.86 |
| TERG_02380 | hypothetical protein                                                 | -5.78 |
| TERG_04282 | GPI ethanolamine phosphate transferase ( <i>T. tonsurans</i> )       | -5.57 |
| TERG_05615 | hsp70-like protein ( <i>T. equinum</i> )                             | -5.55 |
| TERG_02134 | indoleamine 2,3-dioxygenase ( <i>T. equinum</i> )                    | -5.49 |

---

**Supplementary Table S4.** Top 10 genes modulated in  $\Delta stuA$  mutant *Trichophyton rubrum* grown on keratin.

| <b>ID</b>                        | <b>Gene Product Name</b>                                                            | <b>log<sub>2</sub>(Fold change)</b> |
|----------------------------------|-------------------------------------------------------------------------------------|-------------------------------------|
| <b><u>24 hours (Keratin)</u></b> |                                                                                     |                                     |
| <b>Up-regulated</b>              |                                                                                     |                                     |
| TERG_06585                       | hypothetical protein                                                                | 8.28                                |
| TERG_07028                       | hypothetical protein                                                                | 7.30                                |
| TERG_01913                       | cytochrome P450 monooxygenase, putative ( <i>A. benhamiae</i> )                     | 6.14                                |
| TERG_05733                       | salivary glue protein Sgs-3 ( <i>M. canis</i> )                                     | 6.08                                |
| TERG_01915                       | O-methyltransferase ( <i>A. benhamiae</i> )                                         | 6.06                                |
| TERG_12594                       | oxidoreductase, short-chain dehydrogenase/reductase family ( <i>T. verrucosum</i> ) | 5.01                                |
| TERG_12089                       | cytochrome P450, putative ( <i>T. verrucosum</i> )                                  | 4.72                                |
| TERG_01917                       | O-methyltransferase, putative ( <i>A. benhamiae</i> )                               | 4.57                                |
| TERG_05442                       | hypothetical protein                                                                | 4.56                                |
| TERG_11528                       | tenascin C ( <i>T. equinum</i> )                                                    | 4.55                                |
| <b>Down-regulated</b>            |                                                                                     |                                     |
| TERG_06802                       | hypothetical protein                                                                | -5.48                               |
| TERG_04738                       | hypothetical protein                                                                | -5.34                               |
| TERG_06414                       | DUF1338 domain-containing protein ( <i>T. equinum</i> )                             | -5.02                               |
| TERG_06651                       | cytochrome P450, putative ( <i>T. verrucosum</i> )                                  | -4.59                               |
| TERG_01599                       | hypothetical protein                                                                | -4.42                               |
| TERG_00714                       | cell pattern formation-associated protein ( <i>T. tonsurans</i> )                   | -4.19                               |
| TERG_02365                       | hypothetical protein                                                                | -4.13                               |
| TERG_06160                       | nitrite reductase, copper-containing                                                | -4.10                               |
| TERG_08806                       | hypothetical protein                                                                | -4.08                               |
| TERG_06854                       | glutamine-serine-proline rich protein, putative ( <i>A. benhamiae</i> )             | -4.05                               |
| <b><u>48 hours (Keratin)</u></b> |                                                                                     |                                     |
| <b>Up-regulated</b>              |                                                                                     |                                     |
| TERG_07357                       | hypothetical protein                                                                | 7.63                                |
| TERG_06585                       | hypothetical protein                                                                | 6.71                                |
| TERG_03345                       | hypothetical protein                                                                | 6.11                                |
| TERG_04047                       | cysteine-rich secreted protein ( <i>A. benhamiae</i> )                              | 5.70                                |
| TERG_12594                       | oxidoreductase, short-chain dehydrogenase/reductase family ( <i>T. verrucosum</i> ) | 5.33                                |
| TERG_03198                       | hypothetical protein                                                                | 5.07                                |
| TERG_01913                       | cytochrome P450 monooxygenase, putative ( <i>A. benhamiae</i> )                     | 4.99                                |
| TERG_05141                       | NCS1 nucleoside transporter ( <i>T. equinum</i> )                                   | 4.96                                |
| TERG_11907                       | FAD binding domain containing protein ( <i>T. equinum</i> )                         | 4.95                                |
| TERG_01915                       | O-methyltransferase ( <i>A. benhamiae</i> )                                         | 4.95                                |
| <b>Down-regulated</b>            |                                                                                     |                                     |
| TERG_06414                       | DUF1338 domain-containing protein ( <i>T. equinum</i> )                             | -7.31                               |
| TERG_00235                       | hypothetical protein                                                                | -6.67                               |
| TERG_05943                       | aminotransferase, class III ( <i>T. verrucosum</i> )                                | -5.81                               |
| TERG_08444                       | CipC protein ( <i>M. canis</i> )                                                    | -5.59                               |
| TERG_00060                       | GPI anchored cell wall protein, putative ( <i>A. benhamiae</i> )                    | -5.16                               |

|            |                                                                         |       |
|------------|-------------------------------------------------------------------------|-------|
| TERG_08182 | hypothetical protein                                                    | -5.14 |
| TERG_00026 | flavin-binding monooxygenase, putative ( <i>T. verrucosum</i> )         | -5.05 |
| TERG_04738 | hypothetical protein                                                    | -5.00 |
| TERG_03732 | hypothetical protein                                                    | -4.89 |
| TERG_06854 | glutamine-serine-proline rich protein, putative ( <i>A. benhamiae</i> ) | -4.88 |

**96 hours (Keratin)****Up-regulated**

|            |                                                                 |      |
|------------|-----------------------------------------------------------------|------|
| TERG_01659 | heat shock protein Hsp30-like, putative ( <i>A. benhamiae</i> ) | 5.83 |
| TERG_12507 | hsp98-like protein ( <i>T. equinum</i> )                        | 5.14 |
| TERG_00499 | hypothetical protein                                            | 5.11 |
| TERG_06585 | hypothetical protein                                            | 4.87 |
| TERG_07949 | heat shock protein 78 ( <i>T. tonsurans</i> )                   | 4.69 |
| TERG_07357 | hypothetical protein                                            | 4.69 |
| TERG_01731 | hypothetical protein                                            | 4.27 |
| TERG_03390 | glutathione S-transferase ( <i>T. equinum</i> )                 | 4.25 |
| TERG_07099 | hypothetical protein                                            | 4.17 |
| TERG_05141 | NCS1 nucleoside transporter ( <i>T. equinum</i> )               | 4.16 |

**Down-regulated**

|            |                                                         |       |
|------------|---------------------------------------------------------|-------|
| TERG_00235 | hypothetical protein                                    | -8.18 |
| TERG_06414 | DUF1338 domain-containing protein ( <i>T. equinum</i> ) | -7.38 |
| TERG_05943 | aminotransferase, class III ( <i>T. verrucosum</i> )    | -6.54 |
| TERG_07504 | sialidase ( <i>T. tonsurans</i> )                       | -5.70 |
| TERG_04879 | hypothetical protein                                    | -5.68 |
| TERG_03311 | hypothetical protein                                    | -5.63 |
| TERG_07326 | glutathione S-transferase PARB ( <i>T. equinum</i> )    | -5.62 |
| TERG_08444 | CipC protein ( <i>M. canis</i> )                        | -5.20 |
| TERG_05611 | hypothetical protein                                    | -5.20 |
| TERG_03732 | hypothetical protein                                    | -5.09 |

---

**Supplementary Table S5.** Differentially expressed genes in  $\Delta stuA$  vs. wild-type *Trichophyton rubrum* grown in glucose medium or keratin.

**$\Delta stuA$  vs. wild type (Glucose)**

| <b>ID</b>  | <b>24 hours</b> | <b>48 hours</b> | <b>96 hours</b> | <b>Gene Product Name</b>                                            |
|------------|-----------------|-----------------|-----------------|---------------------------------------------------------------------|
| TERG_01917 | 4.70            |                 |                 | O-methyltransferase, putative ( <i>A. benhamiae</i> )               |
| TERG_00235 | 4.53            |                 |                 | hypothetical protein                                                |
| TERG_06585 | 4.16            |                 |                 | hypothetical protein                                                |
| TERG_07357 | 3.78            |                 |                 | hypothetical protein                                                |
| TERG_01915 | 3.35            |                 |                 | O-methyltransferase ( <i>A. benhamiae</i> )                         |
| TERG_01914 | 3.20            |                 |                 | trichodiene oxygenase ( <i>T. equinum</i> )                         |
| TERG_01668 | 3.20            |                 |                 | DUF396 doamin protein ( <i>T. equinum</i> )                         |
| TERG_00127 | 2.93            |                 |                 | secretory phospholipase A2 ( <i>T. tonsurans</i> )                  |
| TERG_11907 | 2.93            |                 |                 | FAD binding domain containing protein ( <i>T. equinum</i> )         |
| TERG_11906 | 2.91            |                 |                 | FAD binding domain containing protein ( <i>T. equinum</i> )         |
| TERG_01913 | 2.79            |                 |                 | cytochrome P450 monooxygenase, putative ( <i>A. benhamiae</i> )     |
| TERG_04066 | 2.73            |                 |                 | filamentation protein (Rhf1), putative ( <i>T. verrucosum</i> )     |
| TERG_08029 | 2.38            |                 |                 | HMG box protein, putative ( <i>T. verrucosum</i> )                  |
| TERG_11805 | 2.37            |                 |                 | hypothetical protein                                                |
| TERG_08289 | 2.33            |                 |                 | Rpp14 family protein ( <i>T. equinum</i> )                          |
| TERG_08180 | 2.32            |                 |                 | oxalate decarboxylase ( <i>T. equinum</i> )                         |
| TERG_01994 | 2.23            |                 |                 | OPT family oligopeptide transporter                                 |
| TERG_05968 | 2.17            |                 |                 | hypothetical protein                                                |
| TERG_05124 | 2.13            |                 |                 | gliotoxin biosynthesis protein GliK ( <i>T. verrucosum</i> )        |
| TERG_03947 | 2.12            |                 |                 | hypothetical protein                                                |
| TERG_05453 | 2.08            |                 |                 | amino acid permease ( <i>T. equinum</i> )                           |
| TERG_12217 | 2.08            |                 |                 | hypothetical protein                                                |
| TERG_07220 | 2.06            |                 |                 | hypothetical protein                                                |
| TERG_04329 | 2.03            |                 |                 | chitosanase, putative ( <i>T. verrucosum</i> )                      |
| TERG_00736 | 2.02            |                 |                 | alpha/beta hydrolase, putative ( <i>A. benhamiae</i> )              |
| TERG_06547 | 2.02            |                 |                 | glycerophosphoryl diester phosphodiesterase ( <i>T. tonsurans</i> ) |
| TERG_12337 | 2.01            |                 |                 | hypothetical protein                                                |
| TERG_12679 | 2.00            |                 |                 | JmjC domain-containing protein ( <i>T. tonsurans</i> )              |
| TERG_05524 | 1.95            |                 |                 | 3-deoxy-7-phosphoheptulonate synthase                               |
| TERG_06761 | 1.95            |                 |                 | CAMK protein kinase ( <i>T. tonsurans</i> )                         |
| TERG_08346 | 1.95            |                 |                 | hypothetical protein                                                |
| TERG_02513 | 1.94            |                 |                 | TAM domain methyltransferase ( <i>T. equinum</i> )                  |
| TERG_12142 | 1.92            |                 |                 | hypothetical protein                                                |
| TERG_06548 | 1.91            |                 |                 | hypothetical protein                                                |
| TERG_04863 | 1.90            |                 |                 | hypothetical protein                                                |
| TERG_08666 | 1.89            |                 |                 | hypothetical protein                                                |
| TERG_05850 | 1.87            |                 |                 | integral membrane protein ( <i>A. benhamiae</i> )                   |
| TERG_01713 | 1.86            |                 |                 | C6 finger domain protein, putative ( <i>T. verrucosum</i> )         |
| TERG_12112 | 1.86            |                 |                 | hypothetical protein                                                |

## Supplementary Material

|            |       |                                                                                    |
|------------|-------|------------------------------------------------------------------------------------|
| TERG_07998 | 1.85  | hypothetical protein                                                               |
| TERG_02099 | 1.84  | uracil permease ( <i>T. equinum</i> )                                              |
| TERG_08378 | 1.82  | hypothetical protein                                                               |
| TERG_04615 | 1.78  | hypothetical protein                                                               |
| TERG_05443 | 1.78  | hypothetical protein                                                               |
| TERG_08400 | 1.78  | hypothetical protein                                                               |
| TERG_11529 | 1.77  | hypothetical protein                                                               |
| TERG_07564 | 1.77  | RNA polymerase II mediator complex subunit Srb5, putative ( <i>T. verrucosum</i> ) |
| TERG_01638 | 1.77  | hypothetical protein                                                               |
| TERG_11903 | 1.77  | hypothetical protein                                                               |
| TERG_06502 | 1.76  | histone chaperone RTT106 ( <i>T. tonsurans</i> )                                   |
| TERG_11710 | 1.74  | hypothetical protein                                                               |
| TERG_03179 | 1.73  | NlpC/P60-like cell-wall peptidase, putative ( <i>A. benhamiae</i> )                |
| TERG_11806 | 1.73  | hypothetical protein                                                               |
| TERG_01947 | 1.70  | hypothetical protein                                                               |
| TERG_06211 | 1.68  | DUF498 domain-containing protein ( <i>T. equinum</i> )                             |
| TERG_00307 | 1.67  | hypothetical protein                                                               |
| TERG_06968 | 1.66  | MIND kinetochore complex component Nnf1 ( <i>T. equinum</i> )                      |
| TERG_11527 | 1.66  | tenascin C ( <i>T. equinum</i> )                                                   |
| TERG_12214 | 1.61  | hypothetical protein                                                               |
| TERG_00027 | 1.60  | F-box domain protein ( <i>A. benhamiae</i> )                                       |
| TERG_01740 | 1.60  | alpha,alpha-trehalose phosphate synthase subunit, putative ( <i>A. benhamiae</i> ) |
| TERG_11592 | 1.59  | palmitoyl-protein thioesterase ( <i>T. tonsurans</i> )                             |
| TERG_08351 | 1.59  | hypothetical protein                                                               |
| TERG_06745 | 1.58  | hypothetical protein                                                               |
| TERG_04855 | 1.57  | hypothetical protein                                                               |
| TERG_08377 | 1.56  | copper transporter Ctr ( <i>T. tonsurans</i> )                                     |
| TERG_08662 | 1.55  | hypothetical protein                                                               |
| TERG_02974 | 1.55  | hypothetical protein                                                               |
| TERG_02378 | 1.54  | hypothetical protein                                                               |
| TERG_01760 | 1.53  | protein-ER retention protein ( <i>T. tonsurans</i> )                               |
| TERG_01594 | 1.52  | hypothetical protein                                                               |
| TERG_02423 | 1.52  | hypothetical protein                                                               |
| TERG_04763 | -1.51 | fructosyl amine:oxygen oxidoreductase ( <i>T. tonsurans</i> )                      |
| TERG_03340 | -1.52 | oxidoreductase ( <i>T. equinum</i> )                                               |
| TERG_01494 | -1.53 | hypothetical protein                                                               |
| TERG_11594 | -1.53 | serine carboxypeptidase ( <i>T. tonsurans</i> )                                    |
| TERG_06147 | -1.54 | pyridine nucleotide-disulfide oxidoreductase, putative ( <i>A. benhamiae</i> )     |
| TERG_07211 | -1.55 | NAD binding Rossmann fold oxidoreductase, putative ( <i>A. benhamiae</i> )         |
| TERG_05418 | -1.57 | hypothetical protein                                                               |
| TERG_11728 | -1.57 | C6 transcription factor, putative ( <i>T. verrucosum</i> )                         |



|            |       |                                                                                           |
|------------|-------|-------------------------------------------------------------------------------------------|
| TERG_05044 | -1.57 | epoxide hydrolase, putative ( <i>A. benhamiae</i> )                                       |
| TERG_06888 | -1.57 | transulfuration enzyme family protein, putative ( <i>A. benhamiae</i> )                   |
| TERG_05342 | -1.58 | MFS multidrug transporter, putative ( <i>A. benhamiae</i> )                               |
| TERG_01215 | -1.58 | chromosome segregation protein ( <i>T. tonsurans</i> )                                    |
| TERG_07083 | -1.59 | hypothetical protein                                                                      |
| TERG_05585 | -1.59 | short-chain dehydrogenase/reductase SDR ( <i>T. equinum</i> )                             |
| TERG_04082 | -1.59 | DUF89 domain-containing protein ( <i>T. equinum</i> )                                     |
| TERG_01197 | -1.59 | nitrilase ( <i>T. tonsurans</i> )                                                         |
| TERG_12576 | -1.59 | jumonji family transcription factor ( <i>T. equinum</i> )                                 |
| TERG_00976 | -1.61 | serine hydroxymethyltransferase, cytosolic                                                |
| TERG_03672 | -1.62 | hypothetical protein                                                                      |
| TERG_02953 | -1.62 | hypothetical protein                                                                      |
| TERG_01338 | -1.62 | hydantoinase ( <i>T. equinum</i> )                                                        |
| TERG_07235 | -1.64 | fructose-1,6-bisphosphatase ( <i>T. tonsurans</i> )                                       |
| TERG_12721 | -1.64 | transferase ( <i>M. canis</i> )                                                           |
| TERG_03758 | -1.65 | hypothetical protein                                                                      |
| TERG_06390 | -1.68 | sulfite reductase flavoprotein alpha-component ( <i>T. equinum</i> )                      |
| TERG_00067 | -1.69 | hypothetical protein                                                                      |
| TERG_08617 | -1.71 | hypothetical protein                                                                      |
| TERG_06810 | -1.71 | hypothetical protein                                                                      |
| TERG_06233 | -1.72 | hypothetical protein                                                                      |
| TERG_01955 | -1.73 | YjeF C ( <i>T. tonsurans</i> )                                                            |
| TERG_00820 | -1.77 | MFS multidrug transporter, putative ( <i>A. benhamiae</i> )                               |
| TERG_00974 | -1.77 | 2,3-bisphosphoglycerate-independent phosphoglycerate mutase                               |
| TERG_03671 | -1.78 | hypothetical protein                                                                      |
| TERG_07673 | -1.79 | hypothetical protein                                                                      |
| TERG_03698 | -1.79 | hypothetical protein                                                                      |
| TERG_12281 | -1.80 | glycosyl hydrolase ( <i>T. tonsurans</i> )                                                |
| TERG_08058 | -1.80 | alpha-1,2-mannosidase family protein ( <i>T. verrucosum</i> )                             |
| TERG_06234 | -1.82 | 2,5-diketo-D-gluconic acid reductase A ( <i>T. equinum</i> )                              |
| TERG_05876 | -1.87 | hypothetical protein                                                                      |
| TERG_03780 | -1.88 | pyruvate dehydrogenase dihydrolipoamide acetyltransferase component ( <i>M. gypseum</i> ) |
| TERG_08443 | -1.94 | adenosylhomocysteinase                                                                    |
| TERG_02474 | -1.95 | hypothetical protein                                                                      |
| TERG_06376 | -1.96 | hypothetical protein                                                                      |
| TERG_00324 | -2.00 | stress response protein ish1 ( <i>M. canis</i> )                                          |
| TERG_11963 | -2.02 | hypothetical protein                                                                      |
| TERG_08299 | -2.04 | multidrug resistance-associated protein 1 transporter ( <i>M. canis</i> )                 |
| TERG_00942 | -2.09 | hypothetical protein                                                                      |
| TERG_11637 | -2.14 | isocitrate lyase                                                                          |
| TERG_07035 | -2.16 | hypothetical protein                                                                      |
| TERG_04521 | -2.18 | HypA-like protein, putative ( <i>A. benhamiae</i> )                                       |
| TERG_01844 | -2.23 | hypothetical protein                                                                      |
| TERG_02009 | -2.25 | short chain oxidoreductase (CsgA), putative ( <i>T. verrucosum</i> )                      |

## Supplementary Material

|            |       |                                                                                      |
|------------|-------|--------------------------------------------------------------------------------------|
| TERG_05843 | -2.30 | F-box domain-containing protein ( <i>T. equinum</i> )                                |
| TERG_02555 | -2.32 | DUF636 domain containing protein ( <i>T. equinum</i> )                               |
| TERG_02671 | -2.33 | hypothetical protein                                                                 |
| TERG_06235 | -2.41 | hypothetical protein                                                                 |
| TERG_12096 | -2.48 | OmtA protein ( <i>M. canis</i> )                                                     |
| TERG_07280 | -2.49 | hypothetical protein                                                                 |
| TERG_04427 | -2.51 | serine/threonine protein kinase                                                      |
| TERG_01641 | -2.55 | FK506 suppressor Sfk1 ( <i>T. equinum</i> )                                          |
| TERG_08965 | -2.58 | ubiquitin-conjugating enzyme E2S ( <i>T. equinum</i> )                               |
| TERG_05816 | -2.60 | hypothetical protein                                                                 |
| TERG_03105 | -2.61 | hypothetical protein                                                                 |
| TERG_00370 | -2.63 | glutathione S-transferase ( <i>T. tonsurans</i> )                                    |
| TERG_00414 | -2.66 | 3-beta hydroxysteroid dehydrogenase/isomerase family protein ( <i>A. benhamiae</i> ) |
| TERG_04714 | -2.70 | mitochondrial phosphate carrier protein ( <i>T. tonsurans</i> )                      |
| TERG_00500 | -2.75 | hypothetical protein                                                                 |
| TERG_11650 | -3.02 | hypothetical protein                                                                 |
| TERG_01499 | -3.50 | NmrA family protein ( <i>T. equinum</i> )                                            |
| TERG_08344 | -3.83 | hypothetical protein                                                                 |
| TERG_02841 | -4.22 | AURR1 aurofusarin regulatory protein ( <i>T. equinum</i> )                           |
| TERG_05428 | -5.19 | hypothetical protein                                                                 |
| TERG_11863 | -6.61 | hypothetical protein                                                                 |

Gene expression values are expressed in log<sub>2</sub> fold change.

| ID         | 24 hours | 48 hours | 96 hours | Gene Product Name                                                                  |
|------------|----------|----------|----------|------------------------------------------------------------------------------------|
| TERG_02952 |          | 6.49     |          | oxidoreductase, short chain dehydrogenase/reductase family ( <i>A. benhamiae</i> ) |
| TERG_08229 |          | 6.12     |          | hypothetical protein                                                               |
| TERG_11686 |          | 5.35     |          | hypothetical protein                                                               |
| TERG_08778 |          | 5.11     |          | hypothetical protein                                                               |
| TERG_07011 |          | 4.34     |          | conserved fungal protein ( <i>A. benhamiae</i> )                                   |
| TERG_05141 |          | 4.31     |          | NCS1 nucleoside transporter ( <i>T. equinum</i> )                                  |
| TERG_12195 |          | 3.49     |          | developmental regulator flbA ( <i>M. gypseum</i> )                                 |
| TERG_06785 |          | 3.42     |          | cytochrome P450 monooxygenase ( <i>T. equinum</i> )                                |
| TERG_04118 |          | 3.42     |          | hypothetical protein                                                               |
| TERG_08262 |          | 3.41     |          | C6 transcription factor, putative ( <i>A. benhamiae</i> )                          |
| TERG_08643 |          | 3.40     |          | hypothetical protein                                                               |
| TERG_12068 |          | 3.38     |          | PLC-E ( <i>T. equinum</i> )                                                        |
| TERG_08247 |          | 3.33     |          | hypothetical protein                                                               |
| TERG_02955 |          | 3.22     |          | CP2 transcription factor, putative ( <i>A. benhamiae</i> )                         |
| TERG_12284 |          | 3.21     |          | alkaline serine protease ( <i>T. equinum</i> )                                     |
| TERG_01802 |          | 3.20     |          | hypothetical protein                                                               |
| TERG_11764 |          | 3.12     |          | proline-threonine-rich repeat protein ( <i>T. tonsurans</i> )                      |

|            |      |                                                                                        |
|------------|------|----------------------------------------------------------------------------------------|
| TERG_08227 | 3.09 | aldo-keto reductase (YakC), putative ( <i>A. benhamiae</i> )                           |
| TERG_04068 | 2.96 | cytochrome P450 monooxygenase, putative ( <i>A. benhamiae</i> )                        |
| TERG_12599 | 2.94 | hypothetical protein                                                                   |
| TERG_03955 | 2.90 | RNA 3'-terminal phosphate cyclase, putative ( <i>T. verrucosum</i> )                   |
| TERG_08116 | 2.89 | hypothetical protein                                                                   |
| TERG_03707 | 2.87 | geranylgeranyl diphosphate synthase, putative ( <i>A. benhamiae</i> )                  |
| TERG_01148 | 2.85 | hypothetical protein                                                                   |
| TERG_01735 | 2.77 | SAP domain-containing protein ( <i>T. equinum</i> )                                    |
| TERG_06065 | 2.76 | conserved glycine-rich protein ( <i>T. verrucosum</i> )                                |
| TERG_03172 | 2.69 | sodium/phosphate symporter ( <i>T. tonsurans</i> )                                     |
| TERG_01366 | 2.65 | hypothetical protein                                                                   |
| TERG_05363 | 2.62 | hypothetical protein                                                                   |
| TERG_00213 | 2.60 | hypothetical protein                                                                   |
| TERG_06022 | 2.58 | hypothetical protein                                                                   |
| TERG_01821 | 2.57 | cysteine synthase ( <i>T. tonsurans</i> )                                              |
| TERG_05497 | 2.57 | C6 zinc finger domain-containing protein ( <i>T. equinum</i> )                         |
| TERG_08230 | 2.55 | hypothetical protein                                                                   |
| TERG_12370 | 2.55 | MFS multidrug transporter, putative ( <i>A. benhamiae</i> )                            |
| TERG_02445 | 2.46 | hypothetical protein                                                                   |
| TERG_00754 | 2.43 | hypothetical protein                                                                   |
| TERG_12438 | 2.41 | gamma-glutamyltranspeptidase ( <i>T. tonsurans</i> )                                   |
| TERG_03208 | 2.41 | hypothetical protein                                                                   |
| TERG_01357 | 2.39 | hypothetical protein                                                                   |
| TERG_03130 | 2.38 | C2H2 transcription factor (Rpn4), putative ( <i>T. verrucosum</i> )                    |
| TERG_01382 | 2.38 | hypothetical protein                                                                   |
| TERG_11776 | 2.37 | hypothetical protein                                                                   |
| TERG_00528 | 2.34 | hypothetical protein                                                                   |
| TERG_04951 | 2.34 | U-box domain-containing protein ( <i>T. equinum</i> )                                  |
| TERG_12369 | 2.33 | MFS multidrug transporter ( <i>T. tonsurans</i> )                                      |
| TERG_12114 | 2.32 | hypothetical protein                                                                   |
| TERG_12521 | 2.31 | hypothetical protein                                                                   |
| TERG_08602 | 2.29 | alpha-ketoglutarate-dependent taurine dioxygenase ( <i>T. verrucosum</i> )             |
| TERG_00513 | 2.29 | hypothetical protein                                                                   |
| TERG_12600 | 2.27 | U3 small nucleolar ribonucleoprotein IMP4 ( <i>T. tonsurans</i> )                      |
| TERG_11874 | 2.27 | hypothetical protein                                                                   |
| TERG_03732 | 2.27 | hypothetical protein                                                                   |
| TERG_07239 | 2.25 | zinc-binding oxidoreductase, putative ( <i>A. benhamiae</i> )                          |
| TERG_03113 | 2.24 | Zn-dependent hydrolase/oxidoreductase family protein, putative ( <i>A. benhamiae</i> ) |
| TERG_12296 | 2.24 | hypothetical protein                                                                   |
| TERG_02572 | 2.23 | hypothetical protein                                                                   |
| TERG_04200 | 2.22 | hypothetical protein                                                                   |
| TERG_11775 | 2.19 | hypothetical protein                                                                   |
| TERG_03849 | 2.19 | HET domain protein ( <i>T. tonsurans</i> )                                             |

|            |      |                                                                                    |
|------------|------|------------------------------------------------------------------------------------|
| TERG_00912 | 2.19 | hypothetical protein                                                               |
| TERG_04766 | 2.18 | calcium/proton exchanger                                                           |
| TERG_12663 | 2.18 | hypothetical protein                                                               |
| TERG_11565 | 2.15 | hypothetical protein                                                               |
| TERG_01820 | 2.14 | MFS transporter, putative ( <i>T. verrucosum</i> )                                 |
| TERG_12637 | 2.12 | hypothetical protein                                                               |
| TERG_04481 | 2.09 | RTA1 domain protein, putative ( <i>A. benhamiae</i> )                              |
| TERG_05198 | 2.09 | hypothetical protein                                                               |
| TERG_00535 | 2.09 | calcium-translocating P-type ATPase, PMCA-type                                     |
| TERG_11975 | 2.07 | integral membrane protein ( <i>T. verrucosum</i> )                                 |
| TERG_06515 | 2.07 | tetracycline transporter ( <i>T. equinum</i> )                                     |
| TERG_11817 | 2.04 | transcription initiation factor TFIID subunit 7, putative ( <i>T. verrucosum</i> ) |
| TERG_01623 | 2.03 | MFS transporter ( <i>T. equinum</i> )                                              |
| TERG_07636 | 2.03 | dual specificity phosphatase ( <i>T. tonsurans</i> )                               |
| TERG_03415 | 2.01 | serine/threonine protein kinase                                                    |
| TERG_05199 | 2.01 | MFS gliotoxin efflux transporter GliA ( <i>T. verrucosum</i> )                     |
| TERG_12140 | 2.00 | lipase ( <i>T. equinum</i> )                                                       |
| TERG_08044 | 2.00 | GPI anchored protein, putative ( <i>A. benhamiae</i> )                             |
| TERG_11695 | 1.99 | hypothetical protein                                                               |
| TERG_08821 | 1.99 | ribosome biogenesis ( <i>T. equinum</i> )                                          |
| TERG_06047 | 1.99 | hypothetical protein                                                               |
| TERG_08815 | 1.97 | hypothetical protein                                                               |
| TERG_03228 | 1.95 | transcriptional regulator PacG/VIB-1 ( <i>T. verrucosum</i> )                      |
| TERG_05993 | 1.95 | DUF124 domain-containing protein ( <i>T. equinum</i> )                             |
| TERG_03240 | 1.95 | transmembrane efflux protein ( <i>T. tonsurans</i> )                               |
| TERG_02510 | 1.95 | hypothetical protein                                                               |
| TERG_03297 | 1.94 | hypothetical protein                                                               |
| TERG_02425 | 1.92 | RNA binding protein ( <i>A. benhamiae</i> )                                        |
| TERG_01645 | 1.90 | mitochondrial carrier protein ( <i>T. tonsurans</i> )                              |
| TERG_02972 | 1.89 | SRF-type transcription factor rlmA ( <i>T. equinum</i> )                           |
| TERG_02562 | 1.89 | chitin synthase C                                                                  |
| TERG_00611 | 1.87 | para-aminobenzoate synthase PabaA ( <i>T. verrucosum</i> )                         |
| TERG_02081 | 1.87 | RNA binding protein                                                                |
| TERG_02124 | 1.87 | rho-GTPase-activating protein ( <i>T. tonsurans</i> )                              |
| TERG_08982 | 1.86 | hypothetical protein                                                               |
| TERG_04473 | 1.86 | hypothetical protein                                                               |
| TERG_08619 | 1.86 | siderophore iron transporter mirB ( <i>T. equinum</i> )                            |
| TERG_00196 | 1.86 | hypothetical protein                                                               |
| TERG_03892 | 1.85 | CAMK/CAMKL protein kinase ( <i>T. tonsurans</i> )                                  |
| TERG_11824 | 1.85 | hypothetical protein                                                               |
| TERG_07408 | 1.85 | acetyltransferase, GNAT family ( <i>A. benhamiae</i> )                             |
| TERG_07143 | 1.85 | potassium/sodium efflux P-type ATPase, fungal-type                                 |
| TERG_07551 | 1.84 | hypothetical protein                                                               |

|            |      |                                                                                  |
|------------|------|----------------------------------------------------------------------------------|
| TERG_04472 | 1.83 | hypothetical protein                                                             |
| TERG_01173 | 1.82 | hypothetical protein                                                             |
| TERG_03343 | 1.82 | fatty acid desaturase ( <i>T. equinum</i> )                                      |
| TERG_02591 | 1.82 | D-tyrosyl-tRNA(Tyr) deacylase                                                    |
| TERG_05698 | 1.82 | transesterase (LovD), putative ( <i>T. verrucosum</i> )                          |
| TERG_08357 | 1.82 | polyketide synthase, putative ( <i>A. benhamiae</i> )                            |
| TERG_03793 | 1.82 | elongation factor 3 ( <i>M. gypseum</i> )                                        |
| TERG_06792 | 1.82 | hypothetical protein                                                             |
| TERG_02993 | 1.81 | allergenic cerato-platanin Asp F13 ( <i>T. verrucosum</i> )                      |
| TERG_02973 | 1.81 | morphogenesis protein (Msb1), putative ( <i>T. verrucosum</i> )                  |
| TERG_11549 | 1.81 | hypothetical protein                                                             |
| TERG_07072 | 1.81 | ATP-dependent RNA helicase DRS1                                                  |
| TERG_08225 | 1.81 | hypothetical protein                                                             |
| TERG_07817 | 1.80 | endoglucanase ( <i>T. equinum</i> )                                              |
| TERG_12350 | 1.80 | hypothetical protein                                                             |
| TERG_05429 | 1.80 | MFS multidrug transporter, putative ( <i>T. verrucosum</i> )                     |
| TERG_12373 | 1.79 | multidrug resistance protein ( <i>T. tonsurans</i> )                             |
| TERG_02041 | 1.79 | glutathione S-transferase ( <i>T. equinum</i> )                                  |
| TERG_01150 | 1.79 | hypothetical protein                                                             |
| TERG_02570 | 1.77 | potentail helicase MOV-10 ( <i>T. equinum</i> )                                  |
| TERG_06929 | 1.77 | chitinase ( <i>T. equinum</i> )                                                  |
| TERG_06328 | 1.77 | AdoMet-dependent rRNA methyltransferase spb1                                     |
| TERG_11976 | 1.76 | integral membrane protein ( <i>T. tonsurans</i> )                                |
| TERG_06118 | 1.76 | hypothetical protein                                                             |
| TERG_01568 | 1.75 | ATP-dependent RNA helicase DED1                                                  |
| TERG_08717 | 1.75 | tRNA methyltransferase ( <i>T. tonsurans</i> )                                   |
| TERG_05752 | 1.74 | serine/threonine-protein phosphatase PP1                                         |
| TERG_01636 | 1.74 | ADP-ribosylglycohydrolase ( <i>M. gypseum</i> )                                  |
| TERG_12694 | 1.74 | hypothetical protein                                                             |
| TERG_05988 | 1.74 | solid-state culture expressed protein (Aos23), putative ( <i>T. verrucosum</i> ) |
| TERG_02797 | 1.73 | WD repeat protein ( <i>T. tonsurans</i> )                                        |
| TERG_12351 | 1.73 | hypothetical protein                                                             |
| TERG_12573 | 1.73 | CHD5 domain-containing protein ( <i>T. equinum</i> )                             |
| TERG_04184 | 1.73 | CorA family metal ion transporter, putative ( <i>A. benhamiae</i> )              |
| TERG_08200 | 1.73 | hypothetical protein                                                             |
| TERG_00514 | 1.72 | hypothetical protein                                                             |
| TERG_00273 | 1.72 | mucin ( <i>M. canis</i> )                                                        |
| TERG_12125 | 1.72 | hypothetical protein                                                             |
| TERG_01863 | 1.72 | hypothetical protein                                                             |
| TERG_03692 | 1.72 | solid-state culture specific protein, putative ( <i>A. benhamiae</i> )           |
| TERG_01659 | 1.71 | heat shock protein Hsp30-like, putative ( <i>A. benhamiae</i> )                  |
| TERG_02123 | 1.70 | adenylate-forming enzyme, putative ( <i>A. benhamiae</i> )                       |
| TERG_03278 | 1.69 | hypothetical protein                                                             |
| TERG_05551 | 1.68 | hypothetical protein                                                             |

## Supplementary Material

|            |      |                                                                          |
|------------|------|--------------------------------------------------------------------------|
| TERG_03556 | 1.68 | transcriptional regulator Medusa ( <i>A. benhamiae</i> )                 |
| TERG_03512 | 1.68 | hypothetical protein                                                     |
| TERG_04153 | 1.68 | 60S ribosome biogenesis protein Brx1 ( <i>T. tonsurans</i> )             |
| TERG_07317 | 1.68 | phosphatidylinositol phospholipase C ( <i>T. tonsurans</i> )             |
| TERG_12198 | 1.66 | hypothetical protein                                                     |
| TERG_04509 | 1.66 | hypothetical protein                                                     |
| TERG_06163 | 1.66 | MYB family conidiophore development protein FlbD ( <i>T. equinum</i> )   |
| TERG_01734 | 1.65 | hypothetical protein                                                     |
| TERG_06827 | 1.64 | hypothetical protein                                                     |
| TERG_01175 | 1.64 | LovB-like polyketide synthase, putative ( <i>A. benhamiae</i> )          |
| TERG_07570 | 1.64 | G-protein signaling regulator, putative ( <i>T. verrucosum</i> )         |
| TERG_12502 | 1.63 | C6 finger domain-containing protein ( <i>T. equinum</i> )                |
| TERG_05226 | 1.62 | nuclear localization protein, putative ( <i>T. verrucosum</i> )          |
| TERG_11641 | 1.62 | forkhead transcription factor ( <i>T. tonsurans</i> )                    |
| TERG_08924 | 1.62 | MIZ zinc finger domain protein ( <i>A. benhamiae</i> )                   |
| TERG_07957 | 1.62 | hypothetical protein                                                     |
| TERG_07346 | 1.61 | tRNA ligase ( <i>M. gypseum</i> )                                        |
| TERG_05367 | 1.61 | nucleolar complex-associated protein 3 ( <i>T. equinum</i> )             |
| TERG_12609 | 1.61 | hypothetical protein                                                     |
| TERG_00909 | 1.61 | hypothetical protein                                                     |
| TERG_00139 | 1.61 | MADS box transcription factor ( <i>T. tonsurans</i> )                    |
| TERG_01907 | 1.61 | hypothetical protein                                                     |
| TERG_08216 | 1.60 | ATP-dependent RNA helicase dbp6 ( <i>T. equinum</i> )                    |
| TERG_01930 | 1.60 | hypothetical protein                                                     |
| TERG_12374 | 1.59 | UDP-N-acetylglucosaminyltransferase ( <i>T. equinum</i> )                |
| TERG_03134 | 1.59 | hypothetical protein                                                     |
| TERG_02400 | 1.59 | amino acid transporter, putative ( <i>A. benhamiae</i> )                 |
| TERG_01954 | 1.59 | hypothetical protein                                                     |
| TERG_02549 | 1.59 | hypothetical protein                                                     |
| TERG_05520 | 1.59 | hypothetical protein                                                     |
| TERG_01129 | 1.59 | cell wall glucanase (Scw4), putative ( <i>A. benhamiae</i> )             |
| TERG_12307 | 1.58 | autophagy protein ( <i>T. tonsurans</i> )                                |
| TERG_01101 | 1.58 | hypothetical protein                                                     |
| TERG_02101 | 1.58 | amino-acid transporter Arg-13 ( <i>T. equinum</i> )                      |
| TERG_04135 | 1.57 | DNA-directed RNA polymerase III subunit RPC2 ( <i>T. equinum</i> )       |
| TERG_06164 | 1.57 | MYB family conidiophore development protein FlbD ( <i>T. equinum</i> )   |
| TERG_05936 | 1.57 | AMID-like mitochondrial oxidoreductase, putative ( <i>A. benhamiae</i> ) |
| TERG_03429 | 1.57 | DNA directed RNA polymerase II 15 kDa subunit ( <i>T. tonsurans</i> )    |
| TERG_02643 | 1.57 | 60S ribosomal protein L20 ( <i>T. tonsurans</i> )                        |
| TERG_08497 | 1.57 | mRNA turnover protein 4 ( <i>T. equinum</i> )                            |
| TERG_07978 | 1.56 | hypothetical protein                                                     |

|            |       |                                                                                 |
|------------|-------|---------------------------------------------------------------------------------|
| TERG_03522 | 1.56  | purine-cytosine permease, putative ( <i>A. benhamiae</i> )                      |
| TERG_08540 | 1.55  | rRNA-processing protein FCF1 ( <i>T. equinum</i> )                              |
| TERG_12672 | 1.55  | hypothetical protein                                                            |
| TERG_03312 | 1.55  | RTA1 domain protein, putative ( <i>A. benhamiae</i> )                           |
| TERG_03843 | 1.55  | chitin synthase B                                                               |
| TERG_08276 | 1.55  | tRNA splicing endonuclease subunit (Sen54), putative ( <i>A. benhamiae</i> )    |
| TERG_00162 | 1.55  | MFS multidrug transporter, putative ( <i>A. benhamiae</i> )                     |
| TERG_12065 | 1.55  | hypothetical protein                                                            |
| TERG_03704 | 1.54  | integral membrane protein Pth11-like, putative ( <i>T. verrucosum</i> )         |
| TERG_05085 | 1.54  | Ndc80 complex component Nuf2 ( <i>T. tonsurans</i> )                            |
| TERG_08096 | 1.52  | RNA splicing factor ( <i>T. tonsurans</i> )                                     |
| TERG_01741 | 1.52  | hypothetical protein                                                            |
| TERG_07999 | 1.52  | hypothetical protein                                                            |
| TERG_02508 | 1.51  | ABC multidrug transporter, putative ( <i>A. benhamiae</i> )                     |
| TERG_08686 | 1.51  | hypothetical protein                                                            |
| TERG_04024 | 1.51  | carbamoyl-phosphate synthase arginine-specific small chain                      |
| TERG_03602 | 1.51  | Polysaccharide deacetylase ( <i>T. tonsurans</i> )                              |
| TERG_02278 | 1.51  | hypothetical protein                                                            |
| TERG_03790 | 1.50  | DUF1275 domain-containing protein ( <i>T. equinum</i> )                         |
| TERG_06611 | 1.50  | hypothetical protein                                                            |
| TERG_08240 | 1.50  | methyltransferase, putative ( <i>T. verrucosum</i> )                            |
| TERG_07784 | -1.50 | hypothetical protein                                                            |
| TERG_01177 | -1.50 | cytochrome P450 51 ( <i>T. equinum</i> )                                        |
| TERG_00689 | -1.50 | AUR protein kinase                                                              |
| TERG_04412 | -1.50 | DNA replication factor C subunit Rfc3 ( <i>T. equinum</i> )                     |
| TERG_07804 | -1.51 | PBSP domain-containing protein ( <i>T. tonsurans</i> )                          |
| TERG_01624 | -1.52 | phosphomannomutase ( <i>T. tonsurans</i> )                                      |
| TERG_12626 | -1.53 | C-5 sterol desaturase ( <i>T. equinum</i> )                                     |
| TERG_12305 | -1.53 | C6 transcription factor, putative ( <i>T. verrucosum</i> )                      |
| TERG_02912 | -1.53 | MFS transporter, putative ( <i>A. benhamiae</i> )                               |
| TERG_02481 | -1.53 | F-box domain-containing protein ( <i>M. canis</i> )                             |
| TERG_01091 | -1.53 | magnesium-dependent phosphatase-1                                               |
| TERG_05903 | -1.54 | hypothetical protein                                                            |
| TERG_05809 | -1.55 | hypothetical protein                                                            |
| TERG_05136 | -1.55 | cytochrome P450 oxidoreductase GliC ( <i>A. benhamiae</i> )                     |
| TERG_12517 | -1.55 | phosphotransferase enzyme family protein ( <i>T. equinum</i> )                  |
| TERG_12253 | -1.56 | RNA polymerase II Mediator complex subunit Sin4 ( <i>T. equinum</i> )           |
| TERG_02363 | -1.56 | succinate-semialdehyde dehydrogenase ( <i>T. tonsurans</i> )                    |
| TERG_06598 | -1.56 | hypothetical protein                                                            |
| TERG_12490 | -1.56 | hypothetical protein                                                            |
| TERG_01895 | -1.58 | pheromone processing carboxypeptidase (Sxa2), putative ( <i>T. verrucosum</i> ) |
| TERG_07691 | -1.58 | sterol carrier protein ( <i>T. tonsurans</i> )                                  |
| TERG_07798 | -1.59 | hypothetical protein                                                            |

## Supplementary Material

|            |       |                                                                                      |
|------------|-------|--------------------------------------------------------------------------------------|
| TERG_02007 | -1.59 | enoyl-CoA hydratase/isomerase family protein ( <i>T. verrucosum</i> )                |
| TERG_00441 | -1.59 | peptidyl-prolyl cis-trans isomerase pin4                                             |
| TERG_07963 | -1.59 | hypothetical protein                                                                 |
| TERG_05879 | -1.60 | GPI mannosyltransferase ( <i>T. tonsurans</i> )                                      |
| TERG_12291 | -1.60 | mitochondrial cytochrome b2 ( <i>T. tonsurans</i> )                                  |
| TERG_01295 | -1.60 | oxidoreductase, short-chain dehydrogenase/reductase family ( <i>T. verrucosum</i> )  |
| TERG_02921 | -1.60 | hypothetical protein                                                                 |
| TERG_01957 | -1.60 | proteinase T ( <i>M. gypseum</i> )                                                   |
| TERG_06415 | -1.60 | hypothetical protein                                                                 |
| TERG_07230 | -1.60 | MFS monosaccharide transporter, putative ( <i>A. benhamiae</i> )                     |
| TERG_07485 | -1.60 | UDP-galactopyranose mutase ( <i>T. equinum</i> )                                     |
| TERG_02004 | -1.61 | ureidoglycolate hydrolase, putative ( <i>T. verrucosum</i> )                         |
| TERG_11774 | -1.61 | hypothetical protein                                                                 |
| TERG_02249 | -1.62 | phenylacetyl-CoA ligase ( <i>T. tonsurans</i> )                                      |
| TERG_06760 | -1.62 | ATP binding L-PSP endoribonuclease family protein, putative ( <i>T. verrucosum</i> ) |
| TERG_00487 | -1.63 | hypothetical protein                                                                 |
| TERG_00824 | -1.64 | neutral trehalase                                                                    |
| TERG_12087 | -1.64 | hypothetical protein                                                                 |
| TERG_04247 | -1.65 | CMGC/SRPK protein kinase                                                             |
| TERG_02699 | -1.65 | protein kinase, putative ( <i>T. verrucosum</i> )                                    |
| TERG_00199 | -1.66 | serine/threonine protein kinase                                                      |
| TERG_02988 | -1.66 | asparaginase ( <i>T. tonsurans</i> )                                                 |
| TERG_07037 | -1.66 | hypothetical protein                                                                 |
| TERG_03985 | -1.66 | hypothetical protein                                                                 |
| TERG_04769 | -1.67 | extracellular serine carboxypeptidase, putative ( <i>T. verrucosum</i> )             |
| TERG_05153 | -1.68 | MFS transporter, putative ( <i>A. benhamiae</i> )                                    |
| TERG_12075 | -1.68 | hypothetical protein                                                                 |
| TERG_00881 | -1.69 | zinc-containing alcohol dehydrogenase, putative ( <i>T. verrucosum</i> )             |
| TERG_04857 | -1.69 | ribose 5-phosphate isomerase                                                         |
| TERG_11816 | -1.69 | OPT peptide transporter Mtd1, putative ( <i>T. verrucosum</i> )                      |
| TERG_00550 | -1.69 | hypothetical protein                                                                 |
| TERG_11522 | -1.69 | hypothetical protein                                                                 |
| TERG_03102 | -1.69 | sterol 24-C-methyltransferase ( <i>T. equinum</i> )                                  |
| TERG_01259 | -1.70 | hypothetical protein                                                                 |
| TERG_03619 | -1.70 | transcription factor Tos4 ( <i>T. equinum</i> )                                      |
| TERG_06712 | -1.71 | mitochondrial methylglutaconyl-CoA hydratase ( <i>T. tonsurans</i> )                 |
| TERG_12129 | -1.72 | hypothetical protein                                                                 |
| TERG_01732 | -1.72 | amidohydrolase ( <i>T. equinum</i> )                                                 |
| TERG_11807 | -1.72 | protein kinase subdomain-containing protein ( <i>T. tonsurans</i> )                  |
| TERG_01754 | -1.73 | oxidoreductase, 2-nitropropane dioxygenase family, putative ( <i>A. benhamiae</i> )  |
| TERG_12725 | -1.74 | MFS transporter ( <i>T. equinum</i> )                                                |



|            |       |                                                                   |
|------------|-------|-------------------------------------------------------------------|
| TERG_03464 | -1.74 | stress response protein ( <i>T. equinum</i> )                     |
| TERG_03747 | -1.74 | phospholipase A2 ( <i>T. equinum</i> )                            |
| TERG_05841 | -1.76 | AmmeMemoRadiSam system protein B                                  |
| TERG_05579 | -1.77 | FAD dependent oxidoreductase, putative ( <i>A. benhamiae</i> )    |
| TERG_07045 | -1.78 | hypothetical protein                                              |
| TERG_06980 | -1.78 | hypothetical protein                                              |
| TERG_11814 | -1.78 | FAD dependent oxidoreductase, putative ( <i>A. benhamiae</i> )    |
| TERG_06276 | -1.79 | chromate ion transporter ( <i>T. tonsurans</i> )                  |
| TERG_03318 | -1.80 | N(5)-glutamine methyltransferase MTQ2 ( <i>T. equinum</i> )       |
| TERG_06663 | -1.80 | dienelactone hydrolase ( <i>T. equinum</i> )                      |
| TERG_11808 | -1.81 | protein kinase subdomain-containing protein ( <i>T. equinum</i> ) |
| TERG_07597 | -1.82 | SOK1 ( <i>T. equinum</i> )                                        |
| TERG_07412 | -1.82 | cell division control protein 45                                  |
| TERG_02381 | -1.83 | vacuolar protein sorting protein 62 ( <i>M. gypseum</i> )         |
| TERG_03700 | -1.84 | hypothetical protein                                              |
| TERG_07721 | -1.85 | isopenicillin N-CoA epimerase ( <i>T. equinum</i> )               |
| TERG_04669 | -1.85 | hypothetical protein                                              |
| TERG_04684 | -1.86 | shugoshin family protein ( <i>A. benhamiae</i> )                  |
| TERG_03808 | -1.87 | hypothetical protein                                              |
| TERG_02005 | -1.88 | catalase ( <i>T. tonsurans</i> )                                  |
| TERG_00202 | -1.89 | hypothetical protein                                              |
| TERG_00620 | -1.90 | NAD <sup>+</sup> kinase Utr1 ( <i>T. equinum</i> )                |
| TERG_06879 | -1.91 | acetamidase ( <i>T. verrucosum</i> )                              |
| TERG_04288 | -1.92 | hypothetical protein                                              |
| TERG_00168 | -1.93 | hypothetical protein                                              |
| TERG_05137 | -1.94 | microsomal dipeptidase ( <i>T. tonsurans</i> )                    |
| TERG_08070 | -1.95 | enoyl-CoA hydratase/isomerase ( <i>T. tonsurans</i> )             |
| TERG_01384 | -1.96 | C6 finger domain-containing protein ( <i>T. equinum</i> )         |
| TERG_01164 | -1.97 | beta-alanine synthase, putative ( <i>T. verrucosum</i> )          |
| TERG_07510 | -1.98 | hypothetical protein                                              |
| TERG_03541 | -2.00 | hypothetical protein                                              |
| TERG_05878 | -2.00 | translin family protein ( <i>T. tonsurans</i> )                   |
| TERG_11601 | -2.00 | hypothetical protein                                              |
| TERG_12511 | -2.00 | MFS multidrug transporter ( <i>T. equinum</i> )                   |
| TERG_01606 | -2.02 | peptidase, putative ( <i>A. benhamiae</i> )                       |
| TERG_01950 | -2.02 | serine/threonine protein kinase ( <i>T. tonsurans</i> )           |
| TERG_06638 | -2.05 | endochitinase ( <i>T. equinum</i> )                               |
| TERG_05138 | -2.06 | PE-PGRS family protein ( <i>T. equinum</i> )                      |
| TERG_01367 | -2.07 | hypothetical protein                                              |
| TERG_12518 | -2.09 | phosphotransferase enzyme family protein ( <i>T. equinum</i> )    |
| TERG_07300 | -2.09 | hypothetical protein                                              |
| TERG_00609 | -2.09 | ankyrin repeat protein ( <i>T. equinum</i> )                      |
| TERG_06160 | -2.10 | nitrite reductase, copper-containing                              |
| TERG_06285 | -2.15 | hypothetical protein                                              |

|            |       |                                                                             |
|------------|-------|-----------------------------------------------------------------------------|
| TERG_02264 | -2.15 | hypothetical protein                                                        |
| TERG_02588 | -2.19 | hypothetical protein                                                        |
| TERG_02078 | -2.24 | thiamine biosynthesis protein Nmt1 ( <i>T. equinum</i> )                    |
| TERG_05424 | -2.26 | hypothetical protein                                                        |
| TERG_11813 | -2.28 | FAD dependent oxidoreductase, putative ( <i>A. benhamiae</i> )              |
| TERG_08861 | -2.33 | hypothetical protein                                                        |
| TERG_03027 | -2.38 | hypothetical protein                                                        |
| TERG_04213 | -2.39 | TAM domain methyltransferase ( <i>T. equinum</i> )                          |
| TERG_02746 | -2.40 | hypothetical protein                                                        |
| TERG_07960 | -2.41 | hypothetical protein                                                        |
| TERG_00466 | -2.42 | SirB protein ( <i>T. equinum</i> )                                          |
| TERG_00429 | -2.45 | pisatin demethylase ( <i>M. gypseum</i> )                                   |
| TERG_04791 | -2.47 | hypothetical protein                                                        |
| TERG_06522 | -2.49 | FMN dependent dehydrogenase, putative ( <i>T. verrucosum</i> )              |
| TERG_06053 | -2.51 | catalase ( <i>T. tonsurans</i> )                                            |
| TERG_02589 | -2.61 | formamidase ( <i>T. equinum</i> )                                           |
| TERG_08158 | -2.78 | hypothetical protein                                                        |
| TERG_11852 | -2.86 | glyoxalase family protein ( <i>T. verrucosum</i> )                          |
| TERG_06883 | -2.87 | NAD dependent epimerase/dehydratase family protein ( <i>T. verrucosum</i> ) |
| TERG_05799 | -2.87 | chlorophyll synthesis pathway protein BchC                                  |
| TERG_07769 | -2.93 | hypothetical protein                                                        |
| TERG_08283 | -3.00 | acetamidase ( <i>T. tonsurans</i> )                                         |
| TERG_07231 | -3.00 | hemolysin-III family protein ( <i>T. equinum</i> )                          |
| TERG_11822 | -3.06 | peroxisome biosynthesis protein ( <i>T. tonsurans</i> )                     |
| TERG_01480 | -3.14 | MFS multidrug transporter, putative ( <i>A. benhamiae</i> )                 |
| TERG_04764 | -3.62 | MFS transporter ( <i>T. tonsurans</i> )                                     |
| TERG_05409 | -3.64 | FAD dependent oxidoreductase ( <i>T. equinum</i> )                          |

Gene expression values are expressed in log<sub>2</sub> fold change.

| ID         | 24 hours | 48 hours | 96 hours | Gene Product Name                                                     |
|------------|----------|----------|----------|-----------------------------------------------------------------------|
| TERG_04464 |          |          | 5.98     | hypothetical protein                                                  |
| TERG_04551 |          |          | 5.13     | hypothetical protein                                                  |
| TERG_03919 |          |          | 4.59     | phytoene dehydrogenase ( <i>T. equinum</i> )                          |
| TERG_12042 |          |          | 3.70     | RNA helicase/RNase III, putative ( <i>A. benhamiae</i> )              |
| TERG_04254 |          |          | 3.55     | oxidoreductase ( <i>T. equinum</i> )                                  |
| TERG_00016 |          |          | 3.45     | methionine-R-sulfoxide reductase                                      |
| TERG_01291 |          |          | 3.30     | Rad21/Rec8 N terminal domain protein ( <i>A. benhamiae</i> )          |
| TERG_08585 |          |          | 3.25     | ankyrin repeat protein ( <i>A. benhamiae</i> )                        |
| TERG_12604 |          |          | 2.94     | hypothetical protein                                                  |
| TERG_04960 |          |          | 2.80     | glutathione S-transferase Ure2-like, putative ( <i>A. benhamiae</i> ) |
| TERG_01153 |          |          | 2.76     | hypothetical protein                                                  |

|            |                                                                               |
|------------|-------------------------------------------------------------------------------|
| TERG_04724 | 2.67 hypothetical protein                                                     |
| TERG_11792 | 2.62 hypothetical protein                                                     |
| TERG_08163 | 2.61 hypothetical protein                                                     |
| TERG_08576 | 2.59 carboxylesterase ( <i>T. tonsurans</i> )                                 |
| TERG_04907 | 2.57 glyoxalase ( <i>T. tonsurans</i> )                                       |
| TERG_00386 | 2.56 hypothetical protein                                                     |
| TERG_01155 | 2.53 hypothetical protein                                                     |
| TERG_12078 | 2.47 hypothetical protein                                                     |
| TERG_03599 | 2.47 metalloproteinase ( <i>T. equinum</i> )                                  |
| TERG_04784 | 2.46 hypothetical protein                                                     |
| TERG_03722 | 2.45 hypothetical protein                                                     |
| TERG_00490 | 2.40 erythromycin esterase ( <i>T. tonsurans</i> )                            |
| TERG_01445 | 2.31 hypothetical protein                                                     |
| TERG_12469 | 2.26 hypothetical protein                                                     |
| TERG_05650 | 2.23 blasticidin-resistance protein ( <i>T. tonsurans</i> )                   |
| TERG_02024 | 2.22 hypothetical protein                                                     |
| TERG_07031 | 2.19 hypothetical protein                                                     |
| TERG_08076 | 2.17 integral membrane protein ( <i>T. equinum</i> )                          |
| TERG_07040 | 2.16 MFS drug efflux transporter ( <i>T. equinum</i> )                        |
| TERG_12653 | 2.11 hypothetical protein                                                     |
| TERG_06128 | 2.10 phosphoribosylglycinamide formyltransferase                              |
| TERG_06872 | 2.05 hypothetical protein                                                     |
| TERG_02012 | 2.01 adenosine deaminase family protein ( <i>A. benhamiae</i> )               |
| TERG_07818 | 2.00 hypothetical protein                                                     |
| TERG_12070 | 2.00 hypothetical protein                                                     |
| TERG_01319 | 2.00 hypothetical protein                                                     |
| TERG_01920 | 1.99 hypothetical protein                                                     |
| TERG_12487 | 1.95 nonribosomal brevianamide peptide synthase FtmA ( <i>T. verrucosum</i> ) |
| TERG_03877 | 1.94 cytochrome P450 monooxygenase, putative ( <i>T. verrucosum</i> )         |
| TERG_00910 | 1.90 phosphotransferase enzyme family protein ( <i>T. equinum</i> )           |
| TERG_04126 | 1.88 dual specificity phosphatase ( <i>T. equinum</i> )                       |
| TERG_04750 | 1.87 hypothetical protein                                                     |
| TERG_08211 | 1.85 acetyltransferase, GNAT family, putative ( <i>A. benhamiae</i> )         |
| TERG_12069 | 1.85 hypothetical protein                                                     |
| TERG_00031 | 1.83 hypothetical protein                                                     |
| TERG_04931 | 1.82 allantoate permease ( <i>T. equinum</i> )                                |
| TERG_06540 | 1.82 glutathione transferase ( <i>T. tonsurans</i> )                          |
| TERG_05266 | 1.82 integral membrane protein ( <i>T. equinum</i> )                          |
| TERG_03004 | 1.81 3-methyl-2-oxobutanoate hydroxymethyltransferase                         |
| TERG_01619 | 1.80 toxin biosynthesis protein (Tri7), putative ( <i>T. verrucosum</i> )     |
| TERG_11974 | 1.80 hypothetical protein                                                     |
| TERG_05938 | 1.80 tetratricopeptide repeat domain-containing protein ( <i>T. equinum</i> ) |
| TERG_07170 | 1.78 MFS transporter, putative ( <i>A. benhamiae</i> )                        |
| TERG_06838 | 1.76 oxalate/formate antiporter, putative ( <i>T. verrucosum</i> )            |

|            |                                                                                                |
|------------|------------------------------------------------------------------------------------------------|
| TERG_02100 | 1.75 cytidine deaminase                                                                        |
| TERG_08756 | 1.73 cercosporin toxin biosynthesis protein ( <i>T. equinum</i> )                              |
| TERG_08591 | 1.73 multidrug resistance protein ( <i>T. tonsurans</i> )                                      |
| TERG_12652 | 1.72 hypothetical protein                                                                      |
| TERG_02306 | 1.71 integral membrane protein ( <i>T. equinum</i> )                                           |
| TERG_06048 | 1.71 tryptophan dimethylallyltransferase ( <i>T. tonsurans</i> )                               |
| TERG_04224 | 1.70 ABC transporter                                                                           |
| TERG_07786 | 1.70 NAP family protein ( <i>T. equinum</i> )                                                  |
| TERG_00316 | 1.69 hypothetical protein                                                                      |
| TERG_12010 | 1.67 alpha/beta hydrolase ( <i>T. equinum</i> )                                                |
| TERG_08951 | 1.65 hypothetical protein                                                                      |
| TERG_05652 | 1.64 leucine aminopeptidase 1                                                                  |
| TERG_05814 | 1.64 hypothetical protein                                                                      |
| TERG_04060 | 1.64 C2H2 type zinc finger domain-containing protein ( <i>T. equinum</i> )                     |
| TERG_06622 | 1.63 hydrolase ( <i>T. tonsurans</i> )                                                         |
| TERG_03857 | 1.61 phosphotransferase enzyme family protein ( <i>T. equinum</i> )                            |
| TERG_00257 | 1.61 conserved predicted protein ( <i>A. benhamiae</i> )                                       |
| TERG_07758 | 1.61 hypothetical protein                                                                      |
| TERG_12334 | 1.59 hypothetical protein                                                                      |
| TERG_07386 | 1.57 vacuolar membrane PQ loop repeat protein ( <i>T. tonsurans</i> )                          |
| TERG_07627 | 1.55 hypothetical protein                                                                      |
| TERG_05561 | 1.55 histone acetyltransferase GCN5 ( <i>T. tonsurans</i> )                                    |
| TERG_02031 | 1.54 methylenetetrahydrofolate dehydrogenase ( <i>T. equinum</i> )                             |
| TERG_06997 | -1.51 C6 transcription factor ( <i>T. tonsurans</i> )                                          |
| TERG_08101 | -1.51 TAM domain methyltransferase ( <i>T. equinum</i> )                                       |
| TERG_01026 | -1.51 kelch-domain-containing protein ( <i>T. tonsurans</i> )                                  |
| TERG_07547 | -1.51 RGS domain-containing protein ( <i>T. tonsurans</i> )                                    |
| TERG_05744 | -1.52 GTP-binding protein EsdC ( <i>T. equinum</i> )                                           |
| TERG_08141 | -1.52 bZIP transcription factor (LziP), putative ( <i>A. benhamiae</i> )                       |
| TERG_01126 | -1.53 1,3-beta-glucanosyltransferase, putative ( <i>T. verrucosum</i> )                        |
| TERG_03032 | -1.54 autophagy protein Atg13, putative ( <i>A. benhamiae</i> )                                |
| TERG_07197 | -1.55 disintegrin and metalloproteinase domain-containing protein B                            |
| TERG_02311 | -1.56 hypothetical protein                                                                     |
| TERG_00786 | -1.56 hypothetical protein                                                                     |
| TERG_03322 | -1.56 hypothetical protein                                                                     |
| TERG_00146 | -1.56 phospholipid-translocating P-type ATPase domain-containing protein ( <i>T. equinum</i> ) |
| TERG_02565 | -1.56 sulfate transporter ( <i>T. equinum</i> )                                                |
| TERG_01127 | -1.56 1,3-beta-glucan synthase component FKS1                                                  |
| TERG_02116 | -1.57 PX domain-containing protein ( <i>T. tonsurans</i> )                                     |
| TERG_04743 | -1.57 C6 finger domain protein, putative ( <i>A. benhamiae</i> )                               |
| TERG_11541 | -1.57 hypothetical protein                                                                     |
| TERG_03492 | -1.59 oxalate decarboxylase, putative ( <i>A. benhamiae</i> )                                  |
| TERG_11836 | -1.59 choline transporter Hnm1, putative ( <i>T. verrucosum</i> )                              |

|            |                                                                                            |
|------------|--------------------------------------------------------------------------------------------|
| TERG_11845 | -1.60 RNA polymerase II mediator complex component Srb8, putative ( <i>T. verrucosum</i> ) |
| TERG_03187 | -1.60 aspartate aminotransferase ( <i>T. tonsurans</i> )                                   |
| TERG_05576 | -1.61 cell wall glucanase (Scw11), putative ( <i>A. benhamiae</i> )                        |
| TERG_06998 | -1.61 3-ketoacyl-acyl carrier protein reductase ( <i>T. tonsurans</i> )                    |
| TERG_11567 | -1.62 hypothetical protein                                                                 |
| TERG_11647 | -1.62 phosphatidylserine decarboxylase                                                     |
| TERG_11730 | -1.62 hypothetical protein                                                                 |
| TERG_04594 | -1.63 porin ( <i>T. tonsurans</i> )                                                        |
| TERG_02385 | -1.63 hypothetical protein                                                                 |
| TERG_11955 | -1.64 long-chain-fatty-acid-CoA ligase 1 ( <i>M. gypseum</i> )                             |
| TERG_02566 | -1.64 hypothetical protein                                                                 |
| TERG_08938 | -1.65 thermoresistant gluconokinase ( <i>T. tonsurans</i> )                                |
| TERG_02567 | -1.65 phytanoyl-CoA dioxygenase ( <i>T. tonsurans</i> )                                    |
| TERG_06994 | -1.65 hypothetical protein                                                                 |
| TERG_07266 | -1.65 zinc finger protein 273 ( <i>M. gypseum</i> )                                        |
| TERG_11566 | -1.65 hypothetical protein                                                                 |
| TERG_08824 | -1.65 hypothetical protein                                                                 |
| TERG_00330 | -1.67 hypothetical protein                                                                 |
| TERG_02694 | -1.67 sulfite efflux pump SSU1                                                             |
| TERG_03234 | -1.67 DUF907 domain-containing protein ( <i>T. equinum</i> )                               |
| TERG_00616 | -1.67 potassium/sodium efflux P-type ATPase, fungal-type                                   |
| TERG_03069 | -1.67 hypothetical protein                                                                 |
| TERG_01988 | -1.67 F-box domain protein ( <i>A. benhamiae</i> )                                         |
| TERG_04206 | -1.67 AT DNA binding protein ( <i>T. equinum</i> )                                         |
| TERG_07121 | -1.68 hypothetical protein                                                                 |
| TERG_06366 | -1.68 CAMK protein kinase                                                                  |
| TERG_05604 | -1.68 C6 finger domain-containing protein ( <i>T. equinum</i> )                            |
| TERG_04582 | -1.68 extracellular cellulase CelA/allergen Asp F7-like, putative ( <i>T. verrucosum</i> ) |
| TERG_00730 | -1.69 phospholipid metabolism enzyme regulator, putative ( <i>T. verrucosum</i> )          |
| TERG_02059 | -1.69 AbpA protein ( <i>T. equinum</i> )                                                   |
| TERG_03969 | -1.69 hypothetical protein                                                                 |
| TERG_06695 | -1.70 hypothetical protein                                                                 |
| TERG_01758 | -1.70 C2 domain-containing protein ( <i>T. tonsurans</i> )                                 |
| TERG_00613 | -1.70 hypothetical protein                                                                 |
| TERG_11595 | -1.72 LipA and NB-ARC domain-containing protein ( <i>M. canis</i> )                        |
| TERG_07820 | -1.72 phospholipase ( <i>T. tonsurans</i> )                                                |
| TERG_06779 | -1.72 hypothetical protein                                                                 |
| TERG_00853 | -1.72 choline transporter ( <i>T. equinum</i> )                                            |
| TERG_00917 | -1.72 aureobasidin A resistance protein ( <i>T. equinum</i> )                              |
| TERG_03059 | -1.72 hypothetical protein                                                                 |
| TERG_06383 | -1.75 homeobox domain-containing protein ( <i>T. equinum</i> )                             |
| TERG_12724 | -1.75 nonribosomal peptide synthase GliP ( <i>A. benhamiae</i> )                           |
| TERG_01049 | -1.75 hypothetical protein                                                                 |

|            |                                                                            |
|------------|----------------------------------------------------------------------------|
| TERG_06990 | -1.75 hypothetical protein                                                 |
| TERG_07958 | -1.75 myosin class II heavy chain (MHC), putative ( <i>T. verrucosum</i> ) |
| TERG_00863 | -1.75 NsdD ( <i>T. equinum</i> )                                           |
| TERG_07469 | -1.77 SUN domain-containing protein ( <i>T. equinum</i> )                  |
| TERG_06290 | -1.77 hypothetical protein                                                 |
| TERG_11648 | -1.78 phosphatidylserine decarboxylase ( <i>T. tonsurans</i> )             |
| TERG_01397 | -1.78 C2H2 finger domain-containing protein ( <i>T. equinum</i> )          |
| TERG_07391 | -1.79 hypothetical protein                                                 |
| TERG_07720 | -1.79 copper-transporting ATPase ( <i>T. equinum</i> )                     |
| TERG_07681 | -1.79 sexual development activator VeA ( <i>T. verrucosum</i> )            |
| TERG_12086 | -1.80 hypothetical protein                                                 |
| TERG_05977 | -1.80 hypothetical protein                                                 |
| TERG_01934 | -1.80 C2H2 finger domain-containing protein ( <i>T. equinum</i> )          |
| TERG_01967 | -1.81 GPI anchored protein, putative ( <i>T. verrucosum</i> )              |
| TERG_04324 | -1.81 extracellular metalloproteinase 4                                    |
| TERG_01898 | -1.83 hypothetical protein                                                 |
| TERG_05885 | -1.84 DnaJ domain-containing protein ( <i>T. equinum</i> )                 |
| TERG_08825 | -1.84 bZIP transcription factor JIbA/IDI-4 ( <i>T. verrucosum</i> )        |
| TERG_01012 | -1.84 hypothetical protein                                                 |
| TERG_01749 | -1.85 hypothetical protein                                                 |
| TERG_08140 | -1.86 methyltransferase type 11 ( <i>M. gypseum</i> )                      |
| TERG_06359 | -1.87 hypothetical protein                                                 |
| TERG_02584 | -1.87 hypothetical protein                                                 |
| TERG_01313 | -1.87 C2H2 finger domain-containing protein ( <i>T. equinum</i> )          |
| TERG_02468 | -1.88 ubiquitin thiolesterase (OtuB1), putative ( <i>T. verrucosum</i> )   |
| TERG_12645 | -1.88 hypothetical protein                                                 |
| TERG_02185 | -1.88 hypothetical protein                                                 |
| TERG_08405 | -1.88 leucine aminopeptidase 2                                             |
| TERG_00315 | -1.88 RAN protein kinase                                                   |
| TERG_00694 | -1.88 glutamate 5-kinase                                                   |
| TERG_11729 | -1.89 hypothetical protein                                                 |
| TERG_03211 | -1.90 actin cytoskeleton protein ( <i>T. tonsurans</i> )                   |
| TERG_05626 | -1.90 chitinase ( <i>T. equinum</i> )                                      |
| TERG_02891 | -1.90 hypothetical protein                                                 |
| TERG_03334 | -1.92 sensor histidine kinase/response regulator ( <i>T. tonsurans</i> )   |
| TERG_02593 | -1.93 C2H2 finger domain protein, putative ( <i>T. verrucosum</i> )        |
| TERG_01851 | -1.93 Pfs, NACHT and WD domain protein ( <i>A. benhamiae</i> )             |
| TERG_12126 | -1.94 hypothetical protein                                                 |
| TERG_00981 | -1.95 hypothetical protein                                                 |
| TERG_04925 | -1.95 hypothetical protein                                                 |
| TERG_04278 | -1.95 hypothetical protein                                                 |
| TERG_05824 | -1.97 hypothetical protein                                                 |
| TERG_12640 | -1.97 choriogenin Hminor ( <i>M. canis</i> )                               |

|            |                                                                                              |
|------------|----------------------------------------------------------------------------------------------|
| TERG_07931 | -1.97 vesicle-mediated transport protein Vid24 ( <i>T. equinum</i> )                         |
| TERG_06778 | -1.98 PAP2 domain protein ( <i>T. verrucosum</i> )                                           |
| TERG_08298 | -1.99 RTA1 domain-containing protein ( <i>T. equinum</i> )                                   |
| TERG_07968 | -1.99 hypothetical protein                                                                   |
| TERG_01985 | -1.99 hypothetical protein                                                                   |
| TERG_08191 | -1.99 glucooligosaccharide oxidase ( <i>T. equinum</i> )                                     |
| TERG_03253 | -2.00 hypothetical protein                                                                   |
| TERG_01433 | -2.01 WD domain, G-beta repeat protein ( <i>A. benhamiae</i> )                               |
| TERG_06144 | -2.01 cell wall serine-threonine-rich galactomannoprotein Mp1 ( <i>A. benhamiae</i> )        |
| TERG_08959 | -2.01 hypothetical protein                                                                   |
| TERG_00084 | -2.01 chromosome segregation protein (Pcs1), putative ( <i>T. verrucosum</i> )               |
| TERG_03110 | -2.02 GTPase activating protein (Gyp3), putative ( <i>A. benhamiae</i> )                     |
| TERG_05492 | -2.02 hypothetical protein                                                                   |
| TERG_12646 | -2.02 hypothetical protein                                                                   |
| TERG_04877 | -2.03 pH response protein PalF ( <i>T. tonsurans</i> )                                       |
| TERG_02800 | -2.06 conidiation-specific protein 10                                                        |
| TERG_04862 | -2.07 C6 transcription factor RosA ( <i>A. benhamiae</i> )                                   |
| TERG_05303 | -2.09 phospholipase PldA, putative ( <i>T. verrucosum</i> )                                  |
| TERG_12371 | -2.11 hypothetical protein                                                                   |
| TERG_11506 | -2.16 phosphoenolpyruvate carboxykinase [ATP]                                                |
| TERG_08987 | -2.17 hypothetical protein                                                                   |
| TERG_08801 | -2.19 hypothetical protein                                                                   |
| TERG_00967 | -2.19 hypothetical protein                                                                   |
| TERG_01900 | -2.21 aquaglyceroporin, putative ( <i>A. benhamiae</i> )                                     |
| TERG_02569 | -2.22 conserved serine proline-rich protein ( <i>A. benhamiae</i> )                          |
| TERG_08777 | -2.23 hypothetical protein                                                                   |
| TERG_04930 | -2.25 glucose 1-dehydrogenase 2 ( <i>M. gypseum</i> )                                        |
| TERG_04146 | -2.26 FAD/FMN-containing isoamyl alcohol oxidase MreA-like, putative ( <i>A. benhamiae</i> ) |
| TERG_00811 | -2.26 C-x8-C-x5-C-x3-H type zinc finger protein ( <i>T. equinum</i> )                        |
| TERG_12639 | -2.26 choriogenin Hminor ( <i>M. canis</i> )                                                 |
| TERG_04942 | -2.27 hypothetical protein                                                                   |
| TERG_06355 | -2.28 acetyltransferase, GNAT family ( <i>A. benhamiae</i> )                                 |
| TERG_05490 | -2.28 hypothetical protein                                                                   |
| TERG_01869 | -2.29 TOS1 ( <i>T. equinum</i> )                                                             |
| TERG_04281 | -2.40 woronin body major protein                                                             |
| TERG_02179 | -2.41 keylime pathogenicity protein ( <i>M. canis</i> )                                      |
| TERG_00453 | -2.42 PXA domain-containing protein ( <i>T. tonsurans</i> )                                  |
| TERG_11505 | -2.43 phosphoenolpyruvate carboxykinase [ATP]                                                |
| TERG_08503 | -2.49 secalin ( <i>M. canis</i> )                                                            |
| TERG_02814 | -2.49 hypothetical protein                                                                   |
| TERG_00517 | -2.50 hypothetical protein                                                                   |
| TERG_03771 | -2.52 ankyrin repeat protein ( <i>T. verrucosum</i> )                                        |
| TERG_02384 | -2.53 hypothetical protein                                                                   |

|            |       |                                                                   |
|------------|-------|-------------------------------------------------------------------|
| TERG_03966 | -2.54 | hypothetical protein                                              |
| TERG_00765 | -2.58 | hypothetical protein                                              |
| TERG_07199 | -2.65 | hypothetical protein                                              |
| TERG_01578 | -2.65 | Pfs, NB-ARC and Ankyrin domain protein ( <i>T. verrucosum</i> )   |
| TERG_02208 | -2.69 | hypothetical protein                                              |
| TERG_04183 | -2.69 | yqcI protein ( <i>T. equinum</i> )                                |
| TERG_08709 | -2.72 | SesA protein ( <i>T. equinum</i> )                                |
| TERG_04107 | -2.74 | FunK1 protein kinase ( <i>M. canis</i> )                          |
| TERG_04228 | -2.76 | hypothetical protein                                              |
| TERG_08961 | -2.76 | hypothetical protein                                              |
| TERG_07282 | -2.77 | cytochrome P450 monooxygenase, putative ( <i>T. verrucosum</i> )  |
| TERG_05906 | -2.79 | serine/threonine protein kinase                                   |
| TERG_04959 | -2.85 | hypothetical protein                                              |
| TERG_03070 | -2.93 | flotillin domain-containing protein ( <i>T. equinum</i> )         |
| TERG_07234 | -2.96 | hypothetical protein                                              |
| TERG_08121 | -3.19 | protein kinase subdomain-containing protein ( <i>M. gypseum</i> ) |
| TERG_03304 | -3.33 | AAA family ATPase, putative ( <i>T. verrucosum</i> )              |
| TERG_04610 | -3.43 | hypothetical protein                                              |
| TERG_07486 | -3.45 | hypothetical protein                                              |
| TERG_02650 | -3.54 | NmrA family protein ( <i>T. equinum</i> )                         |
| TERG_02449 | -3.55 | phosphoadenosine phosphosulfate reductase                         |
| TERG_03251 | -3.64 | hypothetical protein                                              |
| TERG_01956 | -3.76 | C2H2 finger domain protein, putative ( <i>A. benhamiae</i> )      |
| TERG_07042 | -4.17 | viral protein TPX ( <i>M. canis</i> )                             |
| TERG_01853 | -4.29 | hypothetical protein                                              |
| TERG_03252 | -4.30 | hypothetical protein                                              |

Gene expression values are expressed in log<sub>2</sub> fold change.

| ID         | 24 hours | 48 hours | 96 hours | Gene Product Name                                             |
|------------|----------|----------|----------|---------------------------------------------------------------|
| TERG_00598 | 5.25     | 4.93     |          | hypothetical protein                                          |
| TERG_04115 | 4.92     | 5.55     |          | aldo-keto reductase, putative ( <i>T. verrucosum</i> )        |
| TERG_07166 | 4.50     | 3.79     |          | hypothetical protein                                          |
| TERG_08358 | 4.23     | 8.43     |          | dimethylallyl tryptophan synthase GliD1 ( <i>T. equinum</i> ) |
| TERG_02820 | 4.15     | 2.76     |          | polyketide synthase ( <i>T. tonsurans</i> )                   |
| TERG_08700 | 4.07     | 2.69     |          | DUF895 domain membrane protein ( <i>T. equinum</i> )          |
| TERG_06839 | 3.89     | 3.30     |          | extracellular proline-rich protein ( <i>T. verrucosum</i> )   |
| TERG_01192 | 3.76     | 3.58     |          | hypothetical protein                                          |
| TERG_06673 | 3.58     | 3.49     |          | pachytene checkpoint component Pch2 ( <i>T. tonsurans</i> )   |
| TERG_05259 | 3.31     | 1.80     |          | cytochrome P450, putative ( <i>A. benhamiae</i> )             |
| TERG_02511 | 3.18     | 2.70     |          | salicylate hydroxylase, putative ( <i>A. benhamiae</i> )      |
| TERG_07466 | 3.13     | 3.79     |          | hypothetical protein                                          |
| TERG_11582 | 3.09     | 3.52     |          | hypothetical protein                                          |



|            |      |      |                                                                               |
|------------|------|------|-------------------------------------------------------------------------------|
| TERG_08359 | 3.08 | 2.63 | FAD-dependent monooxygenase ( <i>T. tonsurans</i> )                           |
| TERG_12532 | 2.92 | 1.71 | hypothetical protein                                                          |
| TERG_01053 | 2.88 | 2.88 | MFS monocarboxylate transporter, putative ( <i>T. verrucosum</i> )            |
| TERG_05260 | 2.84 | 1.89 | general amidase GmdB ( <i>A. benhamiae</i> )                                  |
| TERG_11866 | 2.80 | 2.30 | hypothetical protein                                                          |
| TERG_11905 | 2.78 | 3.46 | hypothetical protein                                                          |
| TERG_04732 | 2.75 | 2.48 | hypothetical protein                                                          |
| TERG_08002 | 2.69 | 2.42 | hypothetical protein                                                          |
| TERG_11660 | 2.64 | 2.22 | mitochondrial 40S ribosomal protein ( <i>T. tonsurans</i> )                   |
| TERG_07295 | 2.61 | 3.05 | C6 finger domain protein, putative ( <i>T. verrucosum</i> )                   |
| TERG_01443 | 2.57 | 2.67 | ABC multidrug transporter ( <i>T. tonsurans</i> )                             |
| TERG_05317 | 2.56 | 3.10 | lipase, putative ( <i>T. verrucosum</i> )                                     |
| TERG_05442 | 2.49 | 2.96 | hypothetical protein                                                          |
| TERG_11940 | 2.46 | 2.84 | hypothetical protein                                                          |
| TERG_04461 | 2.39 | 1.52 | P-type ATPase ( <i>T. equinum</i> )                                           |
| TERG_12222 | 2.38 | 3.01 | polyketide synthase ( <i>T. equinum</i> )                                     |
| TERG_06933 | 2.37 | 2.19 | hypothetical protein                                                          |
| TERG_06105 | 2.36 | 2.85 | hypothetical protein                                                          |
| TERG_03916 | 2.35 | 1.82 | geranylgeranyl pyrophosphate synthetase ( <i>T. tonsurans</i> )               |
| TERG_02307 | 2.35 | 1.63 | mitotic spindle checkpoint protein (Mad2B), putative ( <i>T. verrucosum</i> ) |
| TERG_12306 | 2.31 | 1.66 | autophagy protein ( <i>T. tonsurans</i> )                                     |
| TERG_03956 | 2.29 | 2.15 | hypothetical protein                                                          |
| TERG_07959 | 2.23 | 1.94 | GPI-anchored cell wall beta-1,3-endoglucanase EglC ( <i>A. benhamiae</i> )    |
| TERG_11881 | 2.21 | 1.80 | G-patch domain-containing protein ( <i>T. equinum</i> )                       |
| TERG_01444 | 2.21 | 1.69 | nonribosomal peptide synthase Pes1 ( <i>A. benhamiae</i> )                    |
| TERG_08614 | 2.20 | 3.65 | hypothetical protein                                                          |
| TERG_03054 | 2.20 | 2.66 | glycosyl hydrolase ( <i>T. tonsurans</i> )                                    |
| TERG_00914 | 2.17 | 2.58 | hypothetical protein                                                          |
| TERG_03815 | 2.17 | 2.39 | subtilisin-like protease 3                                                    |
| TERG_02118 | 2.15 | 2.48 | GPI anchored protein, putative ( <i>A. benhamiae</i> )                        |
| TERG_02469 | 2.15 | 1.68 | hypothetical protein                                                          |
| TERG_03248 | 2.14 | 1.75 | extracellular metalloproteinase 3                                             |
| TERG_11655 | 2.13 | 3.24 | hypothetical protein                                                          |
| TERG_11949 | 2.13 | 2.45 | hypothetical protein                                                          |
| TERG_03614 | 2.12 | 1.57 | hypothetical protein                                                          |
| TERG_02512 | 2.11 | 2.90 | hypothetical protein                                                          |
| TERG_03706 | 2.10 | 1.97 | trichodiene oxygenase ( <i>T. equinum</i> )                                   |
| TERG_00702 | 2.09 | 1.82 | hypothetical protein                                                          |
| TERG_08208 | 2.09 | 1.55 | glutathione S-transferase ( <i>T. verrucosum</i> )                            |
| TERG_08913 | 2.09 | 1.69 | cytochrome P450 ( <i>T. equinum</i> )                                         |
| TERG_03702 | 2.08 | 1.98 | hypothetical protein                                                          |
| TERG_01092 | 2.07 | 2.92 | leucine rich repeat protein ( <i>T. equinum</i> )                             |
| TERG_11757 | 2.06 | 2.70 | hypothetical protein                                                          |

|            |      |      |                                                                         |
|------------|------|------|-------------------------------------------------------------------------|
| TERG_00520 | 2.06 | 2.57 | hypothetical protein                                                    |
| TERG_04164 | 2.05 | 1.51 | hypothetical protein                                                    |
| TERG_11832 | 2.03 | 2.35 | cytosolic Fe-S cluster assembling factor NBP35 ( <i>T. tonsurans</i> )  |
| TERG_07761 | 1.99 | 2.23 | hypothetical protein                                                    |
| TERG_08354 | 1.98 | 1.68 | hypothetical protein                                                    |
| TERG_08115 | 1.97 | 3.67 | hypothetical protein                                                    |
| TERG_11802 | 1.97 | 2.43 | mucin ( <i>M. canis</i> )                                               |
| TERG_00828 | 1.97 | 2.55 | hypothetical protein                                                    |
| TERG_00710 | 1.96 | 1.61 | hypothetical protein                                                    |
| TERG_12540 | 1.95 | 1.95 | hypothetical protein                                                    |
| TERG_00072 | 1.95 | 1.77 | hypothetical protein                                                    |
| TERG_03893 | 1.95 | 2.70 | C6 transcription factor, putative ( <i>A. benhamiae</i> )               |
| TERG_06106 | 1.94 | 1.83 | sulfate permease 2 ( <i>T. tonsurans</i> )                              |
| TERG_12368 | 1.94 | 2.21 | hypothetical protein                                                    |
| TERG_02092 | 1.94 | 1.95 | hypothetical protein                                                    |
| TERG_01223 | 1.93 | 3.48 | F-box domain protein ( <i>T. verrucosum</i> )                           |
| TERG_01923 | 1.91 | 2.14 | hypothetical protein                                                    |
| TERG_03886 | 1.91 | 2.57 | proline permease, putative ( <i>T. verrucosum</i> )                     |
| TERG_02661 | 1.90 | 2.07 | hypothetical protein                                                    |
| TERG_07399 | 1.89 | 1.94 | fibronectin type III domain-containing protein ( <i>M. gypseum</i> )    |
| TERG_08135 | 1.88 | 1.84 | GTP-binding protein GTR2 ( <i>M. gypseum</i> )                          |
| TERG_06377 | 1.88 | 2.38 | metalloproteinase, putative ( <i>A. benhamiae</i> )                     |
| TERG_02405 | 1.87 | 1.55 | mating locus protein, putative ( <i>T. verrucosum</i> )                 |
| TERG_06512 | 1.87 | 3.22 | hypothetical protein                                                    |
| TERG_04956 | 1.86 | 1.92 | hypothetical protein                                                    |
| TERG_06073 | 1.82 | 1.75 | MFS monocarboxylate transporter ( <i>T. equinum</i> )                   |
| TERG_08114 | 1.76 | 3.03 | anaphase-promoting complex component Cut20/Apc4 ( <i>T. tonsurans</i> ) |
| TERG_01768 | 1.76 | 1.81 | hypothetical protein                                                    |
| TERG_02487 | 1.75 | 1.59 | NADPH oxidase isoform 2 ( <i>T. equinum</i> )                           |
| TERG_06691 | 1.71 | 1.61 | hypothetical protein                                                    |
| TERG_08334 | 1.70 | 2.19 | proline oxidase Put1, putative ( <i>A. benhamiae</i> )                  |
| TERG_04187 | 1.70 | 1.52 | hypothetical protein                                                    |
| TERG_11694 | 1.69 | 2.08 | hypothetical protein                                                    |
| TERG_08049 | 1.69 | 1.52 | cation diffusion facilitator, putative ( <i>T. verrucosum</i> )         |
| TERG_03705 | 1.68 | 2.16 | cytochrome P450 monooxygenase, putative ( <i>A. benhamiae</i> )         |
| TERG_03554 | 1.68 | 1.78 | hypothetical protein                                                    |
| TERG_03024 | 1.67 | 2.26 | hypothetical protein                                                    |
| TERG_01609 | 1.66 | 1.62 | Na/K ATPase alpha 1 subunit ( <i>T. equinum</i> )                       |
| TERG_03052 | 1.65 | 2.41 | glycosyl hydrolase ( <i>T. tonsurans</i> )                              |
| TERG_12603 | 1.64 | 1.99 | hypothetical protein                                                    |
| TERG_05117 | 1.61 | 1.82 | transcription factor TFIIH subunit Tfb4 ( <i>T. tonsurans</i> )         |
| TERG_06565 | 1.60 | 1.55 | protein kinase subdomain-containing protein ( <i>T. equinum</i> )       |
| TERG_03949 | 1.55 | 1.96 | equisetin synthetase ( <i>T. equinum</i> )                              |

|            |       |       |                                                                         |
|------------|-------|-------|-------------------------------------------------------------------------|
| TERG_02422 | 1.53  | 2.03  | rho GTPase activator ( <i>T. equinum</i> )                              |
| TERG_03846 | 1.52  | 1.67  | F-box domain-containing protein ( <i>T. equinum</i> )                   |
| TERG_05130 | 1.51  | 1.85  | thioredoxin reductase GliT ( <i>A. benhamiae</i> )                      |
| TERG_01510 | 1.51  | 2.16  | proline-specific permease ( <i>T. tonsurans</i> )                       |
| TERG_07552 | 1.51  | 1.57  | hypothetical protein                                                    |
| TERG_00831 | -1.53 | -2.04 | gamma-glutamyltransferase                                               |
| TERG_01843 | -1.58 | -1.99 | inositol-3-phosphate synthase ( <i>T. tonsurans</i> )                   |
| TERG_00956 | -1.59 | -3.10 | extracellular thaumatin domain-containing protein ( <i>T. equinum</i> ) |
| TERG_04666 | -1.63 | -1.94 | hypothetical protein                                                    |
| TERG_03352 | -1.64 | -1.73 | tyrosine decarboxylase ( <i>T. equinum</i> )                            |
| TERG_07923 | -1.66 | -1.75 | neutral amino acid permease ( <i>T. equinum</i> )                       |
| TERG_02454 | -1.67 | -1.79 | deoxyribose-phosphate aldolase                                          |
| TERG_07417 | -1.67 | -1.92 | hypothetical protein                                                    |
| TERG_00070 | -1.68 | -2.00 | maleylacetoacetate isomerase                                            |
| TERG_12027 | -1.68 | -1.55 | hypothetical protein                                                    |
| TERG_01518 | -1.69 | -1.67 | hypothetical protein                                                    |
| TERG_01190 | -1.71 | -1.74 | RNA binding protein ( <i>T. equinum</i> )                               |
| TERG_06975 | -1.72 | -1.92 | S-formylglutathione hydrolase                                           |
| TERG_12397 | -1.73 | -1.61 | hypothetical protein                                                    |
| TERG_07751 | -1.74 | -1.82 | serine/threonine protein kinase ( <i>T. equinum</i> )                   |
| TERG_12681 | -1.74 | -1.84 | alpha-mannosidase ( <i>T. tonsurans</i> )                               |
| TERG_05201 | -1.76 | -1.80 | integral membrane protein ( <i>T. equinum</i> )                         |
| TERG_01138 | -1.77 | -2.30 | monocarboxylate transporter 4 ( <i>M. gypseum</i> )                     |
| TERG_01383 | -1.78 | -1.96 | dienelactone hydrolase ( <i>T. tonsurans</i> )                          |
| TERG_04680 | -1.81 | -1.65 | hypothetical protein                                                    |
| TERG_07927 | -1.81 | -2.16 | hypothetical protein                                                    |
| TERG_11786 | -1.82 | -2.27 | oligosaccharyl transferase stt3 subunit ( <i>T. equinum</i> )           |
| TERG_06651 | -1.82 | -1.62 | cytochrome P450, putative ( <i>T. verrucosum</i> )                      |
| TERG_11564 | -1.83 | -1.87 | beta-lactamase ( <i>T. equinum</i> )                                    |
| TERG_08787 | -1.84 | -2.72 | aminotransferase ( <i>T. tonsurans</i> )                                |
| TERG_00342 | -1.84 | -1.75 | phosphoglucomutase                                                      |
| TERG_04715 | -1.85 | -1.96 | hypothetical protein                                                    |
| TERG_04021 | -1.86 | -2.08 | GNAT family acetyltransferase, putative ( <i>A. benhamiae</i> )         |
| TERG_03291 | -1.88 | -1.67 | SNF2 family helicase, putative ( <i>T. verrucosum</i> )                 |
| TERG_00878 | -1.92 | -2.43 | hypothetical protein                                                    |
| TERG_04721 | -1.92 | -1.92 | glutamate carboxypeptidase ( <i>T. equinum</i> )                        |
| TERG_11942 | -1.98 | -1.58 | MFS maltose permease ( <i>T. tonsurans</i> )                            |
| TERG_00385 | -1.99 | -2.58 | oxidoreductase ( <i>T. equinum</i> )                                    |
| TERG_07777 | -2.00 | -2.62 | O-acetylhomoserine (thiol)-lyase                                        |
| TERG_00510 | -2.01 | -1.66 | hypothetical protein                                                    |
| TERG_06466 | -2.01 | -1.90 | hypothetical protein                                                    |
| TERG_03367 | -2.03 | -1.98 | hypothetical protein                                                    |
| TERG_02001 | -2.03 | -2.74 | oligopeptidase ( <i>T. tonsurans</i> )                                  |
| TERG_03174 | -2.04 | -2.12 | MFS siderochrome iron transporter MirB ( <i>T. verrucosum</i> )         |

## Supplementary Material

|            |       |       |                                                                                    |
|------------|-------|-------|------------------------------------------------------------------------------------|
| TERG_02493 | -2.12 | -1.93 | glyoxalase family protein ( <i>T. verrucosum</i> )                                 |
| TERG_02545 | -2.13 | -1.95 | MFS monocarboxylate transporter ( <i>T. equinum</i> )                              |
| TERG_08757 | -2.14 | -3.34 | hypothetical protein                                                               |
| TERG_02649 | -2.19 | -2.83 | benzoate 4-monooxygenase cytochrome P450 ( <i>T. equinum</i> )                     |
| TERG_02960 | -2.23 | -2.61 | Beta-ketoacyl synthase ( <i>T. tonsurans</i> )                                     |
| TERG_11593 | -2.24 | -2.04 | carboxypeptidase Y, putative ( <i>A. benhamiae</i> )                               |
| TERG_06208 | -2.27 | -2.00 | DUF636 domain-containing protein ( <i>M. gypseum</i> )                             |
| TERG_00151 | -2.30 | -2.02 | hypothetical protein                                                               |
| TERG_00995 | -2.30 | -1.76 | hypothetical protein                                                               |
| TERG_00807 | -2.32 | -1.75 | hypothetical protein                                                               |
| TERG_04227 | -2.33 | -2.26 | ABC transporter ( <i>T. tonsurans</i> )                                            |
| TERG_07898 | -2.43 | -1.79 | lanthionine synthetase C family protein, putative ( <i>T. verrucosum</i> )         |
| TERG_05771 | -2.43 | -2.09 | hypothetical protein                                                               |
| TERG_05095 | -2.46 | -1.80 | quinone oxidoreductase ( <i>T. tonsurans</i> )                                     |
| TERG_02725 | -2.57 | -2.61 | hypothetical protein                                                               |
| TERG_00499 | -2.58 | -1.97 | hypothetical protein                                                               |
| TERG_01886 | -2.62 | -2.33 | hypothetical protein                                                               |
| TERG_04378 | -2.67 | -2.83 | aldehyde reductase I (ARI), putative ( <i>T. verrucosum</i> )                      |
| TERG_05032 | -2.77 | -2.20 | C6 transcription factor ( <i>T. equinum</i> )                                      |
| TERG_00911 | -2.86 | -2.85 | hypothetical protein                                                               |
| TERG_04639 | -2.89 | -3.17 | hypothetical protein                                                               |
| TERG_04879 | -3.08 | -1.53 | hypothetical protein                                                               |
| TERG_03299 | -3.30 | -1.58 | pyridoxal-dependent decarboxylase ( <i>T. equinum</i> )                            |
| TERG_05299 | -3.32 | -2.75 | glutathione S-transferase, putative ( <i>A. benhamiae</i> )                        |
| TERG_02961 | -3.46 | -3.50 | MFS transporter ( <i>T. equinum</i> )                                              |
| TERG_04250 | -3.75 | -2.41 | enoyl-CoA hydratase/isomerase family protein ( <i>A. benhamiae</i> )               |
| TERG_08054 | -3.90 | -3.46 | homoserine acetyltransferase ( <i>T. tonsurans</i> )                               |
| TERG_00026 | -4.09 | -2.95 | flavin-binding monooxygenase, putative ( <i>T. verrucosum</i> )                    |
| TERG_03699 | -4.17 | -2.91 | hypothetical protein                                                               |
| TERG_04310 | -4.23 | -2.89 | alcohol dehydrogenase ( <i>T. tonsurans</i> )                                      |
| TERG_07133 | -4.25 | -3.79 | hypothetical protein                                                               |
| TERG_06052 | -4.31 | -3.26 | oxidoreductase, short-chain dehydrogenase/reductase family ( <i>A. benhamiae</i> ) |
| TERG_07326 | -4.77 | -2.43 | glutathione S-transferase PARB ( <i>T. equinum</i> )                               |
| TERG_03008 | -5.19 | -2.46 | zinc-containing alcohol dehydrogenase, putative ( <i>A. benhamiae</i> )            |
| TERG_06051 | -5.77 | -6.03 | 4-dimethylallyltryptophan methyltransferase ( <i>T. tonsurans</i> )                |
| TERG_04738 | -8.64 | -4.98 | hypothetical protein                                                               |

Gene expression values are expressed in log<sub>2</sub> fold change.

| ID         | 24 hours | 48 hours | 96 hours | Gene Product Name                               |
|------------|----------|----------|----------|-------------------------------------------------|
| TERG_07456 | 3.21     |          | 2.31     | cell wall protein PhiA ( <i>T. equinum</i> )    |
| TERG_05733 | 3.02     |          | -6.75    | salivary glue protein Sgs-3 ( <i>M. canis</i> ) |

|            |       |       |                                                                         |
|------------|-------|-------|-------------------------------------------------------------------------|
| TERG_05965 | 2.88  | 3.56  | hypothetical protein                                                    |
| TERG_05323 | 2.39  | 2.24  | hypothetical protein                                                    |
| TERG_01178 | 2.12  | 2.04  | hypothetical protein                                                    |
| TERG_04156 | 2.11  | 2.90  | hypothetical protein                                                    |
| TERG_03647 | 2.08  | 1.92  | hypothetical protein                                                    |
| TERG_04547 | 2.03  | 2.05  | aquaporin ( <i>T. tonsurans</i> )                                       |
| TERG_11709 | 1.83  | 2.36  | hypothetical protein                                                    |
| TERG_12061 | 1.74  | 2.14  | cytochrome P450 monooxygenase ( <i>T. equinum</i> )                     |
| TERG_02583 | 1.56  | -3.24 | phosphate permease ( <i>A. benhamiae</i> )                              |
| TERG_02447 | -1.59 | -2.55 | sulfate adenylyltransferase                                             |
| TERG_04508 | -1.62 | -2.04 | AAA ATPase ( <i>T. equinum</i> )                                        |
| TERG_11844 | -1.67 | -1.62 | RNA polymerase II mediator complex component Srb8 ( <i>T. equinum</i> ) |
| TERG_00388 | -1.68 | -1.85 | DnaJ domain-containing protein ( <i>T. equinum</i> )                    |
| TERG_03254 | -1.78 | -2.70 | hypothetical protein                                                    |
| TERG_04130 | -1.81 | -2.21 | plasma membrane ATPase                                                  |
| TERG_08436 | -1.81 | -1.78 | hypothetical protein                                                    |
| TERG_08708 | -1.87 | -2.52 | SesA protein ( <i>T. equinum</i> )                                      |
| TERG_02209 | -1.94 | -2.12 | deoxyribodipyrimidine photo-lyase ( <i>T. tonsurans</i> )               |
| TERG_01685 | -2.00 | -2.92 | glutathione S-transferase, putative ( <i>A. benhamiae</i> )             |
| TERG_05035 | -2.08 | -1.72 | pentatricopeptide repeat protein ( <i>T. tonsurans</i> )                |
| TERG_07504 | -5.49 | -6.15 | sialidase ( <i>T. tonsurans</i> )                                       |

Gene expression values are expressed in log<sub>2</sub> fold change.

| ID         | 24 hours | 48 hours | 96 hours | Gene Product Name                                                         |
|------------|----------|----------|----------|---------------------------------------------------------------------------|
| TERG_12391 |          | 4.19     | 4.94     | hypothetical protein                                                      |
| TERG_00060 |          | 3.63     | 3.30     | GPI anchored cell wall protein, putative ( <i>A. benhamiae</i> )          |
| TERG_05523 |          | 3.29     | 2.15     | hypothetical protein                                                      |
| TERG_04511 |          | 3.10     | 1.70     | hypothetical protein                                                      |
| TERG_00221 |          | 3.07     | 2.58     | hypothetical protein                                                      |
| TERG_11516 |          | 2.65     | 2.32     | hypothetical protein                                                      |
| TERG_06116 |          | 2.31     | 1.77     | indoleamine 2,3-dioxygenase ( <i>T. equinum</i> )                         |
| TERG_01405 |          | 2.25     | 2.30     | glutathione S-transferase ( <i>T. equinum</i> )                           |
| TERG_12064 |          | 2.25     | 1.99     | hypothetical protein                                                      |
| TERG_12028 |          | 2.24     | 2.11     | metallothionein family protein ( <i>T. equinum</i> )                      |
| TERG_01841 |          | 2.21     | 2.57     | hypothetical protein                                                      |
| TERG_11915 |          | 2.20     | 2.12     | nucleolus protein required for cell viability ( <i>T. tonsurans</i> )     |
| TERG_04504 |          | 2.19     | -2.01    | extracellular protein ( <i>T. equinum</i> )                               |
| TERG_04032 |          | 2.17     | 1.51     | DNA repair and transcription factor Ada, putative ( <i>A. benhamiae</i> ) |
| TERG_01840 |          | 2.15     | 3.01     | carboxypeptidase S1 ( <i>T. equinum</i> )                                 |
| TERG_12158 |          | 1.98     | 1.74     | hypothetical protein                                                      |
| TERG_06035 |          | 1.92     | 4.44     | hypothetical protein                                                      |
| TERG_12141 |          | 1.88     | 1.92     | Extracellular lipase ( <i>T. tonsurans</i> )                              |

## Supplementary Material

|            |       |       |                                                                                       |
|------------|-------|-------|---------------------------------------------------------------------------------------|
| TERG_06080 | 1.82  | 2.00  | serine/threonine protein kinase                                                       |
| TERG_12664 | 1.81  | 1.94  | adenosine deaminase ( <i>T. tonsurans</i> )                                           |
| TERG_04778 | 1.80  | 2.06  | ribosome assembly and transport protein Srp40, putative ( <i>T. verrucosum</i> )      |
| TERG_12097 | 1.76  | 2.00  | cytochrome P450 monooxygenase, putative ( <i>A. benhamiae</i> )                       |
| TERG_00471 | 1.73  | -1.89 | hypothetical protein                                                                  |
| TERG_01757 | 1.71  | 2.68  | DNA repair protein RAD16 ( <i>T. equinum</i> )                                        |
| TERG_08145 | 1.66  | 2.12  | ADP-ribose 1"-phosphate phosphatase ( <i>T. equinum</i> )                             |
| TERG_12327 | 1.63  | 2.37  | alkaline serine protease (PR1)/allergen F18, putative ( <i>T. verrucosum</i> )        |
| TERG_05195 | 1.62  | 2.83  | radical SAM domain-containing protein ( <i>T. tonsurans</i> )                         |
| TERG_07053 | 1.61  | 1.59  | hypothetical protein                                                                  |
| TERG_03473 | 1.57  | -1.59 | hypothetical protein                                                                  |
| TERG_04924 | 1.56  | 2.27  | threonine aldolase, putative ( <i>T. verrucosum</i> )                                 |
| TERG_12085 | 1.56  | -2.01 | hypothetical protein                                                                  |
| TERG_06859 | 1.51  | 1.70  | exosome complex endonuclease 1/ribosomal RNA processing protein ( <i>T. equinum</i> ) |
| TERG_06995 | -1.52 | -2.71 | metalloreductase, putative ( <i>T. verrucosum</i> )                                   |
| TERG_03116 | -1.52 | -1.54 | zf-PARP-type zinc finger protein ( <i>T. tonsurans</i> )                              |
| TERG_07904 | -1.53 | -1.71 | tubulin beta chain                                                                    |
| TERG_00615 | -1.53 | -1.82 | HLH transcription factor, putative ( <i>A. benhamiae</i> )                            |
| TERG_04937 | -1.54 | -1.57 | alpha/beta hydrolase ( <i>T. equinum</i> )                                            |
| TERG_11640 | -1.55 | -2.61 | hypothetical protein                                                                  |
| TERG_07905 | -1.57 | -1.73 | 1-pyrroline-5-carboxylate dehydrogenase                                               |
| TERG_06177 | -1.60 | -1.91 | mitochondrial carrier protein, putative ( <i>T. verrucosum</i> )                      |
| TERG_01925 | -1.60 | -2.02 | hypothetical protein                                                                  |
| TERG_07785 | -1.61 | -1.56 | SNARE domain-containing protein ( <i>T. tonsurans</i> )                               |
| TERG_02353 | -1.62 | -3.51 | UbiD family decarboxylase, putative ( <i>T. verrucosum</i> )                          |
| TERG_01904 | -1.63 | -1.62 | hypothetical protein                                                                  |
| TERG_06438 | -1.64 | -1.87 | malate dehydrogenase, NAD-dependent                                                   |
| TERG_05651 | -1.64 | -1.78 | hypothetical protein                                                                  |
| TERG_03183 | -1.66 | -2.26 | hypothetical protein                                                                  |
| TERG_06207 | -1.67 | -1.59 | proline oxidase PrnD ( <i>T. verrucosum</i> )                                         |
| TERG_05516 | -1.68 | -2.16 | RNA interference and gene silencing protein (Qde2), putative ( <i>T. verrucosum</i> ) |
| TERG_03033 | -1.68 | -2.03 | BTB domain and ankyrin repeat protein ( <i>A. benhamiae</i> )                         |
| TERG_08560 | -1.70 | -1.55 | hypothetical protein                                                                  |
| TERG_08459 | -1.71 | -2.19 | cell wall glucanase, putative ( <i>T. verrucosum</i> )                                |
| TERG_02489 | -1.72 | -1.70 | sister chromatid cohesion acetyltransferase Eco1, putative ( <i>A. benhamiae</i> )    |
| TERG_11815 | -1.74 | -2.30 | OPT family small oligopeptide transporter                                             |
| TERG_11835 | -1.74 | -1.53 | choline transporter Hnm1, putative ( <i>T. verrucosum</i> )                           |
| TERG_05793 | -1.75 | -1.63 | hypothetical protein                                                                  |
| TERG_01733 | -1.75 | -1.59 | alcohol dehydrogenase, putative ( <i>T. verrucosum</i> )                              |
| TERG_05616 | -1.77 | -2.03 | hypothetical protein                                                                  |
| TERG_07260 | -1.80 | -2.15 | hypothetical protein                                                                  |

|            |       |       |                                                                                    |
|------------|-------|-------|------------------------------------------------------------------------------------|
| TERG_00724 | -1.90 | -2.54 | C6 finger domain protein, putative ( <i>T. verrucosum</i> )                        |
| TERG_01848 | -1.91 | -2.92 | integral membrane protein ( <i>M. gypseum</i> )                                    |
| TERG_01336 | -1.91 | -2.15 | MFS transporter ( <i>T. equinum</i> )                                              |
| TERG_05518 | -1.92 | -2.72 | oxidoreductase, short chain dehydrogenase/reductase family ( <i>A. benhamiae</i> ) |
| TERG_06666 | -1.92 | -1.78 | prolyl aminopeptidase                                                              |
| TERG_06607 | -1.92 | -2.20 | serine-rich protein, putative ( <i>T. verrucosum</i> )                             |
| TERG_07580 | -1.95 | -1.57 | hypothetical protein                                                               |
| TERG_03728 | -1.99 | -3.16 | hypothetical protein                                                               |
| TERG_03929 | -1.99 | -3.18 | hypothetical protein                                                               |
| TERG_05615 | -2.00 | -5.55 | hsp70-like protein ( <i>T. equinum</i> )                                           |
| TERG_00951 | -2.01 | -3.84 | hypothetical protein                                                               |
| TERG_01901 | -2.10 | -2.99 | glycerol kinase                                                                    |
| TERG_04775 | -2.11 | -1.75 | beta-N-hexosaminidase, putative ( <i>A. benhamiae</i> )                            |
| TERG_01563 | -2.15 | -1.74 | hypothetical protein                                                               |
| TERG_04079 | -2.19 | -1.69 | 4-aminobutyrate aminotransferase                                                   |
| TERG_00731 | -2.21 | -3.21 | hypothetical protein                                                               |
| TERG_04867 | -2.28 | -3.57 | SAM and PH domain protein (Boi1), putative ( <i>A. benhamiae</i> )                 |
| TERG_02542 | -2.29 | -1.81 | integral membrane protein Pth11-like, putative ( <i>T. verrucosum</i> )            |
| TERG_06189 | -2.32 | -1.99 | endo-1,3(4)-beta-glucanase, putative ( <i>T. verrucosum</i> )                      |
| TERG_01281 | -2.33 | -2.12 | malate synthase, glyoxysomal                                                       |
| TERG_00958 | -2.38 | -1.59 | amino acid permease ( <i>T. tonsurans</i> )                                        |
| TERG_02798 | -2.41 | -2.26 | DUF895 domain membrane protein ( <i>T. equinum</i> )                               |
| TERG_07294 | -2.41 | -1.90 | glyoxylate reductase ( <i>T. tonsurans</i> )                                       |
| TERG_02845 | -2.43 | -1.85 | cercosporin toxin biosynthesis protein ( <i>T. equinum</i> )                       |
| TERG_05895 | -2.44 | -1.87 | MFS transporter ( <i>M. canis</i> )                                                |
| TERG_12498 | -2.44 | -2.10 | 2-deoxy-D-gluconate 3-dehydrogenase ( <i>T. equinum</i> )                          |
| TERG_08712 | -2.48 | -2.51 | betaine lipid synthase ( <i>T. tonsurans</i> )                                     |
| TERG_00481 | -2.60 | -2.57 | beta-glucosidase, putative ( <i>T. verrucosum</i> )                                |
| TERG_05287 | -2.61 | -2.31 | glycerate-and formate-dehydrogenase ( <i>T. equinum</i> )                          |
| TERG_07783 | -2.70 | -3.35 | MFS peptide transporter, putative ( <i>T. verrucosum</i> )                         |
| TERG_03072 | -2.73 | -1.51 | F-box domain-containing protein ( <i>T. equinum</i> )                              |
| TERG_02538 | -2.83 | -1.64 | carboxylesterase ( <i>T. equinum</i> )                                             |
| TERG_02528 | -2.89 | -2.53 | ubiE/COQ5 methyltransferase, putative ( <i>T. verrucosum</i> )                     |
| TERG_02380 | -4.05 | -5.78 | hypothetical protein                                                               |

Gene expression values are expressed in log<sub>2</sub> fold change.

| ID         | 24 hours | 48 hours | 96 hours | Gene Product Name                                                |
|------------|----------|----------|----------|------------------------------------------------------------------|
| TERG_07028 | 6.46     | 7.07     | 6.69     | hypothetical protein                                             |
| TERG_01004 | 4.30     | 3.66     | 3.11     | extracellular sialidase/neuraminidase ( <i>T. equinum</i> )      |
| TERG_12090 | 4.06     | 2.83     | 3.73     | hypothetical protein                                             |
| TERG_08360 | 3.93     | 3.45     | 2.02     | metallo-beta-lactamase superfamily protein ( <i>T. equinum</i> ) |
| TERG_00161 | 3.58     | 4.56     | 3.41     | hypothetical protein                                             |

|            |       |       |       |                                                                                        |
|------------|-------|-------|-------|----------------------------------------------------------------------------------------|
| TERG_03827 | 3.43  | 1.87  | 2.16  | hypothetical protein                                                                   |
| TERG_03826 | 3.42  | 2.14  | 2.13  | hypothetical protein                                                                   |
| TERG_06601 | 3.26  | 4.39  | 3.65  | flavin-containing amine oxidasedehydrogenase ( <i>T. equinum</i> )                     |
| TERG_07847 | 2.62  | 1.89  | 1.87  | hypothetical protein                                                                   |
| TERG_04569 | 2.42  | 2.21  | 1.95  | cytosolic Fe-S cluster assembling factor cfd1 ( <i>T. equinum</i> )                    |
| TERG_08077 | 2.32  | 1.62  | 1.99  | hypothetical protein                                                                   |
| TERG_11517 | 2.25  | 3.17  | 1.95  | hypothetical protein                                                                   |
| TERG_06076 | 2.23  | 2.42  | 2.73  | hypothetical protein                                                                   |
| TERG_03620 | 2.18  | 2.15  | 2.82  | glycosyl transferase ( <i>T. tonsurans</i> )                                           |
| TERG_07364 | 2.00  | 2.20  | 2.32  | oxidoreductase, zinc-binding dehydrogenase family superfamily ( <i>T. verrucosum</i> ) |
| TERG_05374 | 1.97  | 1.59  | 1.66  | hypothetical protein                                                                   |
| TERG_00371 | 1.79  | 2.86  | 1.51  | ferric-chelate reductase ( <i>T. tonsurans</i> )                                       |
| TERG_12320 | 1.78  | 1.50  | 1.91  | hypothetical protein                                                                   |
| TERG_08149 | 1.71  | 1.78  | 1.51  | hypothetical protein                                                                   |
| TERG_00119 | 1.70  | 2.00  | 1.61  | CAMK/CAMKL/GIN4 protein kinase                                                         |
| TERG_00709 | 1.69  | 1.88  | 2.17  | MOSC domain-containing protein ( <i>T. equinum</i> )                                   |
| TERG_00713 | 1.60  | 1.77  | 2.16  | hypothetical protein                                                                   |
| TERG_00879 | -1.57 | -2.23 | -2.82 | hypothetical protein                                                                   |
| TERG_03353 | -1.58 | -2.95 | -4.06 | endoglucanase ( <i>T. equinum</i> )                                                    |
| TERG_07135 | -1.58 | -1.75 | -1.67 | hypothetical protein                                                                   |
| TERG_05659 | -1.58 | -2.67 | -3.48 | hypothetical protein                                                                   |
| TERG_01269 | -1.58 | -1.69 | -1.56 | 2-methylcitrate dehydratase                                                            |
| TERG_03182 | -1.58 | -1.53 | -2.03 | serine/threonine protein kinase ( <i>T. equinum</i> )                                  |
| TERG_02210 | -1.59 | -2.62 | -2.34 | hypothetical protein                                                                   |
| TERG_00538 | -1.59 | -2.24 | -1.84 | oxidoreductase ( <i>T. tonsurans</i> )                                                 |
| TERG_00733 | -1.64 | -2.66 | -4.27 | hypothetical protein                                                                   |
| TERG_00953 | -1.65 | -1.86 | -2.22 | OefC protein ( <i>T. equinum</i> )                                                     |
| TERG_05540 | -1.67 | -1.83 | -3.10 | cytochrome P450 monooxygenase, putative ( <i>T. verrucosum</i> )                       |
| TERG_08178 | -1.69 | -3.22 | -2.19 | endoglucanase ( <i>T. equinum</i> )                                                    |
| TERG_03544 | -1.70 | -1.74 | -3.13 | CMGC/RCK/MAK protein kinase                                                            |
| TERG_05899 | -1.73 | -2.85 | -2.72 | ubiE/COQ5 methyltransferase, putative ( <i>A. benhamiae</i> )                          |
| TERG_06238 | -1.76 | -2.05 | -1.66 | dihydroxy-acid dehydratase                                                             |
| TERG_02702 | -1.76 | -2.42 | -2.13 | sphingoid long-chain base transporter RSB1 ( <i>T. equinum</i> )                       |
| TERG_02349 | -1.77 | -1.88 | -1.92 | hypothetical protein                                                                   |
| TERG_07131 | -1.81 | -1.98 | -1.71 | phosphotransmitter protein Ypd1 ( <i>T. equinum</i> )                                  |
| TERG_00819 | -1.83 | -2.93 | -2.90 | PE repeat family protein ( <i>T. verrucosum</i> )                                      |
| TERG_02809 | -1.85 | -2.50 | -2.39 | hypothetical protein                                                                   |
| TERG_03977 | -1.87 | -2.77 | -2.68 | hypothetical protein                                                                   |
| TERG_01579 | -1.88 | -2.41 | -3.69 | hypothetical protein                                                                   |
| TERG_07238 | -1.89 | -2.03 | -1.53 | zinc-binding oxidoreductase, putative ( <i>A. benhamiae</i> )                          |
| TERG_05780 | -1.90 | -2.01 | -1.76 | hypothetical protein                                                                   |
| TERG_02043 | -1.91 | -2.66 | -2.98 | cysteine desulfurase ( <i>T. equinum</i> )                                             |



|            |       |       |       |                                                                                       |
|------------|-------|-------|-------|---------------------------------------------------------------------------------------|
| TERG_07796 | -1.94 | -3.95 | -1.93 | oxidoreductase, short-chain dehydrogenase/reductase family ( <i>A. benhamiae</i> )    |
| TERG_00855 | -1.94 | -4.13 | -3.61 | aromatic amino acid aminotransferase, putative ( <i>A. benhamiae</i> )                |
| TERG_02587 | -1.95 | -3.37 | -2.24 | hypothetical protein                                                                  |
| TERG_05063 | -1.95 | -2.74 | -3.28 | extracellular serine-rich protein ( <i>T. verrucosum</i> )                            |
| TERG_04487 | -1.95 | -2.30 | -2.13 | hypothetical protein                                                                  |
| TERG_11981 | -1.97 | -1.95 | -1.98 | 3-ketosteroid dehydrogenase ( <i>T. tonsurans</i> )                                   |
| TERG_05632 | -1.97 | -2.91 | -2.51 | MFS transporter, putative ( <i>T. verrucosum</i> )                                    |
| TERG_05639 | -1.98 | -2.44 | -2.23 | hypothetical protein                                                                  |
| TERG_00135 | -2.00 | -2.38 | -1.96 | metalloreductase transmembrane component ( <i>T. equinum</i> )                        |
| TERG_01193 | -2.00 | -2.83 | -3.14 | PRO41 protein ( <i>T. equinum</i> )                                                   |
| TERG_02986 | -2.00 | -1.69 | -3.83 | hypothetical protein                                                                  |
| TERG_02368 | -2.02 | -2.53 | -1.98 | extracellular developmental signal biosynthesis protein FluG ( <i>A. benhamiae</i> )  |
| TERG_01489 | -2.03 | -2.17 | -3.34 | MFS transporter ( <i>T. tonsurans</i> )                                               |
| TERG_06801 | -2.03 | -1.80 | -2.83 | cyclic nucleotide-binding domain-containing protein ( <i>T. tonsurans</i> )           |
| TERG_02369 | -2.04 | -2.29 | -1.93 | MFS transporter ( <i>T. tonsurans</i> )                                               |
| TERG_00458 | -2.05 | -2.58 | -2.43 | catalytic/hydrolase ( <i>T. equinum</i> )                                             |
| TERG_07588 | -2.11 | -1.76 | -1.64 | 5-methyltetrahydropteroyltriglutamate-homocysteine S-methyltransferase                |
| TERG_03382 | -2.12 | -1.83 | -1.62 | ThiJ/PfpI family protein ( <i>A. benhamiae</i> )                                      |
| TERG_00854 | -2.13 | -2.66 | -1.89 | hypothetical protein                                                                  |
| TERG_02615 | -2.18 | -2.87 | -1.92 | oxidoreductase, 2OG-Fe(II) oxygenase family, putative ( <i>A. benhamiae</i> )         |
| TERG_07830 | -2.18 | -3.07 | -2.47 | hypothetical protein                                                                  |
| TERG_00875 | -2.19 | -1.79 | -1.90 | glutamate-cysteine ligase                                                             |
| TERG_12723 | -2.20 | -2.48 | -2.17 | nonribosomal peptide synthase GliP ( <i>A. benhamiae</i> )                            |
| TERG_08353 | -2.28 | -2.83 | -2.49 | cytochrome P450 55A3 ( <i>T. tonsurans</i> )                                          |
| TERG_02199 | -2.29 | -2.79 | -2.05 | glutamate carboxypeptidase ( <i>T. equinum</i> )                                      |
| TERG_02262 | -2.33 | -2.17 | -1.93 | NACHT and WD domain protein ( <i>T. verrucosum</i> )                                  |
| TERG_03221 | -2.34 | -2.52 | -1.97 | C6 transcription factor, putative ( <i>A. benhamiae</i> )                             |
| TERG_05808 | -2.42 | -2.66 | -2.37 | hypothetical protein                                                                  |
| TERG_01959 | -2.45 | -2.69 | -4.40 | RNA polymerase Rpb1 C-terminal repeat domain-containing protein ( <i>T. equinum</i> ) |
| TERG_08174 | -2.47 | -3.00 | -1.64 | hypothetical protein                                                                  |
| TERG_11563 | -2.53 | -2.36 | -1.63 | beta-lactamase ( <i>T. equinum</i> )                                                  |
| TERG_04022 | -2.59 | -2.63 | -2.20 | carboxypeptidase S1, putative ( <i>A. benhamiae</i> )                                 |
| TERG_04563 | -2.60 | -1.63 | -4.05 | phenol monooxygenase ( <i>T. tonsurans</i> )                                          |
| TERG_02263 | -2.67 | -2.71 | -1.95 | hypothetical protein                                                                  |
| TERG_02367 | -2.69 | -3.50 | -3.17 | hypothetical protein                                                                  |
| TERG_06854 | -2.76 | -4.90 | -3.33 | glutamine-serine-proline rich protein, putative ( <i>A. benhamiae</i> )               |
| TERG_08869 | -2.76 | -3.63 | -4.31 | hypothetical protein                                                                  |
| TERG_02197 | -2.77 | -3.10 | -2.96 | nitrilase, putative ( <i>T. verrucosum</i> )                                          |
| TERG_07039 | -2.79 | -2.54 | -2.62 | hypothetical protein                                                                  |
| TERG_12591 | -2.89 | -3.07 | -1.76 | peptidase S8 family protein ( <i>T. equinum</i> )                                     |
| TERG_03359 | -2.95 | -1.64 | -1.98 | hypothetical protein                                                                  |

## Supplementary Material

|            |       |       |       |                                                                       |
|------------|-------|-------|-------|-----------------------------------------------------------------------|
| TERG_04421 | -2.96 | -3.51 | -2.38 | hypothetical protein                                                  |
| TERG_01490 | -2.98 | -1.64 | -3.06 | LysR family regulatory protein ( <i>M. gypseum</i> )                  |
| TERG_11964 | -3.02 | -3.16 | -2.20 | C6 transcription factor, putative ( <i>T. verrucosum</i> )            |
| TERG_03160 | -3.05 | -3.11 | -1.73 | hypothetical protein                                                  |
| TERG_03148 | -3.08 | -4.38 | -3.23 | molybdenum cofactor sulfuryase ( <i>T. equinum</i> )                  |
| TERG_08868 | -3.09 | -3.67 | -4.73 | FKBP-type peptidyl-prolyl isomerase, putative ( <i>A. benhamiae</i> ) |
| TERG_03885 | -3.15 | -4.04 | -3.46 | hypothetical protein                                                  |
| TERG_04240 | -3.18 | -3.10 | -1.54 | cupin 2 domain-containing protein ( <i>T. equinum</i> )               |
| TERG_12321 | -3.19 | -2.64 | -2.75 | hypothetical protein                                                  |
| TERG_01360 | -3.21 | -2.51 | -1.99 | C6 transcription factor, putative ( <i>T. verrucosum</i> )            |
| TERG_12474 | -3.26 | -3.30 | -2.12 | ABC transporter ( <i>T. tonsurans</i> )                               |
| TERG_08261 | -3.27 | -3.53 | -3.75 | glutamate decarboxylase                                               |
| TERG_08264 | -3.30 | -2.57 | -1.55 | L-xylulose reductase                                                  |
| TERG_12504 | -3.45 | -3.64 | -2.89 | MFS multidrug transporter ( <i>T. equinum</i> )                       |
| TERG_02365 | -3.50 | -3.81 | -3.32 | hypothetical protein                                                  |
| TERG_01981 | -3.58 | -3.02 | -2.52 | hypothetical protein                                                  |
| TERG_05445 | -3.58 | -3.95 | -7.99 | DUF323 domain-containing protein ( <i>T. equinum</i> )                |
| TERG_12503 | -3.68 | -3.46 | -2.79 | polyamine transporter 2                                               |
| TERG_06484 | -3.79 | -5.51 | -4.94 | MYB DNA-binding domain-containing protein ( <i>T. tonsurans</i> )     |
| TERG_11630 | -3.83 | -3.84 | -4.54 | hypothetical protein                                                  |
| TERG_00483 | -3.89 | -3.61 | -3.04 | hypothetical protein                                                  |
| TERG_02843 | -3.93 | -3.38 | -3.09 | C6 transcription factor ( <i>T. equinum</i> )                         |
| TERG_05943 | -3.94 | -4.47 | -4.42 | aminotransferase, class III ( <i>T. verrucosum</i> )                  |
| TERG_12475 | -4.08 | -3.55 | -2.49 | ABC transporter, putative ( <i>A. benhamiae</i> )                     |
| TERG_00856 | -4.14 | -5.31 | -3.84 | phytanoyl-CoA dioxygenase ( <i>T. equinum</i> )                       |
| TERG_06802 | -4.34 | -4.00 | -4.52 | hypothetical protein                                                  |
| TERG_03314 | -4.46 | -5.08 | -5.11 | TfdA family oxidoreductase, putative ( <i>T. verrucosum</i> )         |
| TERG_01279 | -4.48 | -5.65 | -5.17 | flavin-binding monooxygenase ( <i>T. equinum</i> )                    |
| TERG_01599 | -4.51 | -5.36 | -4.71 | hypothetical protein                                                  |
| TERG_02132 | -4.53 | -5.03 | -4.95 | 5-histidylcysteine sulfoxide synthase                                 |
| TERG_02133 | -4.68 | -3.92 | -3.91 | fluG protein ( <i>T. equinum</i> )                                    |
| TERG_00714 | -4.73 | -4.98 | -5.47 | cell pattern formation-associated protein ( <i>T. tonsurans</i> )     |
| TERG_00852 | -4.77 | -4.55 | -3.59 | Phytanoyl-CoA dioxygenase PhyH ( <i>T. equinum</i> )                  |
| TERG_06055 | -5.01 | -4.93 | -1.96 | NmrA-like family protein ( <i>A. benhamiae</i> )                      |
| TERG_04282 | -5.16 | -7.00 | -5.57 | GPI ethanolamine phosphate transferase ( <i>T. tonsurans</i> )        |
| TERG_12156 | -5.27 | -4.48 | -3.76 | hypothetical protein                                                  |
| TERG_02844 | -5.43 | -4.79 | -3.50 | major facilitator superfamily transporter ( <i>T. tonsurans</i> )     |
| TERG_08444 | -5.55 | -6.11 | -2.74 | CipC protein ( <i>M. canis</i> )                                      |
| TERG_06054 | -5.59 | -6.14 | -2.08 | hypothetical protein                                                  |
| TERG_04028 | -5.62 | -6.11 | -4.15 | cytochrome P450, putative ( <i>T. verrucosum</i> )                    |
| TERG_03161 | -6.30 | -7.26 | -5.86 | hypothetical protein                                                  |
| TERG_06267 | -6.52 | -8.01 | -8.73 | hypothetical protein                                                  |
| TERG_02842 | -6.86 | -5.41 | -4.31 | 6-hydroxy-D-nicotine oxidase ( <i>T. equinum</i> )                    |

|            |       |       |       |                                                                      |
|------------|-------|-------|-------|----------------------------------------------------------------------|
| TERG_02134 | -7.13 | -6.28 | -5.49 | indoleamine 2,3-dioxygenase ( <i>T. equinum</i> )                    |
| TERG_02412 | -7.24 | -4.40 | -2.49 | HHE domain protein ( <i>T. verrucosum</i> )                          |
| TERG_06049 | -8.17 | -6.83 | -5.95 | dimethylallyl tryptophan synthase, putative ( <i>T. verrucosum</i> ) |

Gene expression values are expressed in log<sub>2</sub> fold change.

#### ***ΔstuA* vs. wild type (Keratin)**

| <b>ID</b>  | <b>24 hours</b> | <b>48 hours</b> | <b>96 hours</b> | <b>Gene Product Name</b>                                         |
|------------|-----------------|-----------------|-----------------|------------------------------------------------------------------|
| TERG_05733 | 6.08            |                 |                 | salivary glue protein Sgs-3 ( <i>M. canis</i> )                  |
| TERG_12089 | 4.72            |                 |                 | cytochrome P450, putative ( <i>T. verrucosum</i> )               |
| TERG_12088 | 4.24            |                 |                 | cytochrome P450 ( <i>T. equinum</i> )                            |
| TERG_01393 | 3.23            |                 |                 | hypothetical protein                                             |
| TERG_12198 | 3.15            |                 |                 | hypothetical protein                                             |
| TERG_06839 | 3.14            |                 |                 | extracellular proline-rich protein ( <i>T. verrucosum</i> )      |
| TERG_05157 | 3.02            |                 |                 | hypothetical protein                                             |
| TERG_00736 | 2.89            |                 |                 | alpha/beta hydrolase, putative ( <i>A. benhamiae</i> )           |
| TERG_06499 | 2.87            |                 |                 | hypothetical protein                                             |
| TERG_05443 | 2.79            |                 |                 | hypothetical protein                                             |
| TERG_06445 | 2.53            |                 |                 | hypothetical protein                                             |
| TERG_08837 | 2.49            |                 |                 | hypothetical protein                                             |
| TERG_07490 | 2.41            |                 |                 | secreted protein ( <i>M. gypseum</i> )                           |
| TERG_00575 | 2.39            |                 |                 | F-box domain protein ( <i>T. verrucosum</i> )                    |
| TERG_03837 | 2.37            |                 |                 | threo-3-hydroxyaspartate ammonia-lyase ( <i>T. equinum</i> )     |
| TERG_06933 | 2.35            |                 |                 | hypothetical protein                                             |
| TERG_08077 | 2.34            |                 |                 | hypothetical protein                                             |
| TERG_03255 | 2.31            |                 |                 | hypothetical protein                                             |
| TERG_05310 | 2.28            |                 |                 | kynurenine 3-monooxygenase ( <i>T. tonsurans</i> )               |
| TERG_04951 | 2.26            |                 |                 | U-box domain-containing protein ( <i>T. equinum</i> )            |
| TERG_05851 | 2.24            |                 |                 | hypothetical protein                                             |
| TERG_04937 | 2.23            |                 |                 | alpha/beta hydrolase ( <i>T. equinum</i> )                       |
| TERG_08700 | 2.21            |                 |                 | DUF895 domain membrane protein ( <i>T. equinum</i> )             |
| TERG_07544 | 2.19            |                 |                 | lipase ( <i>T. tonsurans</i> )                                   |
| TERG_08211 | 2.17            |                 |                 | acetyltransferase, GNAT family, putative ( <i>A. benhamiae</i> ) |
| TERG_01594 | 2.04            |                 |                 | hypothetical protein                                             |
| TERG_04200 | 2.01            |                 |                 | hypothetical protein                                             |
| TERG_01782 | 2.00            |                 |                 | hypothetical protein                                             |
| TERG_04580 | 1.97            |                 |                 | NADP-specific glutamate dehydrogenase                            |
| TERG_12114 | 1.96            |                 |                 | hypothetical protein                                             |
| TERG_00967 | 1.94            |                 |                 | hypothetical protein                                             |
| TERG_02206 | 1.94            |                 |                 | ankyrin repeat-containing protein ( <i>T. equinum</i> )          |
| TERG_03208 | 1.91            |                 |                 | hypothetical protein                                             |
| TERG_01790 | 1.90            |                 |                 | meiotic RNA-binding protein 1 ( <i>A. benhamiae</i> )            |
| TERG_03857 | 1.88            |                 |                 | phosphotransferase enzyme family protein ( <i>T. equinum</i> )   |

## Supplementary Material

|            |       |                                                                                        |
|------------|-------|----------------------------------------------------------------------------------------|
| TERG_04939 | 1.84  | hypothetical protein                                                                   |
| TERG_06533 | 1.84  | glyoxalase family protein ( <i>A. benhamiae</i> )                                      |
| TERG_03473 | 1.83  | hypothetical protein                                                                   |
| TERG_01240 | 1.80  | secreted protein ( <i>T. equinum</i> )                                                 |
| TERG_04117 | 1.76  | tannase, putative ( <i>A. benhamiae</i> )                                              |
| TERG_02511 | 1.72  | salicylate hydroxylase, putative ( <i>A. benhamiae</i> )                               |
| TERG_11849 | 1.72  | hypothetical protein                                                                   |
| TERG_08400 | 1.69  | hypothetical protein                                                                   |
| TERG_02745 | 1.66  | phosphoglycerate dehydrogenase                                                         |
| TERG_08347 | 1.66  | cytochrome P450 monooxygenase, putative ( <i>A. benhamiae</i> )                        |
| TERG_06509 | 1.66  | glutamate synthase ( <i>T. tonsurans</i> )                                             |
| TERG_07479 | 1.65  | hypothetical protein                                                                   |
| TERG_07824 | 1.65  | BRCT domain-containing protein ( <i>T. equinum</i> )                                   |
| TERG_12368 | 1.62  | hypothetical protein                                                                   |
| TERG_02838 | 1.62  | hypothetical protein                                                                   |
| TERG_05429 | 1.60  | MFS multidrug transporter, putative ( <i>T. verrucosum</i> )                           |
| TERG_08334 | 1.59  | proline oxidase Put1, putative ( <i>A. benhamiae</i> )                                 |
| TERG_07683 | 1.57  | hypothetical protein                                                                   |
| TERG_08982 | 1.57  | hypothetical protein                                                                   |
| TERG_04146 | 1.55  | FAD/FMN-containing isoamyl alcohol oxidase MreA-like, putative ( <i>A. benhamiae</i> ) |
| TERG_08502 | 1.54  | peptidyl-prolyl cis-trans isomerase-like 2                                             |
| TERG_03986 | 1.54  | integral membrane protein ( <i>T. verrucosum</i> )                                     |
| TERG_05251 | 1.54  | phosphoglycerate kinase                                                                |
| TERG_03912 | 1.52  | hypothetical protein                                                                   |
| TERG_00765 | 1.52  | hypothetical protein                                                                   |
| TERG_12515 | 1.51  | DNA repair protein Dds20/Mei5, putative ( <i>A. benhamiae</i> )                        |
| TERG_08877 | -1.51 | hypothetical protein                                                                   |
| TERG_08003 | -1.52 | fungal specific transcription factor domain-containing protein ( <i>T. equinum</i> )   |
| TERG_01555 | -1.53 | L-serine dehydratase, putative ( <i>T. verrucosum</i> )                                |
| TERG_12281 | -1.53 | glycosyl hydrolase ( <i>T. tonsurans</i> )                                             |
| TERG_11699 | -1.54 | hypothetical protein                                                                   |
| TERG_11725 | -1.55 | C6 transcription factor, putative ( <i>T. verrucosum</i> )                             |
| TERG_07958 | -1.55 | myosin class II heavy chain (MHC), putative ( <i>T. verrucosum</i> )                   |
| TERG_04234 | -1.56 | hydrophobin, putative ( <i>T. verrucosum</i> )                                         |
| TERG_00855 | -1.57 | aromatic amino acid aminotransferase, putative ( <i>A. benhamiae</i> )                 |
| TERG_06331 | -1.57 | increased rDNA silencing protein IRS4 ( <i>T. equinum</i> )                            |
| TERG_04771 | -1.57 | ribonuclease T2 family, putative ( <i>A. benhamiae</i> )                               |
| TERG_03359 | -1.58 | hypothetical protein                                                                   |
| TERG_00315 | -1.60 | RAN protein kinase                                                                     |
| TERG_01262 | -1.61 | hypothetical protein                                                                   |
| TERG_05270 | -1.62 | C6 and C2H2 transcription factor RegA-like, putative ( <i>A. benhamiae</i> )           |
| TERG_03353 | -1.62 | endoglucanase ( <i>T. equinum</i> )                                                    |

|            |       |                                                                                                 |
|------------|-------|-------------------------------------------------------------------------------------------------|
| TERG_04042 | -1.63 | serine/threonine protein kinase                                                                 |
| TERG_02287 | -1.65 | calcium dependent mitochondrial carrier protein ( <i>T. tonsurans</i> )                         |
| TERG_01841 | -1.65 | hypothetical protein                                                                            |
| TERG_12232 | -1.66 | DUF221 domain-containing protein ( <i>T. equinum</i> )                                          |
| TERG_12397 | -1.67 | hypothetical protein                                                                            |
| TERG_08095 | -1.68 | MFS multidrug transporter, putative ( <i>A. benhamiae</i> )                                     |
| TERG_00510 | -1.70 | hypothetical protein                                                                            |
| TERG_08761 | -1.71 | protein bfr2                                                                                    |
| TERG_06883 | -1.72 | NAD dependent epimerase/dehydratase family protein ( <i>T. verrucosum</i> )                     |
| TERG_11624 | -1.72 | hypothetical protein                                                                            |
| TERG_02487 | -1.73 | NADPH oxidase isoform 2 ( <i>T. equinum</i> )                                                   |
| TERG_12576 | -1.73 | jumonji family transcription factor ( <i>T. equinum</i> )                                       |
| TERG_04240 | -1.76 | cupin 2 domain-containing protein ( <i>T. equinum</i> )                                         |
| TERG_00442 | -1.76 | hypothetical protein                                                                            |
| TERG_00829 | -1.76 | hypothetical protein                                                                            |
| TERG_05651 | -1.77 | hypothetical protein                                                                            |
| TERG_01726 | -1.77 | beta-lactamase ( <i>T. equinum</i> )                                                            |
| TERG_05626 | -1.78 | chitinase ( <i>T. equinum</i> )                                                                 |
| TERG_08185 | -1.78 | hypothetical protein                                                                            |
| TERG_11884 | -1.79 | ABC bile acid transporter, putative ( <i>T. verrucosum</i> )                                    |
| TERG_07723 | -1.92 | oxidoreductase, short chain dehydrogenase/reductase family superfamily ( <i>T. verrucosum</i> ) |
| TERG_01138 | -1.94 | monocarboxylate transporter 4 ( <i>M. gypseum</i> )                                             |
| TERG_00766 | -2.00 | sensor histidine kinase/response regulator, putative ( <i>A. benhamiae</i> )                    |
| TERG_07665 | -2.01 | hypothetical protein                                                                            |
| TERG_08780 | -2.01 | hypothetical protein                                                                            |
| TERG_00520 | -2.03 | hypothetical protein                                                                            |
| TERG_11710 | -2.07 | hypothetical protein                                                                            |
| TERG_03955 | -2.22 | RNA 3'-terminal phosphate cyclase, putative ( <i>T. verrucosum</i> )                            |
| TERG_07406 | -2.33 | alpha-mannosidase ( <i>T. tonsurans</i> )                                                       |
| TERG_12078 | -2.36 | hypothetical protein                                                                            |
| TERG_02133 | -2.42 | fluG protein ( <i>T. equinum</i> )                                                              |
| TERG_11574 | -2.53 | hypothetical protein                                                                            |
| TERG_07331 | -2.57 | integral membrane protein ( <i>T. tonsurans</i> )                                               |
| TERG_00088 | -2.68 | beta-xylosidase, putative ( <i>A. benhamiae</i> )                                               |
| TERG_12314 | -2.70 | hypothetical protein                                                                            |
| TERG_03160 | -3.31 | hypothetical protein                                                                            |
| TERG_04250 | -3.76 | enoyl-CoA hydratase/isomerase family protein ( <i>A. benhamiae</i> )                            |
| TERG_08585 | -3.90 | ankyrin repeat protein ( <i>A. benhamiae</i> )                                                  |
| TERG_11948 | -3.92 | hypothetical protein                                                                            |
| TERG_08806 | -4.08 | hypothetical protein                                                                            |

---

Gene expression values are expressed in log<sub>2</sub> fold change.

| ID         | 24 hours | 48 hours | 96 hours | Gene Product Name                                                            |
|------------|----------|----------|----------|------------------------------------------------------------------------------|
| TERG_04047 |          | 5.70     |          | cysteine-rich secreted protein ( <i>A. benhamiae</i> )                       |
| TERG_03198 |          | 5.07     |          | hypothetical protein                                                         |
| TERG_11907 |          | 4.95     |          | FAD binding domain containing protein ( <i>T. equinum</i> )                  |
| TERG_05408 |          | 4.64     |          | ThiJ/PfpI family protein ( <i>T. tonsurans</i> )                             |
| TERG_08285 |          | 4.59     |          | hypothetical protein                                                         |
| TERG_05144 |          | 3.73     |          | hypothetical protein                                                         |
| TERG_02715 |          | 3.17     |          | beta-lactamase ( <i>T. equinum</i> )                                         |
| TERG_07210 |          | 3.16     |          | ankyrin repeat protein ( <i>T. equinum</i> )                                 |
| TERG_12644 |          | 3.12     |          | MFS transporter, putative ( <i>A. benhamiae</i> )                            |
| TERG_08643 |          | 3.04     |          | hypothetical protein                                                         |
| TERG_07409 |          | 2.96     |          | amino acid permease ( <i>T. equinum</i> )                                    |
| TERG_08666 |          | 2.84     |          | hypothetical protein                                                         |
| TERG_06784 |          | 2.70     |          | transcriptional activator of ethanol catabolism AlcS ( <i>A. benhamiae</i> ) |
| TERG_01623 |          | 2.67     |          | MFS transporter ( <i>T. equinum</i> )                                        |
| TERG_08722 |          | 2.57     |          | hypothetical protein                                                         |
| TERG_00029 |          | 2.55     |          | copper fist DNA binding domain-containing protein ( <i>T. equinum</i> )      |
| TERG_03893 |          | 2.50     |          | C6 transcription factor, putative ( <i>A. benhamiae</i> )                    |
| TERG_01930 |          | 2.42     |          | hypothetical protein                                                         |
| TERG_06291 |          | 2.40     |          | malate dehydrogenase ( <i>T. verrucosum</i> )                                |
| TERG_03157 |          | 2.40     |          | NDT80 / PhoG like DNA-binding family protein ( <i>A. benhamiae</i> )         |
| TERG_03130 |          | 2.32     |          | C2H2 transcription factor (Rpn4), putative ( <i>T. verrucosum</i> )          |
| TERG_00951 |          | 2.25     |          | hypothetical protein                                                         |
| TERG_04732 |          | 2.24     |          | hypothetical protein                                                         |
| TERG_12447 |          | 2.23     |          | F-box domain-containing protein ( <i>M. gypseum</i> )                        |
| TERG_04791 |          | 2.22     |          | hypothetical protein                                                         |
| TERG_02092 |          | 2.20     |          | hypothetical protein                                                         |
| TERG_00161 |          | 2.19     |          | hypothetical protein                                                         |
| TERG_11767 |          | 2.14     |          | amidase family protein, putative ( <i>T. verrucosum</i> )                    |
| TERG_05564 |          | 2.11     |          | hypothetical protein                                                         |
| TERG_08262 |          | 2.09     |          | C6 transcription factor, putative ( <i>A. benhamiae</i> )                    |
| TERG_08074 |          | 2.09     |          | hypothetical protein                                                         |
| TERG_00351 |          | 2.08     |          | eukaryotic translation initiation factor eIF-2C4 ( <i>T. tonsurans</i> )     |
| TERG_11853 |          | 2.07     |          | hypothetical protein                                                         |
| TERG_07031 |          | 2.06     |          | hypothetical protein                                                         |
| TERG_07594 |          | 2.05     |          | cytidylyltransferase ( <i>T. tonsurans</i> )                                 |
| TERG_02349 |          | 2.05     |          | hypothetical protein                                                         |
| TERG_02122 |          | 2.04     |          | adenylate-forming enzyme, putative ( <i>A. benhamiae</i> )                   |
| TERG_11705 |          | 2.03     |          | hypothetical protein                                                         |
| TERG_07410 |          | 2.02     |          | hypothetical protein                                                         |
| TERG_11582 |          | 2.01     |          | hypothetical protein                                                         |
| TERG_02569 |          | 1.99     |          | conserved serine proline-rich protein ( <i>A. benhamiae</i> )                |

|            |      |                                                                                  |
|------------|------|----------------------------------------------------------------------------------|
| TERG_12462 | 1.98 | hydroxymethylglutaryl-CoA reductase (NADPH)                                      |
| TERG_06515 | 1.93 | tetracycline transporter ( <i>T. equinum</i> )                                   |
| TERG_02076 | 1.91 | hypothetical protein                                                             |
| TERG_12252 | 1.90 | GTP-binding protein ( <i>T. tonsurans</i> )                                      |
| TERG_01212 | 1.89 | mRNA binding protein Pumilio 2, putative ( <i>T. verrucosum</i> )                |
| TERG_11655 | 1.88 | hypothetical protein                                                             |
| TERG_02065 | 1.88 | tetratricopeptide repeat protein ( <i>T. verrucosum</i> )                        |
| TERG_01645 | 1.86 | mitochondrial carrier protein ( <i>T. tonsurans</i> )                            |
| TERG_01510 | 1.84 | proline-specific permease ( <i>T. tonsurans</i> )                                |
| TERG_04875 | 1.84 | monocarboxylate permease ( <i>T. equinum</i> )                                   |
| TERG_01725 | 1.84 | galactonate dehydratase ( <i>T. equinum</i> )                                    |
| TERG_08990 | 1.83 | hypothetical protein                                                             |
| TERG_11586 | 1.83 | phosphoketolase ( <i>T. tonsurans</i> )                                          |
| TERG_08191 | 1.82 | glucooligosaccharide oxidase ( <i>T. equinum</i> )                               |
| TERG_02714 | 1.81 | proteinase, putative ( <i>A. benhamiae</i> )                                     |
| TERG_02066 | 1.81 | MGS207 protein ( <i>M. gypseum</i> )                                             |
| TERG_00754 | 1.80 | hypothetical protein                                                             |
| TERG_07317 | 1.80 | phosphatidylinositol phospholipase C ( <i>T. tonsurans</i> )                     |
| TERG_07252 | 1.78 | hypothetical protein                                                             |
| TERG_03364 | 1.78 | hypothetical protein                                                             |
| TERG_00912 | 1.78 | hypothetical protein                                                             |
| TERG_01761 | 1.78 | hypothetical protein                                                             |
| TERG_02469 | 1.77 | hypothetical protein                                                             |
| TERG_04901 | 1.77 | TBC1 domain family member 20 ( <i>T. equinum</i> )                               |
| TERG_08049 | 1.75 | cation diffusion facilitator, putative ( <i>T. verrucosum</i> )                  |
| TERG_03695 | 1.74 | pyrroline-5-carboxylate reductase                                                |
| TERG_07184 | 1.73 | HMG box transcriptional regulator, putative ( <i>A. benhamiae</i> )              |
| TERG_00895 | 1.73 | hypothetical protein                                                             |
| TERG_01223 | 1.73 | F-box domain protein ( <i>T. verrucosum</i> )                                    |
| TERG_12434 | 1.73 | hypothetical protein                                                             |
| TERG_07761 | 1.72 | hypothetical protein                                                             |
| TERG_01916 | 1.72 | TdiA protein ( <i>T. equinum</i> )                                               |
| TERG_12531 | 1.72 | hypothetical protein                                                             |
| TERG_08821 | 1.71 | ribosome biogenesis ( <i>T. equinum</i> )                                        |
| TERG_11801 | 1.71 | serine/threonine protein kinase ( <i>T. equinum</i> )                            |
| TERG_02867 | 1.70 | ribosome biogenesis ATPase RIX7 ( <i>T. tonsurans</i> )                          |
| TERG_11800 | 1.69 | serine/threonine protein kinase ( <i>T. equinum</i> )                            |
| TERG_02405 | 1.68 | mating locus protein, putative ( <i>T. verrucosum</i> )                          |
| TERG_01394 | 1.68 | cytochrome P450 alkane hydroxylase, putative ( <i>T. verrucosum</i> )            |
| TERG_02820 | 1.68 | polyketide synthase ( <i>T. tonsurans</i> )                                      |
| TERG_00585 | 1.67 | indoleamine 2,3-dioxygenase pyrrole 2,3-dioxygenase ( <i>A. benhamiae</i> )      |
| TERG_04778 | 1.67 | ribosome assembly and transport protein Srp40, putative ( <i>T. verrucosum</i> ) |
| TERG_11516 | 1.66 | hypothetical protein                                                             |

## Supplementary Material

|            |      |                                                                              |
|------------|------|------------------------------------------------------------------------------|
| TERG_12533 | 1.66 | hypothetical protein                                                         |
| TERG_04206 | 1.66 | AT DNA binding protein ( <i>T. equinum</i> )                                 |
| TERG_07436 | 1.66 | ATP-dependent RNA helicase mss116 ( <i>T. equinum</i> )                      |
| TERG_05142 | 1.66 | dimeric dihydrodiol dehydrogenase, putative ( <i>T. verrucosum</i> )         |
| TERG_08216 | 1.65 | ATP-dependent RNA helicase dbp6 ( <i>T. equinum</i> )                        |
| TERG_07577 | 1.64 | KOW motif domain protein ( <i>T. verrucosum</i> )                            |
| TERG_07222 | 1.64 | carbonic anhydrase family protein ( <i>T. verrucosum</i> )                   |
| TERG_03026 | 1.64 | WD repeat protein ( <i>T. tonsurans</i> )                                    |
| TERG_08047 | 1.63 | hypothetical protein                                                         |
| TERG_05023 | 1.62 | calcium/proton exchanger                                                     |
| TERG_01907 | 1.62 | hypothetical protein                                                         |
| TERG_04949 | 1.61 | siderophore iron transporter mirC                                            |
| TERG_07760 | 1.61 | integral membrane protein ( <i>T. verrucosum</i> )                           |
| TERG_04731 | 1.61 | STE/STE20 protein kinase ( <i>T. equinum</i> )                               |
| TERG_04359 | 1.61 | hypothetical protein                                                         |
| TERG_11757 | 1.61 | hypothetical protein                                                         |
| TERG_11694 | 1.61 | hypothetical protein                                                         |
| TERG_00192 | 1.61 | ATP-dependent rRNA helicase spb4 ( <i>T. tonsurans</i> )                     |
| TERG_00253 | 1.60 | HNRNP arginine N-methyltransferase ( <i>T. tonsurans</i> )                   |
| TERG_01368 | 1.59 | Ribosomal protein L7Ae/L30e/S12e/Gadd45 family protein ( <i>T. equinum</i> ) |
| TERG_08298 | 1.59 | RTA1 domain-containing protein ( <i>T. equinum</i> )                         |
| TERG_01210 | 1.59 | hypothetical protein                                                         |
| TERG_05724 | 1.59 | hypothetical protein                                                         |
| TERG_04493 | 1.58 | meiotic PUF family protein 1 ( <i>A. benhamiae</i> )                         |
| TERG_08342 | 1.58 | CMGC/SRPK protein kinase ( <i>T. tonsurans</i> )                             |
| TERG_05384 | 1.58 | hypothetical protein                                                         |
| TERG_05557 | 1.58 | cobW domain-containing protein ( <i>T. equinum</i> )                         |
| TERG_01811 | 1.58 | triacylglycerol lipase, putative ( <i>A. benhamiae</i> )                     |
| TERG_02562 | 1.58 | chitin synthase C                                                            |
| TERG_01968 | 1.57 | RNA binding protein, putative ( <i>T. verrucosum</i> )                       |
| TERG_03704 | 1.56 | integral membrane protein Pth11-like, putative ( <i>T. verrucosum</i> )      |
| TERG_08333 | 1.56 | 1-pyrroline-5-carboxylate dehydrogenase                                      |
| TERG_12058 | 1.55 | transporter smf2 ( <i>T. tonsurans</i> )                                     |
| TERG_05435 | 1.55 | hypothetical protein                                                         |
| TERG_08142 | 1.54 | tRNA-dihydrouridine synthase ( <i>T. equinum</i> )                           |
| TERG_04309 | 1.54 | multidrug resistance protein ( <i>T. equinum</i> )                           |
| TERG_12292 | 1.53 | hypothetical protein                                                         |
| TERG_02406 | 1.53 | alpha-box mating type protein ( <i>T. tonsurans</i> )                        |
| TERG_00159 | 1.53 | hypothetical protein                                                         |
| TERG_08004 | 1.53 | hypothetical protein                                                         |
| TERG_05388 | 1.52 | ribosome biogenesis protein ( <i>T. tonsurans</i> )                          |
| TERG_07408 | 1.52 | acetyltransferase, GNAT family ( <i>A. benhamiae</i> )                       |
| TERG_02257 | 1.52 | DNA-directed RNA polymerase                                                  |



|            |       |                                                                                           |
|------------|-------|-------------------------------------------------------------------------------------------|
| TERG_12461 | 1.52  | HMG-CoA reductase ( <i>A. benhamiae</i> )                                                 |
| TERG_05401 | 1.52  | rRNA processing protein Bystin ( <i>T. tonsurans</i> )                                    |
| TERG_00631 | 1.52  | urate oxidase                                                                             |
| TERG_12408 | 1.52  | purine nucleoside phosphorylase I ( <i>T. tonsurans</i> )                                 |
| TERG_02672 | 1.52  | ATP-dependent RNA helicase has1                                                           |
| TERG_06328 | 1.51  | AdoMet-dependent rRNA methyltransferase spb1                                              |
| TERG_12251 | 1.51  | GTP-binding protein ( <i>T. tonsurans</i> )                                               |
| TERG_06433 | 1.51  | mitochondrial folate carrier protein ( <i>T. tonsurans</i> )                              |
| TERG_03793 | 1.51  | elongation factor 3 ( <i>M. gypseum</i> )                                                 |
| TERG_00196 | 1.51  | hypothetical protein                                                                      |
| TERG_00508 | -1.50 | hypothetical protein                                                                      |
| TERG_00227 | -1.51 | glutamine amidotransferase subunit pdxT ( <i>T. equinum</i> )                             |
| TERG_01754 | -1.51 | oxidoreductase, 2-nitropropane dioxygenase family, putative ( <i>A. benhamiae</i> )       |
| TERG_02131 | -1.51 | hypothetical protein                                                                      |
| TERG_08961 | -1.52 | hypothetical protein                                                                      |
| TERG_01052 | -1.52 | coenzyme A transferase, putative ( <i>A. benhamiae</i> )                                  |
| TERG_03753 | -1.53 | hypothetical protein                                                                      |
| TERG_07678 | -1.53 | endoribonuclease L-PSP ( <i>T. tonsurans</i> )                                            |
| TERG_01143 | -1.53 | CMGC protein kinase ( <i>T. tonsurans</i> )                                               |
| TERG_08854 | -1.53 | mitochondrial hypoxia responsive domain-containing protein ( <i>T. tonsurans</i> )        |
| TERG_07334 | -1.54 | HIT domain-containing protein ( <i>T. equinum</i> )                                       |
| TERG_08057 | -1.55 | hypothetical protein                                                                      |
| TERG_02767 | -1.55 | pyroglutamyl peptidase type I ( <i>T. equinum</i> )                                       |
| TERG_07287 | -1.55 | hypothetical protein                                                                      |
| TERG_01172 | -1.56 | hypothetical protein                                                                      |
| TERG_05579 | -1.56 | FAD dependent oxidoreductase, putative ( <i>A. benhamiae</i> )                            |
| TERG_00642 | -1.56 | HHE domain-containing protein ( <i>T. equinum</i> )                                       |
| TERG_01079 | -1.56 | prenyltransferase ( <i>T. equinum</i> )                                                   |
| TERG_00197 | -1.57 | aldose 1-epimerase family protein, putative ( <i>T. verrucosum</i> )                      |
| TERG_00204 | -1.59 | mannitol-1-phosphate 5-dehydrogenase                                                      |
| TERG_05363 | -1.59 | hypothetical protein                                                                      |
| TERG_07089 | -1.59 | GPI-anchored wall transfer protein 1 ( <i>T. tonsurans</i> )                              |
| TERG_06521 | -1.60 | hypothetical protein                                                                      |
| TERG_01509 | -1.62 | hypothetical protein                                                                      |
| TERG_05643 | -1.64 | hypothetical protein                                                                      |
| TERG_06838 | -1.64 | oxalate/formate antiporter, putative ( <i>T. verrucosum</i> )                             |
| TERG_04521 | -1.65 | HypA-like protein, putative ( <i>A. benhamiae</i> )                                       |
| TERG_02041 | -1.65 | glutathione S-transferase ( <i>T. equinum</i> )                                           |
| TERG_03780 | -1.67 | pyruvate dehydrogenase dihydrolipoamide acetyltransferase component ( <i>M. gypseum</i> ) |
| TERG_08240 | -1.68 | methyltransferase, putative ( <i>T. verrucosum</i> )                                      |
| TERG_07291 | -1.68 | hypothetical protein                                                                      |
| TERG_03154 | -1.68 | 2-nitropropane dioxygenase ( <i>M. gypseum</i> )                                          |
| TERG_06178 | -1.69 | calpain-like protein ( <i>T. verrucosum</i> )                                             |

## Supplementary Material

|            |       |                                                                                       |
|------------|-------|---------------------------------------------------------------------------------------|
| TERG_12323 | -1.70 | hypothetical protein                                                                  |
| TERG_06402 | -1.73 | Ser/Thr protein phosphatase family protein ( <i>T. verrucosum</i> )                   |
| TERG_00563 | -1.73 | GNAT family N-acetyltransferase, putative ( <i>A. benhamiae</i> )                     |
| TERG_05339 | -1.73 | endonuclease/exonuclease/phosphatase ( <i>T. equinum</i> )                            |
| TERG_07139 | -1.74 | hypothetical protein                                                                  |
| TERG_11792 | -1.75 | hypothetical protein                                                                  |
| TERG_06908 | -1.77 | raffinose synthase protein Sip1, putative ( <i>T. verrucosum</i> )                    |
| TERG_07876 | -1.77 | hypothetical protein                                                                  |
| TERG_05601 | -1.77 | MFS transporter ( <i>T. equinum</i> )                                                 |
| TERG_07964 | -1.78 | vacuolar endopolyphosphatase, putative ( <i>T. verrucosum</i> )                       |
| TERG_05452 | -1.78 | GABA permease ( <i>T. tonsurans</i> )                                                 |
| TERG_05290 | -1.80 | C6 finger domain-containing protein ( <i>T. tonsurans</i> )                           |
| TERG_02851 | -1.83 | hypothetical protein                                                                  |
| TERG_02546 | -1.85 | acetyltransferase ( <i>T. tonsurans</i> )                                             |
| TERG_06594 | -1.86 | DUF1183 domain-containing protein ( <i>T. equinum</i> )                               |
| TERG_03218 | -1.86 | extracellular salicylate hydroxylase/monooxygenase, putative ( <i>T. verrucosum</i> ) |
| TERG_12188 | -1.86 | aldo/keto reductase/Endoribonuclease L-PSP ( <i>M. canis</i> )                        |
| TERG_01895 | -1.86 | pheromone processing carboxypeptidase (Sxa2), putative ( <i>T. verrucosum</i> )       |
| TERG_05201 | -1.86 | integral membrane protein ( <i>T. equinum</i> )                                       |
| TERG_06332 | -1.86 | AGC/AKT protein kinase                                                                |
| TERG_11986 | -1.86 | GABA permease, putative ( <i>A. benhamiae</i> )                                       |
| TERG_12721 | -1.87 | transferase ( <i>M. canis</i> )                                                       |
| TERG_00538 | -1.87 | oxidoreductase ( <i>T. tonsurans</i> )                                                |
| TERG_01177 | -1.90 | cytochrome P450 51 ( <i>T. equinum</i> )                                              |
| TERG_12032 | -1.91 | hypothetical protein                                                                  |
| TERG_05650 | -1.91 | blasticidin-resistance protein ( <i>T. tonsurans</i> )                                |
| TERG_07983 | -1.93 | hypothetical protein                                                                  |
| TERG_07280 | -1.94 | hypothetical protein                                                                  |
| TERG_03422 | -1.96 | hypothetical protein                                                                  |
| TERG_04741 | -1.98 | galactose-1-phosphate uridylyltransferase                                             |
| TERG_02242 | -2.01 | yeast phase specific protein ( <i>M. gypseum</i> )                                    |
| TERG_05486 | -2.03 | Atg28p ( <i>T. equinum</i> )                                                          |
| TERG_01190 | -2.04 | RNA binding protein ( <i>T. equinum</i> )                                             |
| TERG_12598 | -2.08 | hypothetical protein                                                                  |
| TERG_03533 | -2.13 | DRAP deaminase, putative ( <i>A. benhamiae</i> )                                      |
| TERG_00097 | -2.14 | hypothetical protein                                                                  |
| TERG_06062 | -2.15 | hypothetical protein                                                                  |
| TERG_02610 | -2.17 | WD repeat protein ( <i>T. verrucosum</i> )                                            |
| TERG_05876 | -2.21 | hypothetical protein                                                                  |
| TERG_07743 | -2.25 | hypothetical protein                                                                  |
| TERG_12715 | -2.25 | integral membrane protein ( <i>M. canis</i> )                                         |
| TERG_05409 | -2.29 | FAD dependent oxidoreductase ( <i>T. equinum</i> )                                    |

|            |       |                                                                 |
|------------|-------|-----------------------------------------------------------------|
| TERG_00540 | -2.35 | oxidoreductase, zinc-binding, putative ( <i>T. verrucosum</i> ) |
| TERG_06205 | -2.41 | integral membrane protein ( <i>T. tonsurans</i> )               |
| TERG_07310 | -2.42 | hypothetical protein                                            |
| TERG_07734 | -2.53 | O-methyltransferase, putative ( <i>T. verrucosum</i> )          |
| TERG_03848 | -2.69 | hypothetical protein                                            |
| TERG_08756 | -2.70 | cercosporin toxin biosynthesis protein ( <i>T. equinum</i> )    |
| TERG_01741 | -2.72 | hypothetical protein                                            |
| TERG_05032 | -2.90 | C6 transcription factor ( <i>T. equinum</i> )                   |
| TERG_06312 | -2.94 | hypothetical protein                                            |
| TERG_06466 | -3.02 | hypothetical protein                                            |
| TERG_08744 | -3.14 | hypothetical protein                                            |
| TERG_01280 | -3.25 | IgE-binding protein ( <i>A. benhamiae</i> )                     |
| TERG_01995 | -3.37 | hypothetical protein                                            |
| TERG_00026 | -5.05 | flavin-binding monooxygenase, putative ( <i>T. verrucosum</i> ) |

Gene expression values are expressed in log<sub>2</sub> fold change.

| ID         | 24 hours | 48 hours | 96 hours | Gene Product Name                                                                |
|------------|----------|----------|----------|----------------------------------------------------------------------------------|
| TERG_01659 |          |          | 5.83     | heat shock protein Hsp30-like, putative ( <i>A. benhamiae</i> )                  |
| TERG_12507 |          |          | 5.14     | hsp98-like protein ( <i>T. equinum</i> )                                         |
| TERG_07949 |          |          | 4.69     | heat shock protein 78 ( <i>T. tonsurans</i> )                                    |
| TERG_01731 |          |          | 4.27     | hypothetical protein                                                             |
| TERG_04087 |          |          | 4.12     | DnaJ domain-containing protein ( <i>T. tonsurans</i> )                           |
| TERG_07658 |          |          | 4.07     | hsp88-like protein ( <i>T. tonsurans</i> )                                       |
| TERG_06505 |          |          | 3.99     | hsp70-like protein                                                               |
| TERG_01661 |          |          | 3.82     | fumarylacetoacetate hydrolase domain-containing protein 2A ( <i>T. equinum</i> ) |
| TERG_06963 |          |          | 3.72     | hsp90-like protein                                                               |
| TERG_05922 |          |          | 3.61     | acyl-CoA desaturase                                                              |
| TERG_04141 |          |          | 3.42     | hsp60-like protein                                                               |
| TERG_04032 |          |          | 3.39     | DNA repair and transcription factor Ada, putative ( <i>A. benhamiae</i> )        |
| TERG_06634 |          |          | 3.37     | hsp70-like protein ( <i>T. equinum</i> )                                         |
| TERG_02590 |          |          | 3.37     | peptidyl-prolyl cis-trans isomerase D                                            |
| TERG_03677 |          |          | 3.19     | protein phosphatase regulatory subunit Gac1, putative ( <i>T. verrucosum</i> )   |
| TERG_05655 |          |          | 3.19     | AN1 zinc finger protein ( <i>T. equinum</i> )                                    |
| TERG_00669 |          |          | 3.11     | C-5 sterol desaturase ( <i>T. tonsurans</i> )                                    |
| TERG_01683 |          |          | 3.05     | hypothetical protein                                                             |
| TERG_12448 |          |          | 3.02     | hypothetical protein                                                             |
| TERG_07959 |          |          | 3.01     | GPI-anchored cell wall beta-1,3-endoglucanase EglC ( <i>A. benhamiae</i> )       |
| TERG_03105 |          |          | 3.00     | hypothetical protein                                                             |
| TERG_03102 |          |          | 3.00     | sterol 24-C-methyltransferase ( <i>T. equinum</i> )                              |
| TERG_01893 |          |          | 2.92     | hypothetical protein                                                             |
| TERG_12618 |          |          | 2.91     | hypothetical protein                                                             |

|            |                                                                                     |
|------------|-------------------------------------------------------------------------------------|
| TERG_07570 | 2.89 G-protein signaling regulator, putative ( <i>T. verrucosum</i> )               |
| TERG_06756 | 2.88 DnaJ domain protein ( <i>A. benhamiae</i> )                                    |
| TERG_06104 | 2.85 chaperone DnaJ                                                                 |
| TERG_08533 | 2.83 poly(A) polymerase Cid1 ( <i>T. equinum</i> )                                  |
| TERG_00243 | 2.80 pathogenesis associated protein Cap20, putative ( <i>T. verrucosum</i> )       |
| TERG_06496 | 2.77 coproporphyrinogen III oxidase ( <i>T. tonsurans</i> )                         |
| TERG_08528 | 2.73 fatty acid synthase beta subunit dehydratase ( <i>T. tonsurans</i> )           |
| TERG_12519 | 2.72 hypothetical protein                                                           |
| TERG_02166 | 2.72 oxidoreductase ( <i>T. equinum</i> )                                           |
| TERG_05717 | 2.71 squalene epoxidase ( <i>T. equinum</i> )                                       |
| TERG_01843 | 2.70 inositol-3-phosphate synthase ( <i>T. tonsurans</i> )                          |
| TERG_12038 | 2.70 protein phosphatase regulatory subunit Gac1, putative ( <i>T. verrucosum</i> ) |
| TERG_08312 | 2.68 mitochondrial heat shock protein Hsp10 ( <i>A. benhamiae</i> )                 |
| TERG_03506 | 2.65 hypothetical protein                                                           |
| TERG_04956 | 2.65 hypothetical protein                                                           |
| TERG_00668 | 2.64 L-galactose dehydrogenase ( <i>T. tonsurans</i> )                              |
| TERG_06398 | 2.61 Hsp90 co-chaperone Cdc37 ( <i>T. tonsurans</i> )                               |
| TERG_12619 | 2.59 hypothetical protein                                                           |
| TERG_12701 | 2.58 fatty acid synthase subunit alpha                                              |
| TERG_07274 | 2.57 hypothetical protein                                                           |
| TERG_00339 | 2.56 hydroxymethylglutaryl-CoA synthase                                             |
| TERG_02186 | 2.55 ABC multidrug transporter, putative ( <i>A. benhamiae</i> )                    |
| TERG_08090 | 2.51 plasma membrane iron permease ( <i>T. tonsurans</i> )                          |
| TERG_12700 | 2.42 fatty acid synthase subunit alpha                                              |
| TERG_03065 | 2.37 NADP-dependent malic enzyme MaeA ( <i>T. tonsurans</i> )                       |
| TERG_01609 | 2.36 Na/K ATPase alpha 1 subunit ( <i>T. equinum</i> )                              |
| TERG_01364 | 2.36 hypothetical protein                                                           |
| TERG_07477 | 2.35 copper-sulfate regulated protein 1 ( <i>T. equinum</i> )                       |
| TERG_01379 | 2.34 serine/threonine-protein phosphatase 2A activator 2 ( <i>T. equinum</i> )      |
| TERG_00066 | 2.34 4-hydroxyphenylpyruvate dioxygenase                                            |
| TERG_08845 | 2.31 pyridoxamine phosphate oxidase ( <i>T. tonsurans</i> )                         |
| TERG_03380 | 2.29 FK506-binding protein 1A ( <i>T. equinum</i> )                                 |
| TERG_02809 | 2.24 hypothetical protein                                                           |
| TERG_11969 | 2.23 NAD-specific glutamate dehydrogenase ( <i>M. gypseum</i> )                     |
| TERG_05575 | 2.20 MFS multidrug transporter ( <i>T. tonsurans</i> )                              |
| TERG_06693 | 2.19 integral membrane protein ( <i>T. equinum</i> )                                |
| TERG_00890 | 2.17 cell surface protein, putative ( <i>T. verrucosum</i> )                        |
| TERG_04964 | 2.16 RNA-binding protein ( <i>A. benhamiae</i> )                                    |
| TERG_07652 | 2.16 Delta(12) fatty acid desaturase ( <i>T. equinum</i> )                          |
| TERG_08228 | 2.13 sphinganine hydroxylase ( <i>T. tonsurans</i> )                                |
| TERG_03384 | 2.13 aspartate aminotransferase, putative ( <i>A. benhamiae</i> )                   |
| TERG_00574 | 2.12 MFS multidrug transporter, putative ( <i>T. verrucosum</i> )                   |

|            |                                                                                           |
|------------|-------------------------------------------------------------------------------------------|
| TERG_05021 | 2.12 C6 transcription factor, putative ( <i>A. benhamiae</i> )                            |
| TERG_07083 | 2.10 hypothetical protein                                                                 |
| TERG_01411 | 2.09 Hsp90 binding co-chaperone (Sba1), putative ( <i>T. verrucosum</i> )                 |
| TERG_04382 | 2.08 c-14 sterol reductase ( <i>T. tonsurans</i> )                                        |
| TERG_06805 | 2.08 bax Inhibitor family protein ( <i>T. equinum</i> )                                   |
| TERG_05810 | 2.07 MFS maltose permease, putative ( <i>T. verrucosum</i> )                              |
| TERG_11621 | 2.06 hypothetical protein                                                                 |
| TERG_06504 | 2.06 hypothetical protein                                                                 |
| TERG_06167 | 2.03 hypothetical protein                                                                 |
| TERG_04688 | 2.03 salicylate hydroxylase, putative ( <i>T. verrucosum</i> )                            |
| TERG_06399 | 2.02 ATP-dependent permease MDL2 ( <i>T. equinum</i> )                                    |
| TERG_06070 | 2.01 polysaccharide synthase Cps1 ( <i>T. tonsurans</i> )                                 |
| TERG_03052 | 1.99 glycosyl hydrolase ( <i>T. tonsurans</i> )                                           |
| TERG_01419 | 1.99 protein pyrABCN                                                                      |
| TERG_12107 | 1.98 1,4-alpha-glucan-branching enzyme                                                    |
| TERG_07552 | 1.97 hypothetical protein                                                                 |
| TERG_06869 | 1.97 DNA-directed RNA polymerase III subunit RPC6 ( <i>T. equinum</i> )                   |
| TERG_07320 | 1.97 hypothetical protein                                                                 |
| TERG_11968 | 1.96 hypothetical protein                                                                 |
| TERG_06308 | 1.96 XPG I-region protein ( <i>M. gypseum</i> )                                           |
| TERG_05172 | 1.96 pyridine nucleotide-disulphide oxidoreductase family protein ( <i>A. benhamiae</i> ) |
| TERG_08405 | 1.95 leucine aminopeptidase 2                                                             |
| TERG_07138 | 1.94 polyubiquitin                                                                        |
| TERG_06938 | 1.94 zinc metallopeptidase ( <i>T. tonsurans</i> )                                        |
| TERG_12610 | 1.93 CCAAT-box-binding transcription factor ( <i>T. equinum</i> )                         |
| TERG_03054 | 1.93 glycosyl hydrolase ( <i>T. tonsurans</i> )                                           |
| TERG_02529 | 1.93 hypothetical protein                                                                 |
| TERG_03514 | 1.92 mitochondrial co-chaperone GrpE ( <i>T. tonsurans</i> )                              |
| TERG_04043 | 1.91 hypothetical protein                                                                 |
| TERG_03775 | 1.91 fructose-2,6-bisphosphatase ( <i>T. tonsurans</i> )                                  |
| TERG_00302 | 1.91 GTP-binding protein rho2                                                             |
| TERG_08139 | 1.90 NAD dependent epimerase/dehydratase ( <i>M. gypseum</i> )                            |
| TERG_07950 | 1.90 translation elongation factor 1 subunit Eef1-beta ( <i>T. equinum</i> )              |
| TERG_01787 | 1.90 integral membrane protein ( <i>T. equinum</i> )                                      |
| TERG_03414 | 1.90 acetyl-CoA carboxylase ( <i>T. equinum</i> )                                         |
| TERG_00067 | 1.90 hypothetical protein                                                                 |
| TERG_03654 | 1.90 NADH-cytochrome b5 reductase 1                                                       |
| TERG_06475 | 1.90 zinc knuckle domain-containing protein ( <i>T. tonsurans</i> )                       |
| TERG_11740 | 1.89 hypothetical protein                                                                 |
| TERG_07639 | 1.89 atypical/ABC1/ABC1-B protein kinase ( <i>T. tonsurans</i> )                          |
| TERG_04153 | 1.88 60S ribosome biogenesis protein Brx1 ( <i>T. tonsurans</i> )                         |
| TERG_08091 | 1.88 conidial pigment biosynthesis oxidase Abr1/brown ( <i>T. verrucosum</i> )            |
| TERG_01785 | 1.87 HIT finger domain-containing protein ( <i>T. equinum</i> )                           |

## Supplementary Material

|            |                                                                                             |
|------------|---------------------------------------------------------------------------------------------|
| TERG_05155 | 1.86 Leucine carboxyl methyltransferase family ( <i>A. benhamiae</i> )                      |
| TERG_12108 | 1.86 1,4-alpha-glucan-branching enzyme                                                      |
| TERG_00881 | 1.85 zinc-containing alcohol dehydrogenase, putative ( <i>T. verrucosum</i> )               |
| TERG_03336 | 1.83 Sec14 cytosolic factor ( <i>T. equinum</i> )                                           |
| TERG_02327 | 1.82 rRNA biogenesis protein RRP5 ( <i>T. tonsurans</i> )                                   |
| TERG_02528 | 1.82 ubiE/COQ5 methyltransferase, putative ( <i>T. verrucosum</i> )                         |
| TERG_07720 | 1.82 copper-transporting ATPase ( <i>T. equinum</i> )                                       |
| TERG_00437 | 1.81 ribosome biogenesis protein Kri1 ( <i>T. equinum</i> )                                 |
| TERG_01881 | 1.80 hypothetical protein                                                                   |
| TERG_01612 | 1.80 enolase                                                                                |
| TERG_07444 | 1.79 nuclear segregation protein ( <i>T. tonsurans</i> )                                    |
| TERG_11642 | 1.78 forkhead transcription factor ( <i>T. tonsurans</i> )                                  |
| TERG_01883 | 1.77 hsp75-like protein                                                                     |
| TERG_02230 | 1.76 mitochondrial ribosomal protein DAP3, putative ( <i>A. benhamiae</i> )                 |
| TERG_05367 | 1.75 nucleolar complex-associated protein 3 ( <i>T. equinum</i> )                           |
| TERG_05194 | 1.75 elongation factor Tu, mitochondrial                                                    |
| TERG_05956 | 1.75 rRNA processing protein Ebp2p ( <i>T. equinum</i> )                                    |
| TERG_02979 | 1.75 Delta(24(24(1)))-sterol reductase ( <i>T. tonsurans</i> )                              |
| TERG_12345 | 1.74 kinesin family protein ( <i>T. tonsurans</i> )                                         |
| TERG_00231 | 1.74 glutamate decarboxylase ( <i>T. equinum</i> )                                          |
| TERG_07295 | 1.74 C6 finger domain protein, putative ( <i>T. verrucosum</i> )                            |
| TERG_06621 | 1.73 60S ribosomal subunit assembly/export protein loc1 ( <i>T. tonsurans</i> )             |
| TERG_00285 | 1.72 hypothetical protein                                                                   |
| TERG_07053 | 1.71 hypothetical protein                                                                   |
| TERG_05811 | 1.71 40S ribosomal protein S8 ( <i>T. tonsurans</i> )                                       |
| TERG_01523 | 1.70 hypothetical protein                                                                   |
| TERG_11940 | 1.70 hypothetical protein                                                                   |
| TERG_00359 | 1.68 MeaB protein ( <i>T. equinum</i> )                                                     |
| TERG_05110 | 1.68 37S ribosomal protein S5 ( <i>T. tonsurans</i> )                                       |
| TERG_05739 | 1.68 mitochondrial exoribonuclease Cyt-4, putative ( <i>T. verrucosum</i> )                 |
| TERG_07337 | 1.67 54S ribosomal protein RML2 ( <i>T. equinum</i> )                                       |
| TERG_02231 | 1.67 ribosome biogenesis protein ( <i>T. tonsurans</i> )                                    |
| TERG_08483 | 1.67 hypothetical protein                                                                   |
| TERG_02385 | 1.67 hypothetical protein                                                                   |
| TERG_00677 | 1.67 hypothetical protein                                                                   |
| TERG_00976 | 1.67 serine hydroxymethyltransferase, cytosolic                                             |
| TERG_12344 | 1.67 kinesin family protein ( <i>T. tonsurans</i> )                                         |
| TERG_04998 | 1.65 mitochondrial ATP-dependent RNA helicase ( <i>T. tonsurans</i> )                       |
| TERG_01619 | 1.65 toxin biosynthesis protein (Tri7), putative ( <i>T. verrucosum</i> )                   |
| TERG_08590 | 1.65 tRNA (adenine-N(1)-)-methyltransferase catalytic subunit trm61 ( <i>T. tonsurans</i> ) |
| TERG_03569 | 1.63 RING finger domain-containing protein ( <i>T. equinum</i> )                            |

|            |                                                                                      |
|------------|--------------------------------------------------------------------------------------|
| TERG_12045 | 1.63 hypothetical protein                                                            |
| TERG_08991 | 1.63 ATPase 2 nuclear control ( <i>M. gypseum</i> )                                  |
| TERG_01206 | 1.63 pre-mRNA-splicing factor ATP-dependent RNA helicase PRP43 ( <i>T. equinum</i> ) |
| TERG_04173 | 1.63 hypothetical protein                                                            |
| TERG_05942 | 1.62 integral membrane protein ( <i>T. equinum</i> )                                 |
| TERG_00213 | 1.62 hypothetical protein                                                            |
| TERG_08122 | 1.62 hypothetical protein                                                            |
| TERG_06619 | 1.62 DNA-directed RNA polymerase I and III polypeptide ( <i>T. equinum</i> )         |
| TERG_06390 | 1.61 sulfite reductase flavoprotein alpha-component ( <i>T. equinum</i> )            |
| TERG_12054 | 1.61 HEAT repeat protein ( <i>A. benhamiae</i> )                                     |
| TERG_05307 | 1.61 hypothetical protein                                                            |
| TERG_05734 | 1.61 ubiquitin fusion degradation protein ( <i>T. tonsurans</i> )                    |
| TERG_04058 | 1.60 STE/STE11 protein kinase                                                        |
| TERG_06516 | 1.60 hypothetical protein                                                            |
| TERG_04767 | 1.60 30S ribosomal protein S7 ( <i>T. tonsurans</i> )                                |
| TERG_00784 | 1.59 succinate dehydrogenase assembly factor 2, mitochondrial                        |
| TERG_00705 | 1.59 Ras family protein ( <i>T. tonsurans</i> )                                      |
| TERG_06032 | 1.59 ribosomal small subunit assembly protein, putative ( <i>A. benhamiae</i> )      |
| TERG_03139 | 1.59 hypothetical protein                                                            |
| TERG_00684 | 1.59 ubiquinol-cytochrome C chaperone ( <i>T. equinum</i> )                          |
| TERG_08511 | 1.58 hypothetical protein                                                            |
| TERG_06967 | 1.58 rnapii degradation factor def1 ( <i>T. tonsurans</i> )                          |
| TERG_00123 | 1.58 ribonuclease P complex subunit Pop1 ( <i>T. tonsurans</i> )                     |
| TERG_06739 | 1.58 hypothetical protein                                                            |
| TERG_07125 | 1.58 peptidyl-tRNA hydrolase                                                         |
| TERG_06578 | 1.57 glutathione S-transferase, putative ( <i>A. benhamiae</i> )                     |
| TERG_08655 | 1.57 ADP,ATP carrier protein                                                         |
| TERG_00931 | 1.56 hypothetical protein                                                            |
| TERG_00456 | 1.56 cysteine dioxygenase, putative ( <i>A. benhamiae</i> )                          |
| TERG_05786 | 1.55 hypothetical protein                                                            |
| TERG_06907 | 1.55 tyrosine-tRNA ligase                                                            |
| TERG_06641 | 1.54 mitochondrial mRNA processing protein PET127 ( <i>T. tonsurans</i> )            |
| TERG_08038 | 1.54 polysaccharide deacetylase family protein ( <i>T. equinum</i> )                 |
| TERG_00455 | 1.54 ribosome-interacting GTPase 1                                                   |
| TERG_00249 | 1.53 ATP-dependent rRNA helicase RRP3                                                |
| TERG_00810 | 1.52 37S ribosomal protein Rsm24 ( <i>T. equinum</i> )                               |
| TERG_01447 | 1.52 bcp1 ( <i>T. equinum</i> )                                                      |
| TERG_02420 | 1.52 hypothetical protein                                                            |
| TERG_06557 | 1.52 ribosomal protein L7/L12                                                        |
| TERG_08212 | 1.51 NOL1/NOP2/sun domain protein, putative ( <i>T. verrucosum</i> )                 |
| TERG_07111 | 1.51 tRNA-dihydrouridine synthase 3                                                  |
| TERG_03175 | 1.51 DUF833 domain protein ( <i>A. benhamiae</i> )                                   |

|            |                                                                                     |
|------------|-------------------------------------------------------------------------------------|
| TERG_00241 | 1.51 hypothetical protein                                                           |
| TERG_08540 | 1.51 rRNA-processing protein FCF1 ( <i>T. equinum</i> )                             |
| TERG_06577 | 1.51 37S ribosomal protein S9 ( <i>T. verrucosum</i> )                              |
| TERG_08258 | 1.50 hypothetical protein                                                           |
| TERG_02363 | -1.50 succinate-semialdehyde dehydrogenase ( <i>T. tonsurans</i> )                  |
| TERG_07236 | -1.50 hypothetical protein                                                          |
| TERG_04100 | -1.51 dolichyl-phosphate beta-glucosyltransferase ( <i>T. tonsurans</i> )           |
| TERG_03772 | -1.51 hypothetical protein                                                          |
| TERG_02112 | -1.51 hypothetical protein                                                          |
| TERG_07285 | -1.51 hypothetical protein                                                          |
| TERG_06378 | -1.51 hypothetical protein                                                          |
| TERG_02849 | -1.51 flavin-containing monooxygenase ( <i>T. equinum</i> )                         |
| TERG_05617 | -1.52 hypothetical protein                                                          |
| TERG_02001 | -1.52 oligopeptidase ( <i>T. tonsurans</i> )                                        |
| TERG_04763 | -1.52 fructosyl amine:oxygen oxidoreductase ( <i>T. tonsurans</i> )                 |
| TERG_05841 | -1.53 AmmeMemoRadiSam system protein B                                              |
| TERG_00969 | -1.53 hypothetical protein                                                          |
| TERG_01559 | -1.53 amino acid transporter, putative ( <i>A. benhamiae</i> )                      |
| TERG_06766 | -1.53 high affinity methionine permease ( <i>T. tonsurans</i> )                     |
| TERG_08048 | -1.53 hypothetical protein                                                          |
| TERG_01511 | -1.53 hypothetical protein                                                          |
| TERG_07158 | -1.54 cell cycle regulatory protein, putative ( <i>T. verrucosum</i> )              |
| TERG_07888 | -1.54 acyl CoA binding protein ( <i>T. tonsurans</i> )                              |
| TERG_01404 | -1.54 aldehyde dehydrogenase                                                        |
| TERG_01270 | -1.54 AMP dependent ligase ( <i>T. tonsurans</i> )                                  |
| TERG_04341 | -1.55 C6 transcription factor ( <i>T. equinum</i> )                                 |
| TERG_06131 | -1.55 hypothetical protein                                                          |
| TERG_01943 | -1.56 1-aminocyclopropane-1-carboxylate deaminase                                   |
| TERG_05309 | -1.56 major facilitator superfamily protein ( <i>T. equinum</i> )                   |
| TERG_06879 | -1.57 acetamidase ( <i>T. verrucosum</i> )                                          |
| TERG_00553 | -1.57 amino acid permease ( <i>T. equinum</i> )                                     |
| TERG_00845 | -1.57 aldolase ( <i>T. tonsurans</i> )                                              |
| TERG_05465 | -1.57 GTP-binding protein yptV5 ( <i>T. tonsurans</i> )                             |
| TERG_00292 | -1.57 hypothetical protein                                                          |
| TERG_12659 | -1.58 transferase family protein ( <i>A. benhamiae</i> )                            |
| TERG_02038 | -1.58 peroxisomal targeting signal receptor ( <i>T. equinum</i> )                   |
| TERG_08518 | -1.58 DUF614 domain protein ( <i>A. benhamiae</i> )                                 |
| TERG_08130 | -1.58 ABC ATPase ( <i>T. equinum</i> )                                              |
| TERG_01851 | -1.59 Pfs, NACHT and WD domain protein ( <i>A. benhamiae</i> )                      |
| TERG_07838 | -1.59 YjeF family domain-containing protein                                         |
| TERG_00844 | -1.60 hypothetical protein                                                          |
| TERG_06732 | -1.60 peroxisomal membrane protein receptor Pex19, putative ( <i>A. benhamiae</i> ) |
| TERG_12436 | -1.60 monocarboxylate transporter ( <i>M. canis</i> )                               |



|            |                                                                                         |
|------------|-----------------------------------------------------------------------------------------|
| TERG_03790 | -1.60 DUF1275 domain-containing protein ( <i>T. equinum</i> )                           |
| TERG_08103 | -1.61 anaphase promoting complex subunit 10 (APC10), putative ( <i>A. benhamiae</i> )   |
| TERG_05500 | -1.62 pantetheine-phosphate adenylyltransferase family protein ( <i>T. verrucosum</i> ) |
| TERG_07816 | -1.62 nitrate reductase ( <i>T. tonsurans</i> )                                         |
| TERG_01164 | -1.62 beta-alanine synthase, putative ( <i>T. verrucosum</i> )                          |
| TERG_05580 | -1.62 hypothetical protein                                                              |
| TERG_05173 | -1.63 hypothetical protein                                                              |
| TERG_05405 | -1.64 methionine permease ( <i>T. equinum</i> )                                         |
| TERG_07715 | -1.64 hypothetical protein                                                              |
| TERG_11942 | -1.64 MFS maltose permease ( <i>T. tonsurans</i> )                                      |
| TERG_00340 | -1.65 hypothetical protein                                                              |
| TERG_08264 | -1.66 L-xylulose reductase                                                              |
| TERG_08055 | -1.66 ToxD-like zinc binding oxidoreductase, putative ( <i>A. benhamiae</i> )           |
| TERG_03032 | -1.66 autophagy protein Atg13, putative ( <i>A. benhamiae</i> )                         |
| TERG_06888 | -1.67 transulfuration enzyme family protein, putative ( <i>A. benhamiae</i> )           |
| TERG_00487 | -1.67 hypothetical protein                                                              |
| TERG_00246 | -1.67 formyl-coenzyme A transferase ( <i>T. equinum</i> )                               |
| TERG_08042 | -1.68 hypothetical protein                                                              |
| TERG_08252 | -1.68 LysM domain protein, putative ( <i>A. benhamiae</i> )                             |
| TERG_05156 | -1.69 Pps1 dual specificity phosphatase ( <i>T. tonsurans</i> )                         |
| TERG_06155 | -1.69 phosphotransferase ( <i>T. tonsurans</i> )                                        |
| TERG_05299 | -1.69 glutathione S-transferase, putative ( <i>A. benhamiae</i> )                       |
| TERG_05624 | -1.70 C6 transcription factor, putative ( <i>T. verrucosum</i> )                        |
| TERG_03461 | -1.70 voltage-gated chloride channel ( <i>T. tonsurans</i> )                            |
| TERG_02064 | -1.70 peroxisomal biogenesis factor 6 ( <i>T. tonsurans</i> )                           |
| TERG_07102 | -1.71 mitochondrial distribution and morphology protein 12                              |
| TERG_11656 | -1.71 class V chitinase ( <i>T. tonsurans</i> )                                         |
| TERG_04134 | -1.72 hypothetical protein                                                              |
| TERG_01732 | -1.74 amidohydrolase ( <i>T. equinum</i> )                                              |
| TERG_00032 | -1.74 mitochondrial dicarboxylate transporter ( <i>T. tonsurans</i> )                   |
| TERG_05205 | -1.75 hypothetical protein                                                              |
| TERG_04807 | -1.75 aminotransferase ( <i>T. tonsurans</i> )                                          |
| TERG_02423 | -1.75 hypothetical protein                                                              |
| TERG_07282 | -1.75 cytochrome P450 monooxygenase, putative ( <i>T. verrucosum</i> )                  |
| TERG_01171 | -1.76 autophagy regulatory protein Atg2, putative ( <i>T. verrucosum</i> )              |
| TERG_00701 | -1.76 cytochrome b5, putative ( <i>T. verrucosum</i> )                                  |
| TERG_06240 | -1.76 peroxisomal biogenesis factor 2 ( <i>T. tonsurans</i> )                           |
| TERG_12373 | -1.77 multidrug resistance protein ( <i>T. tonsurans</i> )                              |
| TERG_06806 | -1.77 hypothetical protein                                                              |
| TERG_05918 | -1.78 glutamyl-tRNA(Gln) amidotransferase subunit A ( <i>T. equinum</i> )               |
| TERG_00989 | -1.79 prenylcysteine lyase ( <i>T. tonsurans</i> )                                      |
| TERG_02197 | -1.79 nitrilase, putative ( <i>T. verrucosum</i> )                                      |
| TERG_00878 | -1.80 hypothetical protein                                                              |

|            |                                                                                     |
|------------|-------------------------------------------------------------------------------------|
| TERG_07750 | -1.80 hypothetical protein                                                          |
| TERG_08235 | -1.80 long chain fatty alcohol oxidase ( <i>T. tonsurans</i> )                      |
| TERG_03467 | -1.80 peroxisomal membrane protein Pex17 ( <i>T. equinum</i> )                      |
| TERG_11702 | -1.80 hypothetical protein                                                          |
| TERG_05837 | -1.80 plasma membrane ammonium transporter (Ato3), putative ( <i>A. benhamiae</i> ) |
| TERG_05044 | -1.81 epoxide hydrolase, putative ( <i>A. benhamiae</i> )                           |
| TERG_08051 | -1.82 3-oxoacyl-(acyl-carrier-protein) reductase ( <i>T. tonsurans</i> )            |
| TERG_01049 | -1.83 hypothetical protein                                                          |
| TERG_05537 | -1.83 MFS multidrug transporter ( <i>T. equinum</i> )                               |
| TERG_02587 | -1.83 hypothetical protein                                                          |
| TERG_01926 | -1.84 5'/3'-nucleotidase SurE                                                       |
| TERG_08296 | -1.84 fatty acid synthase beta subunit dehydratase ( <i>M. canis</i> )              |
| TERG_12586 | -1.84 chromatin assembly factor 1 subunit A ( <i>T. tonsurans</i> )                 |
| TERG_06997 | -1.84 C6 transcription factor ( <i>T. tonsurans</i> )                               |
| TERG_05967 | -1.84 hypothetical protein                                                          |
| TERG_04620 | -1.84 peroxin 20 ( <i>T. equinum</i> )                                              |
| TERG_05615 | -1.84 hsp70-like protein ( <i>T. equinum</i> )                                      |
| TERG_12614 | -1.85 succinyl-CoA synthetase beta subunit, putative ( <i>T. verrucosum</i> )       |
| TERG_06625 | -1.86 serine protease, putative ( <i>A. benhamiae</i> )                             |
| TERG_08557 | -1.86 carboxypeptidase S1, putative ( <i>A. benhamiae</i> )                         |
| TERG_00284 | -1.86 peroxin 14 ( <i>T. tonsurans</i> )                                            |
| TERG_05258 | -1.87 MFS transporter ( <i>T. equinum</i> )                                         |
| TERG_00620 | -1.87 NAD <sup>+</sup> kinase Utr1 ( <i>T. equinum</i> )                            |
| TERG_03066 | -1.87 MFS peptide transporter, putative ( <i>T. verrucosum</i> )                    |
| TERG_02043 | -1.88 cysteine desulfurase ( <i>T. equinum</i> )                                    |
| TERG_08868 | -1.89 FKBP-type peptidyl-prolyl isomerase, putative ( <i>A. benhamiae</i> )         |
| TERG_00084 | -1.91 chromosome segregation protein (Pcs1), putative ( <i>T. verrucosum</i> )      |
| TERG_08869 | -1.91 hypothetical protein                                                          |
| TERG_03334 | -1.91 sensor histidine kinase/response regulator ( <i>T. tonsurans</i> )            |
| TERG_05747 | -1.93 alcohol dehydrogenase ( <i>T. tonsurans</i> )                                 |
| TERG_00009 | -1.93 peroxisomal biogenesis factor ( <i>T. tonsurans</i> )                         |
| TERG_08062 | -1.96 alpha-glucosidase AgdA, putative ( <i>A. benhamiae</i> )                      |
| TERG_02338 | -1.97 hypothetical protein                                                          |
| TERG_03940 | -1.97 hypothetical protein                                                          |
| TERG_03111 | -1.98 conserved proline-rich protein ( <i>A. benhamiae</i> )                        |
| TERG_00129 | -1.98 hypothetical protein                                                          |
| TERG_01853 | -1.98 hypothetical protein                                                          |
| TERG_06681 | -2.00 glycogen debranching enzyme                                                   |
| TERG_07234 | -2.01 hypothetical protein                                                          |
| TERG_02735 | -2.01 fatty acid oxygenase PpoC, putative ( <i>A. benhamiae</i> )                   |
| TERG_08054 | -2.01 homoserine acetyltransferase ( <i>T. tonsurans</i> )                          |
| TERG_07524 | -2.01 hypothetical protein                                                          |

|            |                                                                                                        |
|------------|--------------------------------------------------------------------------------------------------------|
| TERG_04962 | -2.02 hypothetical protein                                                                             |
| TERG_03161 | -2.04 hypothetical protein                                                                             |
| TERG_05771 | -2.04 hypothetical protein                                                                             |
| TERG_01833 | -2.05 peroxisomal membrane protein ( <i>T. tonsurans</i> )                                             |
| TERG_01281 | -2.07 malate synthase, glyoxysomal                                                                     |
| TERG_03541 | -2.07 hypothetical protein                                                                             |
| TERG_00481 | -2.07 beta-glucosidase, putative ( <i>T. verrucosum</i> )                                              |
| TERG_03855 | -2.08 WW domain-containing protein ( <i>M. canis</i> )                                                 |
| TERG_01674 | -2.08 hypothetical protein                                                                             |
| TERG_04810 | -2.09 bifunctional fatty acid transporter/acyl-CoA synthetase (FAT1), putative ( <i>A. benhamiae</i> ) |
| TERG_08437 | -2.12 C2H2 transcription factor (Egr2), putative ( <i>T. verrucosum</i> )                              |
| TERG_05331 | -2.12 peroxisome biosynthesis protein ( <i>T. tonsurans</i> )                                          |
| TERG_07482 | -2.12 ribonuclease H1, putative ( <i>A. benhamiae</i> )                                                |
| TERG_08070 | -2.13 enoyl-CoA hydratase/isomerase ( <i>T. tonsurans</i> )                                            |
| TERG_05374 | -2.14 hypothetical protein                                                                             |
| TERG_04099 | -2.14 hypothetical protein                                                                             |
| TERG_12698 | -2.16 serine/threonine protein kinase ( <i>T. equinum</i> )                                            |
| TERG_05608 | -2.20 hypothetical protein                                                                             |
| TERG_12681 | -2.20 alpha-mannosidase ( <i>T. tonsurans</i> )                                                        |
| TERG_00309 | -2.21 esterase, putative ( <i>A. benhamiae</i> )                                                       |
| TERG_12658 | -2.22 transferase family protein ( <i>A. benhamiae</i> )                                               |
| TERG_08050 | -2.22 acetamidase ( <i>T. equinum</i> )                                                                |
| TERG_01637 | -2.23 hypothetical protein                                                                             |
| TERG_12600 | -2.23 U3 small nucleolar ribonucleoprotein IMP4 ( <i>T. tonsurans</i> )                                |
| TERG_03947 | -2.24 hypothetical protein                                                                             |
| TERG_01936 | -2.25 COP9 signalosome complex subunit 1 ( <i>T. equinum</i> )                                         |
| TERG_02929 | -2.26 carboxylesterase, putative ( <i>T. verrucosum</i> )                                              |
| TERG_00621 | -2.26 FAD dependent oxidoreductase ( <i>T. tonsurans</i> )                                             |
| TERG_05780 | -2.27 hypothetical protein                                                                             |
| TERG_06053 | -2.32 catalase ( <i>T. tonsurans</i> )                                                                 |
| TERG_03008 | -2.35 zinc-containing alcohol dehydrogenase, putative ( <i>A. benhamiae</i> )                          |
| TERG_08058 | -2.37 alpha-1,2-mannosidase family protein ( <i>T. verrucosum</i> )                                    |
| TERG_07659 | -2.38 peroxisomal 3-ketoacyl-coA thiolase (Kat1), putative ( <i>A. benhamiae</i> )                     |
| TERG_00659 | -2.39 3-deoxy-7-phosphoheptulonate synthase                                                            |
| TERG_01489 | -2.39 MFS transporter ( <i>T. tonsurans</i> )                                                          |
| TERG_11753 | -2.43 MFS transporter ( <i>T. tonsurans</i> )                                                          |
| TERG_05150 | -2.46 tRNA wybutosine-synthesizing protein 2 ( <i>T. equinum</i> )                                     |
| TERG_04288 | -2.49 hypothetical protein                                                                             |
| TERG_00775 | -2.50 hypothetical protein                                                                             |
| TERG_01004 | -2.50 extracellular sialidase/neuraminidase ( <i>T. equinum</i> )                                      |
| TERG_03698 | -2.57 hypothetical protein                                                                             |
| TERG_04878 | -2.60 hypothetical protein                                                                             |
| TERG_01277 | -2.60 nexin-1 ( <i>T. equinum</i> )                                                                    |

|            |       |                                                                                   |
|------------|-------|-----------------------------------------------------------------------------------|
| TERG_00348 | -2.62 | sugar transporter ( <i>T. tonsurans</i> )                                         |
| TERG_07451 | -2.63 | acetoacetate-CoA ligase                                                           |
| TERG_12580 | -2.69 | dihydrodipicolinate synthetase family protein ( <i>T. verrucosum</i> )            |
| TERG_01512 | -2.74 | mitochondrial tricarboxylate transporter (Ctp), putative ( <i>T. verrucosum</i> ) |
| TERG_11881 | -2.86 | G-patch domain-containing protein ( <i>T. equinum</i> )                           |
| TERG_02335 | -2.99 | hypothetical protein                                                              |
| TERG_05948 | -3.11 | protein kinase subdomain-containing protein ( <i>T. equinum</i> )                 |
| TERG_11677 | -3.16 | solute carrier family 25 member 45 ( <i>M. gypseum</i> )                          |
| TERG_03252 | -3.17 | hypothetical protein                                                              |
| TERG_03895 | -3.18 | lipase/thioesterase family protein ( <i>A. benhamiae</i> )                        |
| TERG_05890 | -3.20 | stress response protein Rds1 ( <i>T. tonsurans</i> )                              |
| TERG_03357 | -3.27 | nonribosomal peptide synthetase ( <i>T. equinum</i> )                             |
| TERG_02474 | -3.30 | hypothetical protein                                                              |
| TERG_05347 | -3.32 | epoxide hydrolase, putative ( <i>T. verrucosum</i> )                              |
| TERG_05611 | -5.20 | hypothetical protein                                                              |
| TERG_07504 | -5.70 | sialidase ( <i>T. tonsurans</i> )                                                 |

Gene expression values are expressed in log<sub>2</sub> fold change.

| ID         | 24 hours | 48 hours | 96 hours | Gene Product Name                                                             |
|------------|----------|----------|----------|-------------------------------------------------------------------------------|
| TERG_01913 | 6.14     | 4.99     |          | cytochrome P450 monooxygenase, putative ( <i>A. benhamiae</i> )               |
| TERG_07466 | 2.92     | 3.39     |          | hypothetical protein                                                          |
| TERG_03312 | 2.92     | 2.75     |          | RTA1 domain protein, putative ( <i>A. benhamiae</i> )                         |
| TERG_03705 | 2.90     | 3.21     |          | cytochrome P450 monooxygenase, putative ( <i>A. benhamiae</i> )               |
| TERG_02307 | 2.82     | 1.83     |          | mitotic spindle checkpoint protein (Mad2B), putative ( <i>T. verrucosum</i> ) |
| TERG_03095 | 2.74     | 3.13     |          | methyltransferase, putative ( <i>A. benhamiae</i> )                           |
| TERG_06190 | 2.61     | 2.79     |          | hypothetical protein                                                          |
| TERG_08360 | 2.57     | 2.09     |          | metallo-beta-lactamase superfamily protein ( <i>T. equinum</i> )              |
| TERG_05451 | 2.55     | 2.12     |          | integral membrane protein ( <i>T. equinum</i> )                               |
| TERG_08359 | 2.46     | 1.50     |          | FAD-dependent monooxygenase ( <i>T. tonsurans</i> )                           |
| TERG_12296 | 2.44     | 1.55     |          | hypothetical protein                                                          |
| TERG_03622 | 2.41     | 2.34     |          | hypothetical protein                                                          |
| TERG_01994 | 2.39     | 1.75     |          | OPT family oligopeptide transporter                                           |
| TERG_11975 | 2.36     | 2.86     |          | integral membrane protein ( <i>T. verrucosum</i> )                            |
| TERG_12284 | 2.33     | 2.14     |          | alkaline serine protease ( <i>T. equinum</i> )                                |
| TERG_08190 | 2.32     | 3.50     |          | Mrsp1 ( <i>T. equinum</i> )                                                   |
| TERG_02298 | 2.32     | 1.63     |          | GPI anchored cell wall protein, putative ( <i>T. verrucosum</i> )             |
| TERG_06073 | 2.31     | 2.04     |          | MFS monocarboxylate transporter ( <i>T. equinum</i> )                         |
| TERG_00735 | 2.22     | 2.83     |          | hypothetical protein                                                          |
| TERG_11976 | 2.21     | 2.73     |          | integral membrane protein ( <i>T. tonsurans</i> )                             |
| TERG_00379 | 2.18     | 1.52     |          | integral membrane protein ( <i>T. equinum</i> )                               |
| TERG_03826 | 2.18     | 1.62     |          | hypothetical protein                                                          |

|            |       |       |                                                                                                  |
|------------|-------|-------|--------------------------------------------------------------------------------------------------|
| TERG_03827 | 2.18  | 2.13  | hypothetical protein                                                                             |
| TERG_03800 | 2.12  | 2.76  | hypothetical protein                                                                             |
| TERG_02513 | 2.09  | 1.70  | TAM domain methyltransferase ( <i>T. equinum</i> )                                               |
| TERG_01848 | 2.04  | 2.08  | integral membrane protein ( <i>M. gypseum</i> )                                                  |
| TERG_00119 | 2.03  | 3.95  | CAMK/CAMKL/GIN4 protein kinase                                                                   |
| TERG_00734 | 1.99  | 2.07  | dipeptidase ( <i>T. tonsurans</i> )                                                              |
| TERG_03847 | 1.99  | 2.45  | methyltransferase SirN-like, putative ( <i>T. verrucosum</i> )                                   |
| TERG_01357 | 1.96  | 2.62  | hypothetical protein                                                                             |
| TERG_07116 | 1.93  | 2.37  | aldehyde dehydrogenase ( <i>T. tonsurans</i> )                                                   |
| TERG_08114 | 1.92  | 2.69  | anaphase-promoting complex component Cut20/Apc4 ( <i>T. tonsurans</i> )                          |
| TERG_02842 | 1.91  | 1.63  | 6-hydroxy-D-nicotine oxidase ( <i>T. equinum</i> )                                               |
| TERG_01436 | 1.88  | 1.56  | oxidoreductase ( <i>T. equinum</i> )                                                             |
| TERG_08029 | 1.82  | 2.30  | HMG box protein, putative ( <i>T. verrucosum</i> )                                               |
| TERG_03343 | 1.81  | 2.91  | fatty acid desaturase ( <i>T. equinum</i> )                                                      |
| TERG_02510 | 1.79  | 2.80  | hypothetical protein                                                                             |
| TERG_05259 | 1.79  | 1.52  | cytochrome P450, putative ( <i>A. benhamiae</i> )                                                |
| TERG_03719 | 1.78  | 1.83  | MFS sugar transporter ( <i>T. tonsurans</i> )                                                    |
| TERG_03820 | 1.74  | 2.19  | hypothetical protein                                                                             |
| TERG_02286 | 1.71  | 1.79  | cell wall organization protein/glutathione transferase (Gto3), putative ( <i>T. verrucosum</i> ) |
| TERG_03024 | 1.71  | 1.51  | hypothetical protein                                                                             |
| TERG_03854 | 1.70  | 1.93  | laccase ( <i>T. tonsurans</i> )                                                                  |
| TERG_07059 | 1.69  | 1.58  | hypothetical protein                                                                             |
| TERG_00828 | 1.69  | 1.58  | hypothetical protein                                                                             |
| TERG_06748 | 1.62  | 2.16  | hypothetical protein                                                                             |
| TERG_03253 | 1.61  | 1.77  | hypothetical protein                                                                             |
| TERG_08115 | 1.59  | 1.55  | hypothetical protein                                                                             |
| TERG_05430 | 1.57  | 1.97  | hypothetical protein                                                                             |
| TERG_00599 | 1.51  | 1.99  | hypothetical protein                                                                             |
| TERG_12059 | 1.51  | 2.56  | transporter smf2 ( <i>T. tonsurans</i> )                                                         |
| TERG_06397 | -1.50 | -1.56 | alpha-1,2-mannosyltransferase ( <i>T. equinum</i> )                                              |
| TERG_01271 | -1.52 | -1.52 | isocitrate lyase                                                                                 |
| TERG_12200 | -1.53 | -1.50 | hypothetical protein                                                                             |
| TERG_01156 | -1.54 | -1.72 | integral membrane protein ( <i>T. equinum</i> )                                                  |
| TERG_01325 | -1.58 | -2.50 | hypothetical protein                                                                             |
| TERG_06603 | -1.59 | -1.77 | hypothetical protein                                                                             |
| TERG_06889 | -1.61 | -1.72 | cystathionine gamma-synthase ( <i>T. tonsurans</i> )                                             |
| TERG_03597 | -1.63 | -1.77 | integral membrane protein ( <i>T. tonsurans</i> )                                                |
| TERG_03279 | -1.64 | -2.38 | C6 finger domain-containing protein ( <i>T. tonsurans</i> )                                      |
| TERG_07501 | -1.65 | -2.42 | nitrate reductase ( <i>T. tonsurans</i> )                                                        |
| TERG_02545 | -1.68 | -2.30 | MFS monocarboxylate transporter ( <i>T. equinum</i> )                                            |
| TERG_04339 | -1.69 | -2.06 | signal transduction protein Syg1, putative ( <i>A. benhamiae</i> )                               |
| TERG_00041 | -1.74 | -1.74 | hypothetical protein                                                                             |
| TERG_01299 | -1.79 | -1.81 | DUF1613 domain-containing protein ( <i>T. equinum</i> )                                          |

## Supplementary Material

|            |       |       |                                                                             |
|------------|-------|-------|-----------------------------------------------------------------------------|
| TERG_06801 | -1.83 | -1.83 | cyclic nucleotide-binding domain-containing protein ( <i>T. tonsurans</i> ) |
| TERG_07161 | -1.85 | -1.86 | hypothetical protein                                                        |
| TERG_01018 | -1.86 | -2.63 | monooxygenase, putative ( <i>A. benhamiae</i> )                             |
| TERG_01727 | -1.91 | -1.97 | short-chain dehydrogenase ( <i>T. equinum</i> )                             |
| TERG_07716 | -1.92 | -1.76 | hypothetical protein                                                        |
| TERG_03226 | -1.94 | -2.08 | glucosamine-6-phosphate deaminase                                           |
| TERG_08059 | -1.94 | -1.86 | sugar transporter ( <i>T. equinum</i> )                                     |
| TERG_08436 | -2.00 | -1.50 | hypothetical protein                                                        |
| TERG_03593 | -2.06 | -1.96 | hypothetical protein                                                        |
| TERG_02705 | -2.11 | -2.98 | class III chitinase ( <i>T. tonsurans</i> )                                 |
| TERG_08787 | -2.22 | -3.03 | aminotransferase ( <i>T. tonsurans</i> )                                    |
| TERG_07984 | -2.27 | -2.78 | hypothetical protein                                                        |
| TERG_03221 | -2.30 | -2.18 | C6 transcription factor, putative ( <i>A. benhamiae</i> )                   |
| TERG_11958 | -2.39 | -3.07 | superoxide dismutase copper chaperone Lys7 ( <i>T. tonsurans</i> )          |
| TERG_11964 | -2.43 | -2.59 | C6 transcription factor, putative ( <i>T. verrucosum</i> )                  |
| TERG_00479 | -2.54 | -3.13 | hypothetical protein                                                        |
| TERG_12233 | -2.57 | -2.71 | hypothetical protein                                                        |
| TERG_06276 | -2.58 | -2.36 | chromate ion transporter ( <i>T. tonsurans</i> )                            |
| TERG_01480 | -2.93 | -2.07 | MFS multidrug transporter, putative ( <i>A. benhamiae</i> )                 |
| TERG_01581 | -3.03 | -3.26 | MFS multidrug transporter ( <i>T. equinum</i> )                             |
| TERG_00172 | -3.06 | -3.01 | hypothetical protein                                                        |
| TERG_03223 | -3.10 | -3.04 | N-acetylglucosamine-6-phosphate deacetylase                                 |
| TERG_05652 | -3.31 | -3.15 | leucine aminopeptidase 1                                                    |
| TERG_12566 | -3.60 | -3.64 | hypothetical protein                                                        |

Gene expression values are expressed in log<sub>2</sub> fold change.

| ID         | 24 hours | 48 hours | 96 hours | Gene Product Name                                                   |
|------------|----------|----------|----------|---------------------------------------------------------------------|
| TERG_07028 | 7.30     |          | 2.55     | hypothetical protein                                                |
| TERG_08503 | 3.35     |          | 2.49     | secalin ( <i>M. canis</i> )                                         |
| TERG_08353 | 3.20     |          | 2.41     | cytochrome P450 55A3 ( <i>T. tonsurans</i> )                        |
| TERG_02583 | 3.13     |          | 1.57     | phosphate permease ( <i>A. benhamiae</i> )                          |
| TERG_05091 | 2.59     |          | 2.79     | DUF636 domain-containing protein ( <i>T. equinum</i> )              |
| TERG_06690 | 2.46     |          | 2.32     | RTA1 domain protein, putative ( <i>A. benhamiae</i> )               |
| TERG_01979 | 2.35     |          | 1.74     | pirin domain protein, putative ( <i>A. benhamiae</i> )              |
| TERG_02384 | 1.95     |          | 2.31     | hypothetical protein                                                |
| TERG_03179 | 1.89     |          | -1.78    | NlpC/P60-like cell-wall peptidase, putative ( <i>A. benhamiae</i> ) |
| TERG_06870 | 1.87     |          | 3.20     | heat shock protein ( <i>T. tonsurans</i> )                          |
| TERG_01352 | 1.78     |          | 1.95     | benzoate 4-monooxygenase cytochrome P450 ( <i>T. equinum</i> )      |
| TERG_03070 | 1.77     |          | 1.85     | flotillin domain-containing protein ( <i>T. equinum</i> )           |
| TERG_06675 | 1.75     |          | 1.62     | GliK protein ( <i>T. equinum</i> )                                  |
| TERG_07973 | 1.74     |          | 3.76     | CORD and CS domain-containing protein ( <i>T. tonsurans</i> )       |

|            |       |       |                                                                       |
|------------|-------|-------|-----------------------------------------------------------------------|
| TERG_03730 | 1.63  | 1.70  | RTA1 domain-containing protein ( <i>T. equinum</i> )                  |
| TERG_07831 | 1.57  | 1.77  | GNAT family acetyltransferase, putative ( <i>T. verrucosum</i> )      |
| TERG_00162 | 1.56  | 1.56  | MFS multidrug transporter, putative ( <i>A. benhamiae</i> )           |
| TERG_04402 | 1.54  | 2.92  | glyceraldehyde-3-phosphate dehydrogenase                              |
| TERG_04744 | 1.52  | 3.90  | DNA damage-inducible protein 1 ( <i>T. equinum</i> )                  |
| TERG_07417 | -1.55 | -1.98 | hypothetical protein                                                  |
| TERG_08261 | -1.57 | -3.83 | glutamate decarboxylase                                               |
| TERG_02886 | -1.59 | -1.94 | hypothetical protein                                                  |
| TERG_00608 | -1.60 | -1.59 | hypothetical protein                                                  |
| TERG_12126 | -1.62 | -2.01 | hypothetical protein                                                  |
| TERG_00471 | -1.67 | -1.67 | hypothetical protein                                                  |
| TERG_08363 | -1.68 | -2.25 | tyrosinase ( <i>T. verrucosum</i> )                                   |
| TERG_03948 | -1.71 | -2.77 | hypothetical protein                                                  |
| TERG_00517 | -1.71 | -1.71 | hypothetical protein                                                  |
| TERG_06986 | -1.73 | -2.12 | exo-beta-1,3-glucanase, putative ( <i>A. benhamiae</i> )              |
| TERG_07798 | -1.74 | -1.62 | hypothetical protein                                                  |
| TERG_01518 | -1.81 | -1.86 | hypothetical protein                                                  |
| TERG_03544 | -1.84 | -1.55 | CMGC/RCK/MAK protein kinase                                           |
| TERG_07094 | -1.85 | -1.52 | hypothetical protein                                                  |
| TERG_06290 | -1.93 | -1.87 | hypothetical protein                                                  |
| TERG_00037 | -1.98 | -2.06 | CHY zinc finger domain containing protein ( <i>T. equinum</i> )       |
| TERG_06295 | -2.02 | -3.19 | C2H2 finger domain-containing protein ( <i>T. tonsurans</i> )         |
| TERG_01749 | -2.06 | -2.15 | hypothetical protein                                                  |
| TERG_02132 | -2.18 | -1.77 | 5-histidylcysteine sulfoxide synthase                                 |
| TERG_00569 | -2.30 | -1.78 | C2H2 finger domain protein, putative ( <i>A. benhamiae</i> )          |
| TERG_02371 | -2.36 | -2.19 | hypothetical protein                                                  |
| TERG_02134 | -2.40 | -3.48 | indoleamine 2,3-dioxygenase ( <i>T. equinum</i> )                     |
| TERG_01435 | -2.45 | -2.57 | flavin containing polyamine oxidase, putative ( <i>A. benhamiae</i> ) |
| TERG_01360 | -2.71 | -1.59 | C6 transcription factor, putative ( <i>T. verrucosum</i> )            |
| TERG_01490 | -2.82 | -3.42 | LysR family regulatory protein ( <i>M. gypseum</i> )                  |
| TERG_06242 | -3.67 | -3.14 | glucanase, putative ( <i>T. verrucosum</i> )                          |

Gene expression values are expressed in log<sub>2</sub> fold change.

| ID         | 24 hours | 48 hours | 96 hours | Gene Product Name                                                     |
|------------|----------|----------|----------|-----------------------------------------------------------------------|
| TERG_07357 |          | 7.63     | 4.69     | hypothetical protein                                                  |
| TERG_03060 |          | 4.05     | 3.25     | hypothetical protein                                                  |
| TERG_05139 |          | 3.03     | 2.56     | non ribosomal peptide synthase ( <i>T. equinum</i> )                  |
| TERG_03313 |          | 2.74     | 2.22     | fucose-specific lectin FleA ( <i>A. benhamiae</i> )                   |
| TERG_01802 |          | 2.56     | 2.53     | hypothetical protein                                                  |
| TERG_11506 |          | 2.56     | 1.93     | phosphoenolpyruvate carboxykinase [ATP]                               |
| TERG_03174 |          | 2.49     | 3.29     | MFS siderochrome iron transporter MirB ( <i>T. verrucosum</i> )       |
| TERG_01879 |          | 2.44     | 2.76     | hypothetical protein                                                  |
| TERG_11916 |          | 2.39     | 2.15     | nucleolus protein required for cell viability ( <i>T. tonsurans</i> ) |

|            |      |      |                                                                                         |
|------------|------|------|-----------------------------------------------------------------------------------------|
| TERG_12604 | 2.34 | 2.01 | hypothetical protein                                                                    |
| TERG_11915 | 2.31 | 2.13 | nucleolus protein required for cell viability ( <i>T. tonsurans</i> )                   |
| TERG_11505 | 2.27 | 1.87 | phosphoenolpyruvate carboxykinase [ATP]                                                 |
| TERG_11646 | 2.23 | 2.67 | hypothetical protein                                                                    |
| TERG_00499 | 2.21 | 5.11 | hypothetical protein                                                                    |
| TERG_12369 | 2.13 | 1.57 | MFS multidrug transporter ( <i>T. tonsurans</i> )                                       |
| TERG_04310 | 2.12 | 3.71 | alcohol dehydrogenase ( <i>T. tonsurans</i> )                                           |
| TERG_12370 | 2.01 | 1.71 | MFS multidrug transporter, putative ( <i>A. benhamiae</i> )                             |
| TERG_12601 | 2.00 | 3.49 | 4-coumarate-CoA ligase ( <i>T. tonsurans</i> )                                          |
| TERG_00535 | 1.97 | 1.98 | calcium-translocating P-type ATPase, PMCA-type                                          |
| TERG_03602 | 1.96 | 1.58 | Polysaccharide deacetylase ( <i>T. tonsurans</i> )                                      |
| TERG_11941 | 1.94 | 3.68 | MCAK-like kinesin ( <i>T. equinum</i> )                                                 |
| TERG_04994 | 1.92 | 1.86 | pre-rRNA-processing protein ESF1 ( <i>T. equinum</i> )                                  |
| TERG_03528 | 1.89 | 2.05 | cytochrome c                                                                            |
| TERG_01273 | 1.85 | 2.43 | alpha-1,2-mannosidase, putative subfamily ( <i>T. verrucosum</i> )                      |
| TERG_02611 | 1.81 | 1.61 | WD repeat protein ( <i>A. benhamiae</i> )                                               |
| TERG_00611 | 1.77 | 1.70 | para-aminobenzoate synthase PabaA ( <i>T. verrucosum</i> )                              |
| TERG_05242 | 1.76 | 1.83 | PUF6 ( <i>M. gypseum</i> )                                                              |
| TERG_07329 | 1.74 | 1.99 | TPR domain-containing protein ( <i>T. tonsurans</i> )                                   |
| TERG_07072 | 1.73 | 1.52 | ATP-dependent RNA helicase DRS1                                                         |
| TERG_11773 | 1.70 | 1.98 | hypothetical protein                                                                    |
| TERG_05434 | 1.69 | 1.75 | ribosome associated DnaJ chaperone Zuotin ( <i>T. equinum</i> )                         |
| TERG_00615 | 1.69 | 2.05 | HLH transcription factor, putative ( <i>A. benhamiae</i> )                              |
| TERG_02105 | 1.67 | 2.74 | hypothetical protein                                                                    |
| TERG_07595 | 1.66 | 2.24 | hypothetical protein                                                                    |
| TERG_01446 | 1.64 | 2.01 | GMP synthase [glutamine-hydrolyzing]                                                    |
| TERG_01703 | 1.61 | 3.19 | cytochrome P450 51 ( <i>T. equinum</i> )                                                |
| TERG_02956 | 1.60 | 1.61 | ATP-dependent RNA helicase MAK5 ( <i>T. tonsurans</i> )                                 |
| TERG_06917 | 1.60 | 1.68 | elongation factor G, mitochondrial                                                      |
| TERG_02107 | 1.59 | 1.89 | protein phosphatase type 1 complex subunit Hex2/Reg1, putative ( <i>T. verrucosum</i> ) |
| TERG_02278 | 1.59 | 1.98 | hypothetical protein                                                                    |
| TERG_03172 | 1.56 | 1.88 | sodium/phosphate symporter ( <i>T. tonsurans</i> )                                      |
| TERG_00385 | 1.56 | 1.77 | oxidoreductase ( <i>T. equinum</i> )                                                    |
| TERG_02788 | 1.55 | 1.62 | DNA-directed RNA polymerase I ( <i>T. tonsurans</i> )                                   |
| TERG_07934 | 1.55 | 2.81 | hypothetical protein                                                                    |
| TERG_07403 | 1.55 | 1.57 | U3 small nucleolar RNA-associated protein Utp11 ( <i>T. tonsurans</i> )                 |
| TERG_08545 | 1.53 | 3.44 | C-4 methyl sterol oxidase Erg25 ( <i>T. equinum</i> )                                   |
| TERG_08104 | 1.53 | 2.31 | potassium/sodium efflux P-type ATPase, fungal-type                                      |
| TERG_04425 | 1.53 | 1.86 | deoxyhypusine synthase                                                                  |
| TERG_03206 | 1.53 | 1.78 | hsp7-like protein                                                                       |
| TERG_07012 | 1.52 | 1.62 | rRNA 2'-O-methyltransferase fibrillar                                                   |
| TERG_12664 | 1.52 | 1.78 | adenosine deaminase ( <i>T. tonsurans</i> )                                             |



|            |       |       |                                                                                            |
|------------|-------|-------|--------------------------------------------------------------------------------------------|
| TERG_08066 | 1.51  | 1.84  | STE/STE7 protein kinase                                                                    |
| TERG_11641 | 1.50  | 1.58  | forkhead transcription factor ( <i>T. tonsurans</i> )                                      |
| TERG_05909 | -1.50 | -1.65 | hypothetical protein                                                                       |
| TERG_03714 | -1.50 | -1.59 | NCS1 nucleoside transporter ( <i>T. tonsurans</i> )                                        |
| TERG_12524 | -1.51 | -2.37 | fatty acid oxygenase ( <i>T. tonsurans</i> )                                               |
| TERG_06199 | -1.52 | -1.91 | lipase ( <i>T. tonsurans</i> )                                                             |
| TERG_01197 | -1.52 | -1.56 | nitrilase ( <i>T. tonsurans</i> )                                                          |
| TERG_06177 | -1.52 | -2.37 | mitochondrial carrier protein, putative ( <i>T. verrucosum</i> )                           |
| TERG_01551 | -1.53 | -1.51 | hypothetical protein                                                                       |
| TERG_04605 | -1.53 | -1.84 | progesterone binding protein ( <i>T. tonsurans</i> )                                       |
| TERG_00702 | -1.54 | -2.46 | hypothetical protein                                                                       |
| TERG_12613 | -1.55 | -2.30 | succinyl-CoA synthetase beta subunit, putative ( <i>A. benhamiae</i> )                     |
| TERG_12498 | -1.56 | -1.74 | 2-deoxy-D-gluconate 3-dehydrogenase ( <i>T. equinum</i> )                                  |
| TERG_02481 | -1.56 | -1.55 | F-box domain-containing protein ( <i>M. canis</i> )                                        |
| TERG_02336 | -1.56 | -2.40 | hypothetical protein                                                                       |
| TERG_06944 | -1.57 | -1.65 | guanyl-specific ribonuclease Th1                                                           |
| TERG_04232 | -1.58 | -2.86 | 2-nitropropane dioxygenase ( <i>T. equinum</i> )                                           |
| TERG_05895 | -1.58 | -2.30 | MFS transporter ( <i>M. canis</i> )                                                        |
| TERG_06234 | -1.59 | -1.61 | 2,5-diketo-D-gluconic acid reductase A ( <i>T. equinum</i> )                               |
| TERG_04389 | -1.60 | -2.53 | carnitiny-CoA dehydratase ( <i>T. tonsurans</i> )                                          |
| TERG_02249 | -1.62 | -1.69 | phenylacetyl-CoA ligase ( <i>T. tonsurans</i> )                                            |
| TERG_03483 | -1.62 | -2.79 | carnitine acetyl transferase ( <i>T. tonsurans</i> )                                       |
| TERG_03229 | -1.65 | -1.77 | hexokinase ( <i>T. tonsurans</i> )                                                         |
| TERG_00449 | -1.65 | -2.34 | mandelate racemase/muconate lactonizing enzyme family protein ( <i>T. equinum</i> )        |
| TERG_01259 | -1.66 | -1.65 | hypothetical protein                                                                       |
| TERG_03510 | -1.67 | -2.06 | peroxisomal membrane anchor protein, putative ( <i>A. benhamiae</i> )                      |
| TERG_08908 | -1.68 | -2.03 | hypothetical protein                                                                       |
| TERG_02380 | -1.69 | -1.69 | hypothetical protein                                                                       |
| TERG_08951 | -1.70 | -1.89 | hypothetical protein                                                                       |
| TERG_07691 | -1.70 | -1.86 | sterol carrier protein ( <i>T. tonsurans</i> )                                             |
| TERG_04837 | -1.71 | -1.97 | thioesterase ( <i>T. equinum</i> )                                                         |
| TERG_07214 | -1.72 | -2.10 | DlpA domain-containing protein ( <i>T. equinum</i> )                                       |
| TERG_00823 | -1.74 | -2.87 | rhamnolipids biosynthesis 3-oxoacyl-[acyl-carrier-protein] reductase ( <i>T. equinum</i> ) |
| TERG_11678 | -1.74 | -1.96 | solute carrier family 25 member 45 ( <i>M. gypseum</i> )                                   |
| TERG_04038 | -1.74 | -2.98 | acyl-CoA dehydrogenase ( <i>T. tonsurans</i> )                                             |
| TERG_01937 | -1.76 | -2.24 | short chain dehydrogenase ( <i>T. tonsurans</i> )                                          |
| TERG_11593 | -1.77 | -1.51 | carboxypeptidase Y, putative ( <i>A. benhamiae</i> )                                       |
| TERG_02993 | -1.77 | -2.13 | allergenic cerato-platanin Asp F13 ( <i>T. verrucosum</i> )                                |
| TERG_02615 | -1.78 | -2.75 | oxidoreductase, 2OG-Fe(II) oxygenase family, putative ( <i>A. benhamiae</i> )              |
| TERG_05224 | -1.78 | -1.70 | hypothetical protein                                                                       |
| TERG_01759 | -1.78 | -1.89 | peroxisome assembly protein 10 ( <i>T. equinum</i> )                                       |

## Supplementary Material

|            |       |       |                                                                                               |
|------------|-------|-------|-----------------------------------------------------------------------------------------------|
| TERG_05621 | -1.80 | -2.89 | short chain dehydrogenase/reductase family oxidoreductase, putative ( <i>A. benhamiae</i> )   |
| TERG_12697 | -1.82 | -2.25 | serine/threonine protein kinase ( <i>T. tonsurans</i> )                                       |
| TERG_05446 | -1.82 | -1.96 | sarcosine oxidase ( <i>T. equinum</i> )                                                       |
| TERG_03832 | -1.82 | -2.41 | enoyl-CoA hydratase/isomerase ( <i>T. equinum</i> )                                           |
| TERG_04427 | -1.83 | -1.66 | serine/threonine protein kinase                                                               |
| TERG_04213 | -1.85 | -2.90 | TAM domain methyltransferase ( <i>T. equinum</i> )                                            |
| TERG_07607 | -1.85 | -3.17 | hypothetical protein                                                                          |
| TERG_01134 | -1.87 | -1.63 | metalloprotease MEP1 ( <i>A. benhamiae</i> )                                                  |
| TERG_03212 | -1.88 | -2.00 | hypothetical protein                                                                          |
| TERG_01742 | -1.89 | -2.38 | hypothetical protein                                                                          |
| TERG_02350 | -1.89 | -1.52 | endochitinase ( <i>T. equinum</i> )                                                           |
| TERG_04303 | -1.89 | -2.65 | hypothetical protein                                                                          |
| TERG_06114 | -1.90 | -1.74 | hypothetical protein                                                                          |
| TERG_11639 | -1.90 | -2.50 | isocitrate lyase                                                                              |
| TERG_00254 | -1.91 | -2.29 | peroxisomal dehydratase ( <i>T. equinum</i> )                                                 |
| TERG_03881 | -1.92 | -3.00 | epoxide hydrolase ( <i>T. tonsurans</i> )                                                     |
| TERG_07874 | -1.94 | -2.13 | Ser/Thr protein phosphatase ( <i>M. canis</i> )                                               |
| TERG_02004 | -1.95 | -1.99 | ureidoglycolate hydrolase, putative ( <i>T. verrucosum</i> )                                  |
| TERG_04279 | -1.95 | -2.46 | YhhN domain-containing protein ( <i>T. tonsurans</i> )                                        |
| TERG_02902 | -1.96 | -1.61 | hypothetical protein                                                                          |
| TERG_04588 | -1.98 | -2.04 | phosphoribulokinase/uridine kinase ( <i>T. tonsurans</i> )                                    |
| TERG_07088 | -1.98 | -1.66 | glutamyl-tRNA(Gln) amidotransferase subunit A, putative ( <i>T. verrucosum</i> )              |
| TERG_01430 | -1.98 | -2.52 | hypothetical protein                                                                          |
| TERG_01463 | -1.99 | -2.06 | cytochrome c peroxidase ( <i>T. tonsurans</i> )                                               |
| TERG_06779 | -1.99 | -1.96 | hypothetical protein                                                                          |
| TERG_07352 | -2.02 | -2.85 | aldehyde reductase (AKR1), putative ( <i>T. verrucosum</i> )                                  |
| TERG_01784 | -2.04 | -2.94 | oxidoreductase, short-chain dehydrogenase/reductase family, putative ( <i>T. verrucosum</i> ) |
| TERG_06726 | -2.06 | -1.84 | O-methylsterigmatocystin oxidoreductase, putative ( <i>A. benhamiae</i> )                     |
| TERG_02728 | -2.10 | -1.68 | 3-hydroxyisobutyrate dehydrogenase                                                            |
| TERG_01233 | -2.12 | -3.00 | 3,2-trans-enoyl-CoA isomerase ( <i>T. equinum</i> )                                           |
| TERG_02912 | -2.12 | -1.91 | MFS transporter, putative ( <i>A. benhamiae</i> )                                             |
| TERG_05484 | -2.15 | -1.94 | acyl-CoA dehydrogenase ( <i>T. tonsurans</i> )                                                |
| TERG_01184 | -2.16 | -2.40 | fatty acid-binding protein ( <i>T. equinum</i> )                                              |
| TERG_11638 | -2.17 | -2.34 | isocitrate lyase                                                                              |
| TERG_01504 | -2.17 | -1.57 | hypothetical protein                                                                          |
| TERG_00570 | -2.17 | -2.41 | autophagy protein ( <i>T. equinum</i> )                                                       |
| TERG_04610 | -2.18 | -3.34 | hypothetical protein                                                                          |
| TERG_05111 | -2.18 | -1.75 | hypothetical protein                                                                          |
| TERG_03991 | -2.18 | -2.85 | phosphotransferase enzyme family protein ( <i>T. verrucosum</i> )                             |
| TERG_00587 | -2.19 | -2.23 | nuclear pore complex protein sonA ( <i>T. equinum</i> )                                       |
| TERG_04003 | -2.22 | -2.77 | AMP dependent CoA ligase ( <i>T. tonsurans</i> )                                              |

|            |       |       |                                                                                    |
|------------|-------|-------|------------------------------------------------------------------------------------|
| TERG_07215 | -2.22 | -1.78 | N-acetyltransferase family protein, putative ( <i>A. benhamiae</i> )               |
| TERG_00127 | -2.23 | -3.78 | secretory phospholipase A2 ( <i>T. tonsurans</i> )                                 |
| TERG_12028 | -2.25 | -1.92 | metallothionein family protein ( <i>T. equinum</i> )                               |
| TERG_02909 | -2.29 | -3.83 | acyl-CoA oxidase, putative ( <i>T. verrucosum</i> )                                |
| TERG_12298 | -2.33 | -2.24 | hypothetical protein                                                               |
| TERG_07721 | -2.39 | -2.97 | isopenicillin N-CoA epimerase ( <i>T. equinum</i> )                                |
| TERG_04414 | -2.41 | -3.33 | isoflavone reductase family protein (CipA), putative ( <i>A. benhamiae</i> )       |
| TERG_07982 | -2.42 | -2.44 | hypothetical protein                                                               |
| TERG_05843 | -2.46 | -2.40 | F-box domain-containing protein ( <i>T. equinum</i> )                              |
| TERG_11637 | -2.48 | -2.50 | isocitrate lyase                                                                   |
| TERG_08336 | -2.49 | -2.04 | MFS multidrug transporter, putative ( <i>A. benhamiae</i> )                        |
| TERG_12035 | -2.51 | -2.15 | NB-ARC and TPR domain protein ( <i>A. benhamiae</i> )                              |
| TERG_04721 | -2.54 | -1.80 | glutamate carboxypeptidase ( <i>T. equinum</i> )                                   |
| TERG_03254 | -2.56 | -4.78 | hypothetical protein                                                               |
| TERG_00801 | -2.56 | -3.45 | hypothetical protein                                                               |
| TERG_07796 | -2.56 | -3.08 | oxidoreductase, short-chain dehydrogenase/reductase family ( <i>A. benhamiae</i> ) |
| TERG_12029 | -2.58 | -2.62 | hypothetical protein                                                               |
| TERG_02722 | -2.62 | -1.59 | WSC domain containing protein ( <i>T. equinum</i> )                                |
| TERG_03305 | -2.67 | -3.03 | C-4 methylsterol oxidase ( <i>T. tonsurans</i> )                                   |
| TERG_02199 | -2.74 | -1.79 | glutamate carboxypeptidase ( <i>T. equinum</i> )                                   |
| TERG_06679 | -2.79 | -1.72 | MFS transporter, putative ( <i>A. benhamiae</i> )                                  |
| TERG_05816 | -2.81 | -2.07 | hypothetical protein                                                               |
| TERG_08523 | -2.84 | -2.81 | xylosidase, putative ( <i>A. benhamiae</i> )                                       |
| TERG_05239 | -2.87 | -1.94 | DNA polymerase POL4, putative ( <i>T. verrucosum</i> )                             |
| TERG_04066 | -2.93 | -3.60 | filamentation protein (Rhf1), putative ( <i>T. verrucosum</i> )                    |
| TERG_08614 | -2.96 | -4.74 | hypothetical protein                                                               |
| TERG_03448 | -3.13 | -2.87 | hypothetical protein                                                               |
| TERG_11892 | -3.29 | -3.95 | hypothetical protein                                                               |
| TERG_00233 | -3.84 | -2.40 | glyoxalase ( <i>T. tonsurans</i> )                                                 |
| TERG_02449 | -4.01 | -2.26 | phosphoadenosine phosphosulfate reductase                                          |
| TERG_00060 | -5.16 | -4.32 | GPI anchored cell wall protein, putative ( <i>A. benhamiae</i> )                   |
| TERG_00235 | -6.67 | -8.18 | hypothetical protein                                                               |

Gene expression values are expressed in log<sub>2</sub> fold change.

| ID         | 24 hours | 48 hours | 96 hours | Gene Product Name                                                                   |
|------------|----------|----------|----------|-------------------------------------------------------------------------------------|
| TERG_06585 | 8.28     | 6.71     | 4.87     | hypothetical protein                                                                |
| TERG_01915 | 6.06     | 4.95     | 2.99     | O-methyltransferase ( <i>A. benhamiae</i> )                                         |
| TERG_12594 | 5.01     | 5.33     | 3.34     | oxidoreductase, short-chain dehydrogenase/reductase family ( <i>T. verrucosum</i> ) |
| TERG_01917 | 4.57     | 3.66     | 2.30     | O-methyltransferase, putative ( <i>A. benhamiae</i> )                               |
| TERG_05442 | 4.56     | 3.05     | 2.09     | hypothetical protein                                                                |
| TERG_11528 | 4.55     | 3.97     | 3.23     | tenascin C ( <i>T. equinum</i> )                                                    |

## Supplementary Material

|            |      |      |                                                                                             |
|------------|------|------|---------------------------------------------------------------------------------------------|
| TERG_01914 | 4.44 | 4.10 | 2.53 trichodiene oxygenase ( <i>T. equinum</i> )                                            |
| TERG_11527 | 4.39 | 3.55 | 3.46 tenascin C ( <i>T. equinum</i> )                                                       |
| TERG_03345 | 4.17 | 6.11 | 3.13 hypothetical protein                                                                   |
| TERG_11526 | 4.08 | 3.70 | 3.53 tenascin C ( <i>T. equinum</i> )                                                       |
| TERG_00371 | 3.99 | 3.68 | 3.83 ferric-chelate reductase ( <i>T. tonsurans</i> )                                       |
| TERG_11747 | 3.74 | 3.30 | 3.53 hypothetical protein                                                                   |
| TERG_03707 | 3.69 | 2.54 | 2.59 geranylgeranyl diphosphate synthase, putative ( <i>A. benhamiae</i> )                  |
| TERG_08046 | 3.58 | 4.18 | 2.66 beta-lactamase ( <i>M. gypseum</i> )                                                   |
| TERG_06076 | 3.24 | 3.04 | 2.32 hypothetical protein                                                                   |
| TERG_01923 | 3.23 | 3.29 | 3.04 hypothetical protein                                                                   |
| TERG_00713 | 3.21 | 2.48 | 2.48 hypothetical protein                                                                   |
| TERG_03706 | 3.20 | 2.09 | 2.20 trichodiene oxygenase ( <i>T. equinum</i> )                                            |
| TERG_01912 | 3.19 | 2.70 | 4.02 MFS transporter ( <i>T. equinum</i> )                                                  |
| TERG_11711 | 3.18 | 3.51 | 2.94 hypothetical protein                                                                   |
| TERG_07847 | 2.93 | 2.26 | 1.94 hypothetical protein                                                                   |
| TERG_02412 | 2.91 | 2.22 | 2.98 HHE domain protein ( <i>T. verrucosum</i> )                                            |
| TERG_03274 | 2.74 | 2.84 | 2.28 ammonium transporter MepA ( <i>A. benhamiae</i> )                                      |
| TERG_12090 | 2.71 | 2.43 | 2.50 hypothetical protein                                                                   |
| TERG_06022 | 2.67 | 3.28 | 1.64 hypothetical protein                                                                   |
| TERG_04169 | 2.63 | 2.96 | 2.60 DUF829 domain protein (PaxU), putative ( <i>A. benhamiae</i> )                         |
| TERG_06767 | 2.62 | 2.52 | 1.62 aminopeptidase ( <i>T. tonsurans</i> )                                                 |
| TERG_05141 | 2.53 | 4.96 | 4.16 NCS1 nucleoside transporter ( <i>T. equinum</i> )                                      |
| TERG_11866 | 2.49 | 2.18 | 2.17 hypothetical protein                                                                   |
| TERG_07364 | 2.47 | 2.85 | 2.36 oxidoreductase, zinc-binding dehydrogenase family superfamily ( <i>T. verrucosum</i> ) |
| TERG_12532 | 2.40 | 3.45 | 2.20 hypothetical protein                                                                   |
| TERG_04960 | 2.20 | 3.95 | 3.24 glutathione S-transferase Ure2-like, putative ( <i>A. benhamiae</i> )                  |
| TERG_12627 | 2.18 | 2.34 | 1.99 C-5 sterol desaturase ( <i>T. equinum</i> )                                            |
| TERG_12125 | 2.15 | 1.91 | 2.22 hypothetical protein                                                                   |
| TERG_12626 | 2.12 | 2.42 | 1.99 C-5 sterol desaturase ( <i>T. equinum</i> )                                            |
| TERG_00694 | 2.07 | 1.87 | 2.85 glutamate 5-kinase                                                                     |
| TERG_03390 | 2.07 | 2.10 | 4.25 glutathione S-transferase ( <i>T. equinum</i> )                                        |
| TERG_05850 | 2.04 | 1.95 | 1.93 integral membrane protein ( <i>A. benhamiae</i> )                                      |
| TERG_07237 | 2.03 | 1.59 | 3.03 hsp90-like protein ( <i>T. equinum</i> )                                               |
| TERG_03791 | 2.03 | 2.83 | 3.95 NADH-ubiquinone oxidoreductase 20 kDa subunit ( <i>T. equinum</i> )                    |
| TERG_07220 | 2.02 | 2.71 | 1.81 hypothetical protein                                                                   |
| TERG_05260 | 2.02 | 1.66 | 1.99 general amidase GmdB ( <i>A. benhamiae</i> )                                           |
| TERG_01901 | 2.00 | 2.68 | 2.13 glycerol kinase                                                                        |
| TERG_07795 | 1.94 | 1.75 | 1.92 WSC domain protein, putative ( <i>A. benhamiae</i> )                                   |
| TERG_05124 | 1.93 | 2.55 | 2.44 gliotoxin biosynthesis protein GliK ( <i>T. verrucosum</i> )                           |
| TERG_11517 | 1.85 | 2.46 | 1.73 hypothetical protein                                                                   |
| TERG_01911 | 1.85 | 1.83 | 2.45 NmrA family protein ( <i>T. equinum</i> )                                              |
| TERG_12623 | 1.83 | 2.10 | 3.53 glutaredoxin domain-containing protein ( <i>T. equinum</i> )                           |

|            |       |       |       |                                                                                      |
|------------|-------|-------|-------|--------------------------------------------------------------------------------------|
| TERG_11814 | 1.80  | 1.56  | 1.56  | FAD dependent oxidoreductase, putative ( <i>A. benhamiae</i> )                       |
| TERG_12602 | 1.72  | 2.60  | 2.31  | 4-coumarate-CoA ligase ( <i>T. equinum</i> )                                         |
| TERG_06755 | 1.66  | 1.74  | 3.38  | C-8 sterol isomerase (Erg-1), putative ( <i>T. verrucosum</i> )                      |
| TERG_12392 | 1.66  | 1.57  | 1.84  | hypothetical protein                                                                 |
| TERG_01900 | 1.66  | 3.07  | 2.47  | aquaglyceroporin, putative ( <i>A. benhamiae</i> )                                   |
| TERG_00583 | 1.62  | 1.70  | 1.81  | hypothetical protein                                                                 |
| TERG_04516 | 1.61  | 2.33  | 1.77  | hypothetical protein                                                                 |
| TERG_07099 | 1.58  | 3.17  | 4.17  | hypothetical protein                                                                 |
| TERG_00205 | 1.56  | 1.88  | 2.21  | alpha-tubulin suppressor protein Aats1 ( <i>T. tonsurans</i> )                       |
| TERG_07661 | -1.52 | -1.83 | -1.91 | mannosylphosphate transferase ( <i>T. equinum</i> )                                  |
| TERG_03367 | -1.53 | -2.99 | -2.71 | hypothetical protein                                                                 |
| TERG_02368 | -1.54 | -1.95 | -3.15 | extracellular developmental signal biosynthesis protein FluG ( <i>A. benhamiae</i> ) |
| TERG_01272 | -1.54 | -1.85 | -1.58 | 2-methylcitrate synthase, mitochondrial                                              |
| TERG_12167 | -1.55 | -2.04 | -2.35 | deoxycytidylate deaminase ( <i>T. equinum</i> )                                      |
| TERG_05151 | -1.58 | -1.55 | -2.12 | hypothetical protein                                                                 |
| TERG_06355 | -1.58 | -3.16 | -1.87 | acetyltransferase, GNAT family ( <i>A. benhamiae</i> )                               |
| TERG_12166 | -1.59 | -2.04 | -2.49 | deoxycytidylate deaminase ( <i>T. equinum</i> )                                      |
| TERG_05439 | -1.59 | -1.61 | -1.98 | IMP-specific 5'-nucleotidase ( <i>T. equinum</i> )                                   |
| TERG_06196 | -1.63 | -1.71 | -1.80 | hypothetical protein                                                                 |
| TERG_05706 | -1.65 | -1.67 | -1.56 | hypothetical protein                                                                 |
| TERG_03148 | -1.66 | -1.91 | -1.67 | molybdenum cofactor sulfurase ( <i>T. equinum</i> )                                  |
| TERG_06233 | -1.67 | -3.15 | -1.57 | hypothetical protein                                                                 |
| TERG_02609 | -1.67 | -2.40 | -1.62 | actin patches distal protein 1 ( <i>T. equinum</i> )                                 |
| TERG_04793 | -1.67 | -1.51 | -1.60 | cyclin ( <i>T. tonsurans</i> )                                                       |
| TERG_05899 | -1.69 | -2.84 | -2.83 | ubiE/COQ5 methyltransferase, putative ( <i>A. benhamiae</i> )                        |
| TERG_01503 | -1.71 | -2.24 | -1.76 | DUF895 domain membrane protein ( <i>T. verrucosum</i> )                              |
| TERG_05456 | -1.71 | -2.54 | -2.29 | hypothetical protein                                                                 |
| TERG_08909 | -1.72 | -2.19 | -2.31 | hypothetical protein                                                                 |
| TERG_06992 | -1.75 | -1.90 | -1.92 | pyridine nucleotide-disulphide oxidoreductase ( <i>T. tonsurans</i> )                |
| TERG_04289 | -1.76 | -1.81 | -1.59 | hypothetical protein                                                                 |
| TERG_07238 | -1.76 | -1.73 | -2.34 | zinc-binding oxidoreductase, putative ( <i>A. benhamiae</i> )                        |
| TERG_08173 | -1.78 | -1.64 | -2.30 | C6 finger domain protein, putative ( <i>A. benhamiae</i> )                           |
| TERG_02913 | -1.78 | -2.17 | -1.66 | LIM domain protein ( <i>T. verrucosum</i> )                                          |
| TERG_11852 | -1.79 | -1.91 | -1.99 | glyoxalase family protein ( <i>T. verrucosum</i> )                                   |
| TERG_07963 | -1.79 | -2.02 | -2.65 | hypothetical protein                                                                 |
| TERG_12372 | -1.81 | -1.59 | -1.96 | multidrug resistance protein ( <i>T. tonsurans</i> )                                 |
| TERG_06261 | -1.81 | -2.13 | -2.40 | phosphoesterase ( <i>T. equinum</i> )                                                |
| TERG_07326 | -1.83 | -3.51 | -5.62 | glutathione S-transferase PARB ( <i>T. equinum</i> )                                 |
| TERG_02262 | -1.83 | -1.67 | -1.78 | NACHT and WD domain protein ( <i>T. verrucosum</i> )                                 |
| TERG_01194 | -1.83 | -3.67 | -3.59 | uracil DNA glycosylase ( <i>T. tonsurans</i> )                                       |
| TERG_07780 | -1.84 | -2.57 | -2.22 | hypothetical protein                                                                 |
| TERG_08709 | -1.86 | -3.06 | -4.28 | SesA protein ( <i>T. equinum</i> )                                                   |
| TERG_01433 | -1.87 | -1.94 | -2.57 | WD domain, G-beta repeat protein ( <i>A. benhamiae</i> )                             |
| TERG_00527 | -1.87 | -2.28 | -1.94 | hypothetical protein                                                                 |

## Supplementary Material

|            |       |       |       |                                                                  |
|------------|-------|-------|-------|------------------------------------------------------------------|
| TERG_05669 | -1.88 | -1.72 | -2.66 | homeobox transcription factor, putative ( <i>T. verrucosum</i> ) |
| TERG_05627 | -1.88 | -2.61 | -1.64 | LysM domain-containing protein ( <i>M. canis</i> )               |
| TERG_11541 | -1.88 | -2.10 | -1.97 | hypothetical protein                                             |
| TERG_08708 | -1.91 | -1.68 | -3.05 | SesA protein ( <i>T. equinum</i> )                               |
| TERG_05744 | -1.93 | -1.77 | -2.19 | GTP-binding protein EsdC ( <i>T. equinum</i> )                   |
| TERG_02589 | -1.96 | -1.58 | -2.60 | formamidase ( <i>T. equinum</i> )                                |
| TERG_05809 | -1.97 | -1.67 | -3.27 | hypothetical protein                                             |
| TERG_01657 | -1.97 | -2.27 | -2.93 | heat shock protein 30 ( <i>T. equinum</i> )                      |
| TERG_01733 | -1.98 | -2.37 | -2.23 | alcohol dehydrogenase, putative ( <i>T. verrucosum</i> )         |
| TERG_03537 | -1.99 | -2.02 | -1.90 | alpha/beta hydrolase ( <i>T. equinum</i> )                       |
| TERG_00995 | -1.99 | -1.83 | -1.79 | hypothetical protein                                             |
| TERG_08182 | -2.00 | -5.14 | -4.92 | hypothetical protein                                             |
| TERG_00349 | -2.02 | -2.48 | -1.53 | hypothetical protein                                             |
| TERG_03699 | -2.02 | -2.64 | -1.68 | hypothetical protein                                             |
| TERG_00483 | -2.03 | -2.94 | -3.65 | hypothetical protein                                             |
| TERG_06389 | -2.04 | -1.82 | -1.73 | AhpA protein ( <i>T. equinum</i> )                               |
| TERG_07597 | -2.05 | -2.18 | -1.76 | SOK1 ( <i>T. equinum</i> )                                       |
| TERG_12525 | -2.06 | -1.70 | -3.39 | fatty acid oxygenase ( <i>T. tonsurans</i> )                     |
| TERG_08178 | -2.08 | -1.99 | -3.17 | endoglucanase ( <i>T. equinum</i> )                              |
| TERG_03397 | -2.08 | -1.89 | -1.96 | hypothetical protein                                             |
| TERG_01902 | -2.09 | -1.94 | -2.31 | phosphotransferase ( <i>M. canis</i> )                           |
| TERG_03808 | -2.12 | -2.20 | -2.57 | hypothetical protein                                             |
| TERG_02650 | -2.13 | -2.03 | -3.05 | NmrA family protein ( <i>T. equinum</i> )                        |
| TERG_08174 | -2.14 | -2.19 | -2.74 | hypothetical protein                                             |
| TERG_00820 | -2.14 | -2.68 | -1.93 | MFS multidrug transporter, putative ( <i>A. benhamiae</i> )      |
| TERG_04421 | -2.15 | -2.12 | -2.07 | hypothetical protein                                             |
| TERG_02953 | -2.16 | -1.86 | -2.02 | hypothetical protein                                             |
| TERG_11511 | -2.16 | -2.66 | -2.28 | hypothetical protein                                             |
| TERG_01275 | -2.18 | -2.58 | -1.60 | hypothetical protein                                             |
| TERG_03662 | -2.19 | -2.67 | -3.32 | hypothetical protein                                             |
| TERG_03358 | -2.22 | -2.12 | -3.87 | hypothetical protein                                             |
| TERG_06285 | -2.24 | -1.58 | -1.70 | hypothetical protein                                             |
| TERG_12504 | -2.25 | -2.17 | -2.18 | MFS multidrug transporter ( <i>T. equinum</i> )                  |
| TERG_12654 | -2.28 | -2.53 | -2.12 | hypothetical protein                                             |
| TERG_05700 | -2.28 | -3.51 | -2.68 | hypothetical protein                                             |
| TERG_11806 | -2.30 | -3.51 | -3.00 | hypothetical protein                                             |
| TERG_01985 | -2.31 | -2.16 | -3.31 | hypothetical protein                                             |
| TERG_07039 | -2.32 | -2.09 | -1.74 | hypothetical protein                                             |
| TERG_02646 | -2.34 | -1.77 | -3.19 | hypothetical protein                                             |
| TERG_07960 | -2.37 | -2.52 | -3.51 | hypothetical protein                                             |
| TERG_12578 | -2.38 | -2.18 | -4.69 | PEP phosphonomutase ( <i>T. equinum</i> )                        |
| TERG_12503 | -2.40 | -2.25 | -1.76 | polyamine transporter 2                                          |
| TERG_02483 | -2.41 | -3.03 | -2.84 | hypothetical protein                                             |

|            |       |       |       |                                                                                       |
|------------|-------|-------|-------|---------------------------------------------------------------------------------------|
| TERG_04775 | -2.45 | -2.80 | -1.99 | beta-N-hexosaminidase, putative ( <i>A. benhamiae</i> )                               |
| TERG_00916 | -2.45 | -3.66 | -2.44 | MFS sugar permease, putative ( <i>A. benhamiae</i> )                                  |
| TERG_02649 | -2.46 | -2.65 | -4.10 | benzoate 4-monooxygenase cytochrome P450 ( <i>T. equinum</i> )                        |
| TERG_03019 | -2.50 | -2.24 | -3.07 | hypothetical protein                                                                  |
| TERG_02725 | -2.50 | -2.71 | -3.87 | hypothetical protein                                                                  |
| TERG_02493 | -2.51 | -2.42 | -3.26 | glyoxalase family protein ( <i>T. verrucosum</i> )                                    |
| TERG_00958 | -2.51 | -2.73 | -2.91 | amino acid permease ( <i>T. tonsurans</i> )                                           |
| TERG_05625 | -2.51 | -2.13 | -1.60 | class V chitinase, putative ( <i>T. verrucosum</i> )                                  |
| TERG_02263 | -2.58 | -2.44 | -2.89 | hypothetical protein                                                                  |
| TERG_02588 | -2.58 | -1.87 | -2.37 | hypothetical protein                                                                  |
| TERG_04867 | -2.58 | -1.77 | -1.63 | SAM and PH domain protein (Boi1), putative ( <i>A. benhamiae</i> )                    |
| TERG_08969 | -2.58 | -2.33 | -3.17 | cytosolic Cu/Zn superoxide dismutase, putative ( <i>A. benhamiae</i> )                |
| TERG_07907 | -2.61 | -2.46 | -1.84 | hypothetical protein                                                                  |
| TERG_02986 | -2.62 | -2.09 | -3.69 | hypothetical protein                                                                  |
| TERG_06929 | -2.63 | -3.78 | -2.11 | chitinase ( <i>T. equinum</i> )                                                       |
| TERG_11805 | -2.63 | -3.34 | -2.42 | hypothetical protein                                                                  |
| TERG_03885 | -2.65 | -3.88 | -2.57 | hypothetical protein                                                                  |
| TERG_02283 | -2.66 | -2.89 | -2.42 | MFS transporter, putative ( <i>T. verrucosum</i> )                                    |
| TERG_07135 | -2.68 | -2.69 | -2.82 | hypothetical protein                                                                  |
| TERG_04680 | -2.68 | -1.72 | -2.03 | hypothetical protein                                                                  |
| TERG_12022 | -2.69 | -1.74 | -2.77 | hypothetical protein                                                                  |
| TERG_01840 | -2.72 | -2.27 | -2.15 | carboxypeptidase S1 ( <i>T. equinum</i> )                                             |
| TERG_01904 | -2.77 | -2.64 | -2.77 | hypothetical protein                                                                  |
| TERG_05808 | -2.77 | -2.09 | -4.24 | hypothetical protein                                                                  |
| TERG_03661 | -2.79 | -2.11 | -2.49 | hypothetical protein                                                                  |
| TERG_06780 | -2.82 | -3.63 | -5.06 | hypothetical protein                                                                  |
| TERG_07673 | -2.83 | -2.73 | -2.29 | hypothetical protein                                                                  |
| TERG_02367 | -2.88 | -2.93 | -2.54 | hypothetical protein                                                                  |
| TERG_02169 | -2.89 | -4.65 | -4.54 | carboxylesterase, putative ( <i>A. benhamiae</i> )                                    |
| TERG_07669 | -2.91 | -2.10 | -1.66 | carnitine acetyl transferase ( <i>T. tonsurans</i> )                                  |
| TERG_01959 | -2.91 | -2.76 | -4.14 | RNA polymerase Rpb1 C-terminal repeat domain-containing protein ( <i>T. equinum</i> ) |
| TERG_05943 | -2.92 | -5.81 | -6.54 | aminotransferase, class III ( <i>T. verrucosum</i> )                                  |
| TERG_03728 | -2.92 | -2.70 | -3.89 | hypothetical protein                                                                  |
| TERG_08757 | -2.93 | -3.99 | -3.60 | hypothetical protein                                                                  |
| TERG_08444 | -2.95 | -5.59 | -5.20 | CipC protein ( <i>M. canis</i> )                                                      |
| TERG_06484 | -2.97 | -2.41 | -2.93 | MYB DNA-binding domain-containing protein ( <i>T. tonsurans</i> )                     |
| TERG_03732 | -2.97 | -4.89 | -5.09 | hypothetical protein                                                                  |
| TERG_04879 | -3.02 | -3.19 | -5.68 | hypothetical protein                                                                  |
| TERG_07927 | -3.05 | -2.39 | -3.31 | hypothetical protein                                                                  |
| TERG_03311 | -3.11 | -4.04 | -5.63 | hypothetical protein                                                                  |
| TERG_07909 | -3.11 | -2.73 | -4.17 | isochorismatase family hydrolase, putative ( <i>A. benhamiae</i> )                    |
| TERG_00819 | -3.12 | -2.77 | -4.64 | PE repeat family protein ( <i>T. verrucosum</i> )                                     |
| TERG_02369 | -3.13 | -2.78 | -3.03 | MFS transporter ( <i>T. tonsurans</i> )                                               |
| TERG_11640 | -3.16 | -3.43 | -2.75 | hypothetical protein                                                                  |

## Supplementary Material

|            |       |       |       |                                                                         |
|------------|-------|-------|-------|-------------------------------------------------------------------------|
| TERG_11630 | -3.17 | -3.13 | -2.48 | hypothetical protein                                                    |
| TERG_04742 | -3.18 | -3.44 | -4.15 | hypothetical protein                                                    |
| TERG_01950 | -3.19 | -3.95 | -3.52 | serine/threonine protein kinase ( <i>T. tonsurans</i> )                 |
| TERG_01336 | -3.20 | -3.21 | -3.06 | MFS transporter ( <i>T. equinum</i> )                                   |
| TERG_06890 | -3.29 | -2.66 | -2.50 | DUF636 domain protein ( <i>T. verrucosum</i> )                          |
| TERG_07923 | -3.34 | -2.78 | -2.76 | neutral amino acid permease ( <i>T. equinum</i> )                       |
| TERG_01981 | -3.35 | -4.49 | -4.35 | hypothetical protein                                                    |
| TERG_06296 | -3.41 | -2.65 | -3.34 | hypothetical protein                                                    |
| TERG_12321 | -3.49 | -4.10 | -3.74 | hypothetical protein                                                    |
| TERG_00135 | -3.49 | -2.96 | -3.16 | metalloreductase transmembrane component ( <i>T. equinum</i> )          |
| TERG_01193 | -3.50 | -3.03 | -2.59 | PRO41 protein ( <i>T. equinum</i> )                                     |
| TERG_07079 | -3.51 | -3.47 | -4.14 | C6 transcription factor, putative ( <i>T. verrucosum</i> )              |
| TERG_05659 | -3.64 | -3.98 | -3.97 | hypothetical protein                                                    |
| TERG_11895 | -3.67 | -3.65 | -5.07 | polyketide synthase ( <i>T. tonsurans</i> )                             |
| TERG_06267 | -3.81 | -2.45 | -3.19 | hypothetical protein                                                    |
| TERG_06807 | -3.85 | -4.62 | -4.81 | cutinase, putative ( <i>A. benhamiae</i> )                              |
| TERG_04543 | -3.85 | -3.24 | -2.51 | aminotransferase GliI ( <i>T. equinum</i> )                             |
| TERG_00911 | -3.90 | -4.46 | -4.79 | hypothetical protein                                                    |
| TERG_04282 | -3.99 | -4.79 | -4.05 | GPI ethanolamine phosphate transferase ( <i>T. tonsurans</i> )          |
| TERG_03459 | -3.99 | -3.05 | -3.01 | GDSL Lipase/Acylhydrolase family protein ( <i>A. benhamiae</i> )        |
| TERG_01279 | -4.01 | -4.28 | -4.11 | flavin-binding monooxygenase ( <i>T. equinum</i> )                      |
| TERG_06854 | -4.05 | -4.88 | -3.90 | glutamine-serine-proline rich protein, putative ( <i>A. benhamiae</i> ) |
| TERG_06160 | -4.10 | -3.98 | -3.94 | nitrite reductase, copper-containing                                    |
| TERG_02365 | -4.13 | -4.45 | -2.81 | hypothetical protein                                                    |
| TERG_00714 | -4.19 | -4.07 | -4.67 | cell pattern formation-associated protein ( <i>T. tonsurans</i> )       |
| TERG_01599 | -4.42 | -4.41 | -4.41 | hypothetical protein                                                    |
| TERG_06651 | -4.59 | -4.75 | -3.29 | cytochrome P450, putative ( <i>T. verrucosum</i> )                      |
| TERG_06414 | -5.02 | -7.31 | -7.38 | DUF1338 domain-containing protein ( <i>T. equinum</i> )                 |
| TERG_04738 | -5.34 | -5.00 | -4.71 | hypothetical protein                                                    |
| TERG_06802 | -5.48 | -4.85 | -5.08 | hypothetical protein                                                    |

---

Gene expression values are expressed in log<sub>2</sub> fold change.



**Supplementary Table S6.** The GO terms overrepresented in differentially expressed genes obtained from the comparison between  $\Delta stuA$  versus wild-type ( $p$ -value < 0.05).

**24 hours (Glucose)**

| <b>Go term</b> | <b>Description</b>                               | <b>p-value</b> | <b>Class</b> | <b>Regulation</b> | <b>Genes</b> |
|----------------|--------------------------------------------------|----------------|--------------|-------------------|--------------|
| GO:0055114     | oxidation-reduction process                      | 0              | BP           | Down              | 39           |
| GO:0055085     | transmembrane transport                          | 0              | BP           | Down              | 22           |
| GO:0006357     | regulation of transcription by RNA polymerase II | 0.01           | BP           | Down              | 12           |
| GO:0032259     | methylation                                      | 0.02           | BP           | Down              | 12           |
| GO:0008152     | metabolic process                                | 0.02           | BP           | Down              | 7            |
| GO:0019752     | carboxylic acid metabolic process                | 0              | BP           | Down              | 5            |
| GO:0006807     | nitrogen compound metabolic process              | 0              | BP           | Down              | 4            |
| GO:0009820     | alkaloid metabolic process                       | 0.01           | BP           | Down              | 3            |
| GO:0019441     | tryptophan catabolic process to kynurenine       | 0              | BP           | Down              | 3            |
| GO:0035835     | indole alkaloid biosynthetic process             | 0              | BP           | Down              | 3            |
| GO:0006536     | glutamate metabolic process                      | 0              | BP           | Down              | 2            |
| GO:0006730     | one-carbon metabolic process                     | 0              | BP           | Down              | 2            |
| GO:0008654     | phospholipid biosynthetic process                | 0.01           | BP           | Down              | 2            |
| GO:0009072     | aromatic amino acid family metabolic process     | 0.01           | BP           | Down              | 2            |
| GO:0009086     | methionine biosynthetic process                  | 0.02           | BP           | Down              | 2            |
| GO:0019748     | secondary metabolic process                      | 0              | BP           | Down              | 2            |
| GO:0043386     | mycotoxin biosynthetic process                   | 0.02           | BP           | Down              | 2            |
| GO:0070941     | eisosome assembly                                | 0.01           | BP           | Down              | 2            |
| GO:0000096     | sulfur amino acid metabolic process              | 0.03           | BP           | Down              | 1            |
| GO:0005976     | polysaccharide metabolic process                 | 0.01           | BP           | Down              | 1            |
| GO:0005986     | sucrose biosynthetic process                     | 0.02           | BP           | Down              | 1            |
| GO:0006002     | fructose 6-phosphate metabolic process           | 0.03           | BP           | Down              | 1            |
| GO:0006013     | mannose metabolic process                        | 0.02           | BP           | Down              | 1            |
| GO:0006021     | inositol biosynthetic process                    | 0.02           | BP           | Down              | 1            |
| GO:0006542     | glutamine biosynthetic process                   | 0.03           | BP           | Down              | 1            |
| GO:0006571     | tyrosine biosynthetic process                    | 0.02           | BP           | Down              | 1            |
| GO:0009094     | L-phenylalanine biosynthetic process             | 0.04           | BP           | Down              | 1            |
| GO:0009264     | deoxyribonucleotide catabolic process            | 0.03           | BP           | Down              | 1            |
| GO:0015976     | carbon utilization                               | 0.02           | BP           | Down              | 1            |
| GO:0018105     | peptidyl-serine phosphorylation                  | 0.03           | BP           | Down              | 1            |
| GO:0018107     | peptidyl-threonine phosphorylation               | 0.01           | BP           | Down              | 1            |
| GO:0019381     | atrazine catabolic process                       | 0.04           | BP           | Down              | 1            |
| GO:0019499     | cyanide metabolic process                        | 0.01           | BP           | Down              | 1            |

## Supplementary Material

|            |                                                     |      |    |      |    |
|------------|-----------------------------------------------------|------|----|------|----|
| GO:0019500 | cyanide catabolic process                           | 0.03 | BP | Down | 1  |
| GO:0019510 | S-adenosylhomocysteine catabolic process            | 0.03 | BP | Down | 1  |
| GO:0019629 | propionate catabolic process, 2-methylcitrate cycle | 0.02 | BP | Down | 1  |
| GO:0030261 | chromosome condensation                             | 0.04 | BP | Down | 1  |
| GO:0030388 | fructose 1,6-bisphosphate metabolic process         | 0.01 | BP | Down | 1  |
| GO:0031124 | mRNA 3'-end processing                              | 0.02 | BP | Down | 1  |
| GO:0035837 | ergot alkaloid biosynthetic process                 | 0.02 | BP | Down | 1  |
| GO:0042276 | error-prone translesion synthesis                   | 0.02 | BP | Down | 1  |
| GO:0042744 | hydrogen peroxide catabolic process                 | 0.01 | BP | Down | 1  |
| GO:0044262 | cellular carbohydrate metabolic process             | 0.04 | BP | Down | 1  |
| GO:0045122 | aflatoxin biosynthetic process                      | 0.02 | BP | Down | 1  |
| GO:0045461 | sterigmatocystin biosynthetic process               | 0.01 | BP | Down | 1  |
| GO:0046294 | formaldehyde catabolic process                      | 0.02 | BP | Down | 1  |
| GO:0046386 | deoxyribose phosphate catabolic process             | 0.01 | BP | Down | 1  |
| GO:0046496 | nicotinamide nucleotide metabolic process           | 0.01 | BP | Down | 1  |
| GO:0046938 | phytochelatin biosynthetic process                  | 0.01 | BP | Down | 1  |
| GO:0051289 | protein homotetramerization                         | 0.02 | BP | Down | 1  |
| GO:0070814 | hydrogen sulfide biosynthetic process               | 0.02 | BP | Down | 1  |
| GO:0120029 | proton export across plasma membrane                | 0.04 | BP | Down | 1  |
| GO:0055085 | transmembrane transport                             | 0    | BP | Up   | 17 |
| GO:0008152 | metabolic process                                   | 0    | BP | Up   | 6  |
| GO:0009405 | pathogenesis                                        | 0.03 | BP | Up   | 5  |
| GO:0006865 | amino acid transport                                | 0    | BP | Up   | 3  |
| GO:0031505 | fungal-type cell wall organization                  | 0    | BP | Up   | 3  |
| GO:0006037 | cell wall chitin metabolic process                  | 0    | BP | Up   | 2  |
| GO:0016226 | iron-sulfur cluster assembly                        | 0    | BP | Up   | 2  |
| GO:0016573 | histone acetylation                                 | 0.01 | BP | Up   | 2  |
| GO:0043386 | mycotoxin biosynthetic process                      | 0.01 | BP | Up   | 2  |
| GO:0044550 | secondary metabolite biosynthetic process           | 0    | BP | Up   | 2  |
| GO:0071555 | cell wall organization                              | 0    | BP | Up   | 2  |
| GO:0002084 | protein depalmitoylation                            | 0.01 | BP | Up   | 1  |
| GO:0005992 | trehalose biosynthetic process                      | 0.03 | BP | Up   | 1  |
| GO:0006560 | proline metabolic process                           | 0.01 | BP | Up   | 1  |
| GO:0006562 | proline catabolic process                           | 0    | BP | Up   | 1  |
| GO:0006689 | ganglioside catabolic process                       | 0.03 | BP | Up   | 1  |
| GO:0006772 | thiamine metabolic process                          | 0.01 | BP | Up   | 1  |
| GO:0009229 | thiamine diphosphate biosynthetic process           | 0.04 | BP | Up   | 1  |

|            |                                                            |      |    |    |   |
|------------|------------------------------------------------------------|------|----|----|---|
| GO:0009313 | oligosaccharide catabolic process                          | 0.01 | BP | Up | 1 |
| GO:0009423 | chorismate biosynthetic process                            | 0.04 | BP | Up | 1 |
| GO:0009820 | alkaloid metabolic process                                 | 0.04 | BP | Up | 1 |
| GO:0016070 | RNA metabolic process                                      | 0.04 | BP | Up | 1 |
| GO:0017001 | antibiotic catabolic process                               | 0.04 | BP | Up | 1 |
| GO:0030435 | sporulation resulting in formation of a cellular spore     | 0.04 | BP | Up | 1 |
| GO:0032509 | endosome transport via multivesicular body sorting pathway | 0.03 | BP | Up | 1 |
| GO:0032981 | mitochondrial respiratory chain complex I assembly         | 0.03 | BP | Up | 1 |
| GO:0033609 | oxalate metabolic process                                  | 0.02 | BP | Up | 1 |
| GO:0034501 | protein localization to kinetochore                        | 0.01 | BP | Up | 1 |
| GO:0035434 | copper ion transmembrane transport                         | 0.01 | BP | Up | 1 |
| GO:0050482 | arachidonic acid secretion                                 | 0    | BP | Up | 1 |
| GO:0090481 | pyrimidine nucleotide-sugar transmembrane transport        | 0.04 | BP | Up | 1 |
| GO:0099116 | tRNA 5'-end processing                                     | 0.01 | BP | Up | 1 |
| GO:1902358 | sulfate transmembrane transport                            | 0.02 | BP | Up | 1 |

#### 48 hours (Glucose)

| Go term    | Description                                  | p-value | Class | Regulation | Genes |
|------------|----------------------------------------------|---------|-------|------------|-------|
| GO:0055114 | oxidation-reduction process                  | 0       | BP    | Down       | 64    |
| GO:0055085 | transmembrane transport                      | 0       | BP    | Down       | 33    |
| GO:0032259 | methylation                                  | 0       | BP    | Down       | 18    |
| GO:0008152 | metabolic process                            | 0.01    | BP    | Down       | 9     |
| GO:0006807 | nitrogen compound metabolic process          | 0.01    | BP    | Down       | 4     |
| GO:0009820 | alkaloid metabolic process                   | 0       | BP    | Down       | 4     |
| GO:0019752 | carboxylic acid metabolic process            | 0.01    | BP    | Down       | 4     |
| GO:0035835 | indole alkaloid biosynthetic process         | 0       | BP    | Down       | 4     |
| GO:0006979 | response to oxidative stress                 | 0.02    | BP    | Down       | 3     |
| GO:0042744 | hydrogen peroxide catabolic process          | 0       | BP    | Down       | 3     |
| GO:0007062 | sister chromatid cohesion                    | 0.01    | BP    | Down       | 2     |
| GO:0009072 | aromatic amino acid family metabolic process | 0.03    | BP    | Down       | 2     |
| GO:0019441 | tryptophan catabolic process to kynurenine   | 0.03    | BP    | Down       | 2     |
| GO:0019748 | secondary metabolic process                  | 0.01    | BP    | Down       | 2     |
| GO:0030245 | cellulose catabolic process                  | 0.02    | BP    | Down       | 2     |
| GO:0045132 | meiotic chromosome segregation               | 0       | BP    | Down       | 2     |
| GO:0000070 | mitotic sister chromatid segregation         | 0.04    | BP    | Down       | 1     |
| GO:0000302 | response to reactive oxygen species          | 0.04    | BP    | Down       | 1     |

## Supplementary Material

|            |                                                          |      |    |      |    |
|------------|----------------------------------------------------------|------|----|------|----|
| GO:0005976 | polysaccharide metabolic process                         | 0.03 | BP | Down | 1  |
| GO:0005991 | trehalose metabolic process                              | 0.04 | BP | Down | 1  |
| GO:0005993 | trehalose catabolic process                              | 0.03 | BP | Down | 1  |
| GO:0006021 | inositol biosynthetic process                            | 0.04 | BP | Down | 1  |
| GO:0006097 | glyoxylate cycle                                         | 0.04 | BP | Down | 1  |
| GO:0006562 | proline catabolic process                                | 0.03 | BP | Down | 1  |
| GO:0009168 | purine ribonucleoside monophosphate biosynthetic process | 0.02 | BP | Down | 1  |
| GO:0009264 | deoxyribonucleotide catabolic process                    | 0.01 | BP | Down | 1  |
| GO:0018107 | peptidyl-threonine phosphorylation                       | 0.03 | BP | Down | 1  |
| GO:0019500 | cyanide catabolic process                                | 0.02 | BP | Down | 1  |
| GO:0032264 | IMP salvage                                              | 0.03 | BP | Down | 1  |
| GO:0035672 | oligopeptide transmembrane transport                     | 0.02 | BP | Down | 1  |
| GO:0035837 | ergot alkaloid biosynthetic process                      | 0.03 | BP | Down | 1  |
| GO:0045461 | sterigmatocystin biosynthetic process                    | 0.04 | BP | Down | 1  |
| GO:0046294 | formaldehyde catabolic process                           | 0.03 | BP | Down | 1  |
| GO:0046386 | deoxyribose phosphate catabolic process                  | 0.02 | BP | Down | 1  |
| GO:0048312 | intracellular distribution of mitochondria               | 0.04 | BP | Down | 1  |
| GO:0051289 | protein homotetramerization                              | 0.04 | BP | Down | 1  |
| GO:0098863 | nuclear migration by microtubule mediated pushing forces | 0.03 | BP | Down | 1  |
| GO:0055085 | transmembrane transport                                  | 0    | BP | Up   | 31 |
| GO:0008152 | metabolic process                                        | 0.01 | BP | Up   | 8  |
| GO:0009405 | pathogenesis                                             | 0.02 | BP | Up   | 6  |
| GO:0042254 | ribosome biogenesis                                      | 0.03 | BP | Up   | 5  |
| GO:0006812 | cation transport                                         | 0    | BP | Up   | 4  |
| GO:0006865 | amino acid transport                                     | 0.02 | BP | Up   | 4  |
| GO:0000272 | polysaccharide catabolic process                         | 0    | BP | Up   | 3  |
| GO:0006367 | transcription initiation from RNA polymerase II promoter | 0    | BP | Up   | 3  |
| GO:0016042 | lipid catabolic process                                  | 0    | BP | Up   | 3  |
| GO:0031505 | fungus-type cell wall organization                       | 0    | BP | Up   | 3  |
| GO:0000027 | ribosomal large subunit assembly                         | 0.01 | BP | Up   | 2  |
| GO:0006031 | chitin biosynthetic process                              | 0    | BP | Up   | 2  |
| GO:0006032 | chitin catabolic process                                 | 0.02 | BP | Up   | 2  |
| GO:0006037 | cell wall chitin metabolic process                       | 0    | BP | Up   | 2  |
| GO:0006816 | calcium ion transport                                    | 0    | BP | Up   | 2  |
| GO:0009820 | alkaloid metabolic process                               | 0    | BP | Up   | 2  |

|            |                                                                                                                                                     |      |    |    |   |
|------------|-----------------------------------------------------------------------------------------------------------------------------------------------------|------|----|----|---|
| GO:0015074 | DNA integration                                                                                                                                     | 0.01 | BP | Up | 2 |
| GO:0016226 | iron-sulfur cluster assembly                                                                                                                        | 0    | BP | Up | 2 |
| GO:0019441 | tryptophan catabolic process to kynurenine                                                                                                          | 0    | BP | Up | 2 |
| GO:0043386 | mycotoxin biosynthetic process                                                                                                                      | 0.04 | BP | Up | 2 |
| GO:0044550 | secondary metabolite biosynthetic process                                                                                                           | 0    | BP | Up | 2 |
| GO:0070588 | calcium ion transmembrane transport                                                                                                                 | 0    | BP | Up | 2 |
| GO:0071555 | cell wall organization                                                                                                                              | 0.03 | BP | Up | 2 |
| GO:0098655 | cation transmembrane transport                                                                                                                      | 0.02 | BP | Up | 2 |
| GO:0099132 | ATP hydrolysis coupled cation transmembrane transport                                                                                               | 0.04 | BP | Up | 2 |
| GO:0106074 | aminoacyl-tRNA metabolism involved in translational fidelity                                                                                        | 0.01 | BP | Up | 2 |
| GO:0000447 | endonucleolytic cleavage in ITS1 to separate SSU-rRNA from 5.8S rRNA and LSU-rRNA from tricistronic rRNA transcript (SSU-rRNA, 5.8S rRNA, LSU-rRNA) | 0.04 | BP | Up | 1 |
| GO:0000472 | endonucleolytic cleavage to generate mature 5'-end of SSU-rRNA from (SSU-rRNA, 5.8S rRNA, LSU-rRNA)                                                 | 0.03 | BP | Up | 1 |
| GO:0000480 | endonucleolytic cleavage in 5'-ETS of tricistronic rRNA transcript (SSU-rRNA, 5.8S rRNA, LSU-rRNA)                                                  | 0.04 | BP | Up | 1 |
| GO:0000917 | division septum assembly                                                                                                                            | 0.01 | BP | Up | 1 |
| GO:0001172 | transcription, RNA-templated                                                                                                                        | 0.04 | BP | Up | 1 |
| GO:0001510 | RNA methylation                                                                                                                                     | 0.01 | BP | Up | 1 |
| GO:0005976 | polysaccharide metabolic process                                                                                                                    | 0    | BP | Up | 1 |
| GO:0006283 | transcription-coupled nucleotide-excision repair                                                                                                    | 0    | BP | Up | 1 |
| GO:0006400 | tRNA modification                                                                                                                                   | 0.04 | BP | Up | 1 |
| GO:0006429 | leucyl-tRNA aminoacylation                                                                                                                          | 0.02 | BP | Up | 1 |
| GO:0006560 | proline metabolic process                                                                                                                           | 0.01 | BP | Up | 1 |
| GO:0006562 | proline catabolic process                                                                                                                           | 0.01 | BP | Up | 1 |
| GO:0006725 | cellular aromatic compound metabolic process                                                                                                        | 0.02 | BP | Up | 1 |
| GO:0006749 | glutathione metabolic process                                                                                                                       | 0.04 | BP | Up | 1 |
| GO:0006750 | glutathione biosynthetic process                                                                                                                    | 0.01 | BP | Up | 1 |
| GO:0006751 | glutathione catabolic process                                                                                                                       | 0.04 | BP | Up | 1 |
| GO:0006817 | phosphate ion transport                                                                                                                             | 0.01 | BP | Up | 1 |
| GO:0006874 | cellular calcium ion homeostasis                                                                                                                    | 0.04 | BP | Up | 1 |
| GO:0007155 | cell adhesion                                                                                                                                       | 0.02 | BP | Up | 1 |
| GO:0007229 | integrin-mediated signaling pathway                                                                                                                 | 0.02 | BP | Up | 1 |
| GO:0008360 | regulation of cell shape                                                                                                                            | 0    | BP | Up | 1 |
| GO:0009098 | leucine biosynthetic process                                                                                                                        | 0.02 | BP | Up | 1 |

|            |                                                           |      |    |    |   |
|------------|-----------------------------------------------------------|------|----|----|---|
| GO:0009229 | thiamine diphosphate biosynthetic process                 | 0    | BP | Up | 1 |
| GO:0009272 | fungal-type cell wall biogenesis                          | 0.01 | BP | Up | 1 |
| GO:0009313 | oligosaccharide catabolic process                         | 0.02 | BP | Up | 1 |
| GO:0009712 | catechol-containing compound metabolic process            | 0.04 | BP | Up | 1 |
| GO:0016598 | protein arginylation                                      | 0    | BP | Up | 1 |
| GO:0031167 | rRNA methylation                                          | 0.02 | BP | Up | 1 |
| GO:0032220 | plasma membrane fusion involved in cytogamy               | 0.02 | BP | Up | 1 |
| GO:0032774 | RNA biosynthetic process                                  | 0.01 | BP | Up | 1 |
| GO:0043666 | regulation of phosphoprotein phosphatase activity         | 0.04 | BP | Up | 1 |
| GO:0045048 | protein insertion into ER membrane                        | 0.01 | BP | Up | 1 |
| GO:0051607 | defense response to virus                                 | 0    | BP | Up | 1 |
| GO:0051666 | actin cortical patch localization                         | 0.01 | BP | Up | 1 |
| GO:0071467 | cellular response to pH                                   | 0.01 | BP | Up | 1 |
| GO:0071816 | tail-anchored membrane protein insertion into ER membrane | 0    | BP | Up | 1 |
| GO:0090481 | pyrimidine nucleotide-sugar transmembrane transport       | 0.02 | BP | Up | 1 |
| GO:0098703 | calcium ion import across plasma membrane                 | 0.02 | BP | Up | 1 |
| GO:0099116 | tRNA 5'-end processing                                    | 0.01 | BP | Up | 1 |
| GO:1902358 | sulfate transmembrane transport                           | 0    | BP | Up | 1 |

## 96 hours (Glucose)

| Go term    | Description                                      | p-value | Class | Regulation | Genes |
|------------|--------------------------------------------------|---------|-------|------------|-------|
| GO:0055085 | transmembrane transport                          | 0.03    | BP    | Down       | 25    |
| GO:0006355 | regulation of transcription, DNA-templated       | 0       | BP    | Down       | 24    |
| GO:0006357 | regulation of transcription by RNA polymerase II | 0       | BP    | Down       | 19    |
| GO:0005975 | carbohydrate metabolic process                   | 0.01    | BP    | Down       | 11    |
| GO:0008152 | metabolic process                                | 0       | BP    | Down       | 9     |
| GO:0000272 | polysaccharide catabolic process                 | 0.01    | BP    | Down       | 4     |
| GO:0043386 | mycotoxin biosynthetic process                   | 0       | BP    | Down       | 4     |
| GO:0006807 | nitrogen compound metabolic process              | 0.04    | BP    | Down       | 3     |
| GO:0006865 | amino acid transport                             | 0.03    | BP    | Down       | 3     |
| GO:0008654 | phospholipid biosynthetic process                | 0.01    | BP    | Down       | 3     |
| GO:0030245 | cellulose catabolic process                      | 0       | BP    | Down       | 3     |
| GO:0070941 | eisosome assembly                                | 0       | BP    | Down       | 3     |
| GO:0006094 | gluconeogenesis                                  | 0.04    | BP    | Down       | 2     |
| GO:0006646 | phosphatidylethanolamine biosynthetic process    | 0       | BP    | Down       | 2     |

|            |                                                                                                            |      |    |      |   |
|------------|------------------------------------------------------------------------------------------------------------|------|----|------|---|
| GO:0016540 | protein autoprocesing                                                                                      | 0    | BP | Down | 2 |
| GO:0019344 | cysteine biosynthetic process                                                                              | 0.03 | BP | Down | 2 |
| GO:0019441 | tryptophan catabolic process to kynurenine                                                                 | 0.01 | BP | Down | 2 |
| GO:0019748 | secondary metabolic process                                                                                | 0    | BP | Down | 2 |
| GO:0000070 | mitotic sister chromatid segregation                                                                       | 0.02 | BP | Down | 1 |
| GO:0000096 | sulfur amino acid metabolic process                                                                        | 0.03 | BP | Down | 1 |
| GO:0005976 | polysaccharide metabolic process                                                                           | 0.04 | BP | Down | 1 |
| GO:0006075 | (1->3)-beta-D-glucan biosynthetic process                                                                  | 0.02 | BP | Down | 1 |
| GO:0006097 | glyoxylate cycle                                                                                           | 0.02 | BP | Down | 1 |
| GO:0006108 | malate metabolic process                                                                                   | 0.02 | BP | Down | 1 |
| GO:0006542 | glutamine biosynthetic process                                                                             | 0.03 | BP | Down | 1 |
| GO:0006560 | proline metabolic process                                                                                  | 0.02 | BP | Down | 1 |
| GO:0006561 | proline biosynthetic process                                                                               | 0.03 | BP | Down | 1 |
| GO:0006562 | proline catabolic process                                                                                  | 0.03 | BP | Down | 1 |
| GO:0006654 | phosphatidic acid biosynthetic process                                                                     | 0.03 | BP | Down | 1 |
| GO:0006857 | oligopeptide transport                                                                                     | 0.01 | BP | Down | 1 |
| GO:0007229 | integrin-mediated signaling pathway                                                                        | 0    | BP | Down | 1 |
| GO:0009094 | L-phenylalanine biosynthetic process                                                                       | 0.03 | BP | Down | 1 |
| GO:0009168 | purine ribonucleoside monophosphate biosynthetic process                                                   | 0.02 | BP | Down | 1 |
| GO:0015689 | molybdate ion transport                                                                                    | 0.02 | BP | Down | 1 |
| GO:0019379 | sulfate assimilation, phosphoadenylyl sulfate reduction by phosphoadenylyl-sulfate reductase (thioredoxin) | 0.04 | BP | Down | 1 |
| GO:0019500 | cyanide catabolic process                                                                                  | 0.02 | BP | Down | 1 |
| GO:0019629 | propionate catabolic process, 2-methylcitrate cycle                                                        | 0.04 | BP | Down | 1 |
| GO:0033609 | oxalate metabolic process                                                                                  | 0.02 | BP | Down | 1 |
| GO:0035835 | indole alkaloid biosynthetic process                                                                       | 0.04 | BP | Down | 1 |
| GO:0045132 | meiotic chromosome segregation                                                                             | 0.04 | BP | Down | 1 |
| GO:0045901 | positive regulation of translational elongation                                                            | 0.03 | BP | Down | 1 |
| GO:0048017 | inositol lipid-mediated signaling                                                                          | 0.04 | BP | Down | 1 |
| GO:0048312 | intracellular distribution of mitochondria                                                                 | 0.01 | BP | Down | 1 |
| GO:0051208 | sequestering of calcium ion                                                                                | 0.02 | BP | Down | 1 |
| GO:0051259 | protein complex oligomerization                                                                            | 0.02 | BP | Down | 1 |
| GO:0071596 | ubiquitin-dependent protein catabolic process via the N-end rule pathway                                   | 0.04 | BP | Down | 1 |
| GO:0071963 | establishment or maintenance of cell polarity regulating cell shape                                        | 0.04 | BP | Down | 1 |
| GO:0097623 | potassium ion export across plasma membrane                                                                | 0.03 | BP | Down | 1 |

## Supplementary Material

|            |                                                                             |      |    |      |   |
|------------|-----------------------------------------------------------------------------|------|----|------|---|
| GO:0098656 | anion transmembrane transport                                               | 0.03 | BP | Down | 1 |
| GO:0098863 | nuclear migration by microtubule mediated pushing forces                    | 0.03 | BP | Down | 1 |
| GO:0120029 | proton export across plasma membrane                                        | 0.02 | BP | Down | 1 |
| GO:1903087 | mitotic spindle pole body duplication                                       | 0.03 | BP | Down | 1 |
| GO:1903474 | anchoring of the mitotic actomyosin contractile ring to the plasma membrane | 0.04 | BP | Down | 1 |
| GO:0006508 | proteolysis                                                                 | 0.02 | BP | Up   | 7 |
| GO:0008150 | biological_process                                                          | 0.01 | BP | Up   | 7 |
| GO:0009405 | pathogenesis                                                                | 0.02 | BP | Up   | 3 |
| GO:0043386 | mycotoxin biosynthetic process                                              | 0    | BP | Up   | 3 |
| GO:0009116 | nucleoside metabolic process                                                | 0.02 | BP | Up   | 2 |
| GO:0046677 | response to antibiotic                                                      | 0    | BP | Up   | 2 |
| GO:0051607 | defense response to virus                                                   | 0    | BP | Up   | 2 |
| GO:0006048 | UDP-N-acetylglucosamine biosynthetic process                                | 0.03 | BP | Up   | 1 |
| GO:0006139 | nucleobase-containing compound metabolic process                            | 0.03 | BP | Up   | 1 |
| GO:0006189 | 'de novo' IMP biosynthetic process                                          | 0.04 | BP | Up   | 1 |
| GO:0006334 | nucleosome assembly                                                         | 0.03 | BP | Up   | 1 |
| GO:0006438 | valyl-tRNA aminoacylation                                                   | 0    | BP | Up   | 1 |
| GO:0006526 | arginine biosynthetic process                                               | 0.04 | BP | Up   | 1 |
| GO:0006689 | ganglioside catabolic process                                               | 0.01 | BP | Up   | 1 |
| GO:0007131 | reciprocal meiotic recombination                                            | 0    | BP | Up   | 1 |
| GO:0009313 | oligosaccharide catabolic process                                           | 0.02 | BP | Up   | 1 |
| GO:0009820 | alkaloid metabolic process                                                  | 0.02 | BP | Up   | 1 |
| GO:0009972 | cytidine deamination                                                        | 0    | BP | Up   | 1 |
| GO:0015940 | pantothenate biosynthetic process                                           | 0.02 | BP | Up   | 1 |
| GO:0016117 | carotenoid biosynthetic process                                             | 0.03 | BP | Up   | 1 |
| GO:0017001 | antibiotic catabolic process                                                | 0.01 | BP | Up   | 1 |
| GO:0019441 | tryptophan catabolic process to kynurenine                                  | 0.01 | BP | Up   | 1 |
| GO:0030091 | protein repair                                                              | 0.01 | BP | Up   | 1 |
| GO:0030435 | sporulation resulting in formation of a cellular spore                      | 0    | BP | Up   | 1 |
| GO:0044550 | secondary metabolite biosynthetic process                                   | 0    | BP | Up   | 1 |
| GO:0046416 | D-amino acid metabolic process                                              | 0.02 | BP | Up   | 1 |
| GO:0050688 | regulation of defense response to virus                                     | 0    | BP | Up   | 1 |

## 24 hours (Keratin)

| Go term | Description | p-value | Class | Regulation | Genes |
|---------|-------------|---------|-------|------------|-------|
|---------|-------------|---------|-------|------------|-------|



|            |                                                          |      |    |      |    |
|------------|----------------------------------------------------------|------|----|------|----|
| GO:0055085 | transmembrane transport                                  | 0    | BP | Down | 22 |
| GO:0005975 | carbohydrate metabolic process                           | 0    | BP | Down | 14 |
| GO:0006357 | regulation of transcription by RNA polymerase II         | 0.03 | BP | Down | 12 |
| GO:0008150 | biological_process                                       | 0.01 | BP | Down | 12 |
| GO:0008152 | metabolic process                                        | 0    | BP | Down | 12 |
| GO:0006351 | transcription, DNA-templated                             | 0    | BP | Down | 9  |
| GO:0000272 | polysaccharide catabolic process                         | 0    | BP | Down | 4  |
| GO:0006807 | nitrogen compound metabolic process                      | 0.01 | BP | Down | 3  |
| GO:0019441 | tryptophan catabolic process to kynurenine               | 0    | BP | Down | 3  |
| GO:0030001 | metal ion transport                                      | 0.03 | BP | Down | 3  |
| GO:0006032 | chitin catabolic process                                 | 0.01 | BP | Down | 2  |
| GO:0006044 | N-acetylglucosamine metabolic process                    | 0    | BP | Down | 2  |
| GO:0006801 | superoxide metabolic process                             | 0.02 | BP | Down | 2  |
| GO:0016042 | lipid catabolic process                                  | 0.04 | BP | Down | 2  |
| GO:0019752 | carboxylic acid metabolic process                        | 0    | BP | Down | 2  |
| GO:0070941 | eisosome assembly                                        | 0    | BP | Down | 2  |
| GO:0005976 | polysaccharide metabolic process                         | 0.02 | BP | Down | 1  |
| GO:0006190 | inosine salvage                                          | 0.02 | BP | Down | 1  |
| GO:0006428 | isoleucyl-tRNA aminoacylation                            | 0.03 | BP | Down | 1  |
| GO:0006542 | glutamine biosynthetic process                           | 0.03 | BP | Down | 1  |
| GO:0006571 | tyrosine biosynthetic process                            | 0.04 | BP | Down | 1  |
| GO:0007155 | cell adhesion                                            | 0.01 | BP | Down | 1  |
| GO:0009072 | aromatic amino acid family metabolic process             | 0.03 | BP | Down | 1  |
| GO:0009094 | L-phenylalanine biosynthetic process                     | 0.03 | BP | Down | 1  |
| GO:0009168 | purine ribonucleoside monophosphate biosynthetic process | 0.01 | BP | Down | 1  |
| GO:0010469 | regulation of signaling receptor activity                | 0.02 | BP | Down | 1  |
| GO:0015680 | intracellular copper ion transport                       | 0.01 | BP | Down | 1  |
| GO:0016052 | carbohydrate catabolic process                           | 0.03 | BP | Down | 1  |
| GO:0018344 | protein geranylgeranylation                              | 0    | BP | Down | 1  |
| GO:0019629 | propionate catabolic process, 2-methylcitrate cycle      | 0.02 | BP | Down | 1  |
| GO:0023014 | signal transduction by protein phosphorylation           | 0.04 | BP | Down | 1  |
| GO:0030261 | chromosome condensation                                  | 0.02 | BP | Down | 1  |
| GO:0031408 | oxylipin biosynthetic process                            | 0.03 | BP | Down | 1  |
| GO:0032264 | IMP salvage                                              | 0.02 | BP | Down | 1  |
| GO:0042128 | nitrate assimilation                                     | 0.04 | BP | Down | 1  |
| GO:0043085 | positive regulation of catalytic activity                | 0.04 | BP | Down | 1  |
| GO:0045461 | sterigmatocystin biosynthetic process                    | 0.03 | BP | Down | 1  |

## Supplementary Material

|            |                                                                        |      |    |      |    |
|------------|------------------------------------------------------------------------|------|----|------|----|
| GO:0046470 | phosphatidylcholine metabolic process                                  | 0    | BP | Down | 1  |
| GO:0051259 | protein complex oligomerization                                        | 0.03 | BP | Down | 1  |
| GO:0071592 | nicotinic acid riboside biosynthetic process                           | 0.04 | BP | Down | 1  |
| GO:0097428 | protein maturation by iron-sulfur cluster transfer                     | 0    | BP | Down | 1  |
| GO:0055114 | oxidation-reduction process                                            | 0    | BP | Up   | 38 |
| GO:0055085 | transmembrane transport                                                | 0    | BP | Up   | 17 |
| GO:0000226 | microtubule cytoskeleton organization                                  | 0    | BP | Up   | 3  |
| GO:0007020 | microtubule nucleation                                                 | 0    | BP | Up   | 3  |
| GO:0043386 | mycotoxin biosynthetic process                                         | 0    | BP | Up   | 3  |
| GO:0006096 | glycolytic process                                                     | 0.02 | BP | Up   | 2  |
| GO:0006464 | cellular protein modification process                                  | 0    | BP | Up   | 2  |
| GO:0006694 | steroid biosynthetic process                                           | 0    | BP | Up   | 2  |
| GO:0008610 | lipid biosynthetic process                                             | 0    | BP | Up   | 2  |
| GO:0098869 | cellular oxidant detoxification                                        | 0.02 | BP | Up   | 2  |
| GO:0000184 | nuclear-transcribed mRNA catabolic process,<br>nonsense-mediated decay | 0.04 | BP | Up   | 1  |
| GO:0006006 | glucose metabolic process                                              | 0.01 | BP | Up   | 1  |
| GO:0006048 | UDP-N-acetylglucosamine biosynthetic process                           | 0.01 | BP | Up   | 1  |
| GO:0006098 | pentose-phosphate shunt                                                | 0.01 | BP | Up   | 1  |
| GO:0006535 | cysteine biosynthetic process from serine                              | 0.01 | BP | Up   | 1  |
| GO:0006537 | glutamate biosynthetic process                                         | 0.02 | BP | Up   | 1  |
| GO:0006560 | proline metabolic process                                              | 0    | BP | Up   | 1  |
| GO:0006561 | proline biosynthetic process                                           | 0.01 | BP | Up   | 1  |
| GO:0006562 | proline catabolic process                                              | 0.02 | BP | Up   | 1  |
| GO:0006564 | L-serine biosynthetic process                                          | 0.01 | BP | Up   | 1  |
| GO:0006568 | tryptophan metabolic process                                           | 0.03 | BP | Up   | 1  |
| GO:0008202 | steroid metabolic process                                              | 0.02 | BP | Up   | 1  |
| GO:0015696 | ammonium transport                                                     | 0.01 | BP | Up   | 1  |
| GO:0017001 | antibiotic catabolic process                                           | 0.03 | BP | Up   | 1  |
| GO:0019343 | cysteine biosynthetic process via cystathionine                        | 0.01 | BP | Up   | 1  |
| GO:0019344 | cysteine biosynthetic process                                          | 0.03 | BP | Up   | 1  |
| GO:0019441 | tryptophan catabolic process to kynurenine                             | 0.04 | BP | Up   | 1  |
| GO:0032781 | positive regulation of ATPase activity                                 | 0.02 | BP | Up   | 1  |
| GO:0034220 | ion transmembrane transport                                            | 0.03 | BP | Up   | 1  |
| GO:0044550 | secondary metabolite biosynthetic process                              | 0.01 | BP | Up   | 1  |
| GO:0044571 | [2Fe-2S] cluster assembly                                              | 0    | BP | Up   | 1  |
| GO:0045332 | phospholipid translocation                                             | 0.04 | BP | Up   | 1  |

|            |                                         |      |    |    |   |
|------------|-----------------------------------------|------|----|----|---|
| GO:0045493 | xylan catabolic process                 | 0    | BP | Up | 1 |
| GO:0051382 | kinetochore assembly                    | 0.04 | BP | Up | 1 |
| GO:0072488 | ammonium transmembrane transport        | 0.01 | BP | Up | 1 |
| GO:0120113 | protein localization by the NVT pathway | 0.01 | BP | Up | 1 |

#### 48 hours (Keratin)

| Go term    | Description                            | p-value | Class | Regulation | Genes |
|------------|----------------------------------------|---------|-------|------------|-------|
| GO:0055114 | oxidation-reduction process            | 0       | BP    | Down       | 51    |
| GO:0055085 | transmembrane transport                | 0       | BP    | Down       | 32    |
| GO:0008150 | biological_process                     | 0.01    | BP    | Down       | 17    |
| GO:0005975 | carbohydrate metabolic process         | 0       | BP    | Down       | 14    |
| GO:0008152 | metabolic process                      | 0       | BP    | Down       | 10    |
| GO:0098869 | cellular oxidant detoxification        | 0       | BP    | Down       | 5     |
| GO:0000272 | polysaccharide catabolic process       | 0       | BP    | Down       | 4     |
| GO:0006979 | response to oxidative stress           | 0       | BP    | Down       | 4     |
| GO:0019752 | carboxylic acid metabolic process      | 0       | BP    | Down       | 4     |
| GO:0006032 | chitin catabolic process               | 0       | BP    | Down       | 3     |
| GO:0006807 | nitrogen compound metabolic process    | 0.02    | BP    | Down       | 3     |
| GO:0043386 | mycotoxin biosynthetic process         | 0       | BP    | Down       | 3     |
| GO:0070941 | eisosome assembly                      | 0       | BP    | Down       | 3     |
| GO:0001678 | cellular glucose homeostasis           | 0       | BP    | Down       | 2     |
| GO:0006044 | N-acetylglucosamine metabolic process  | 0       | BP    | Down       | 2     |
| GO:0006801 | superoxide metabolic process           | 0       | BP    | Down       | 2     |
| GO:0031408 | oxylipin biosynthetic process          | 0.01    | BP    | Down       | 2     |
| GO:0000737 | DNA catabolic process, endonucleolytic | 0.04    | BP    | Down       | 1     |
| GO:0005976 | polysaccharide metabolic process       | 0.04    | BP    | Down       | 1     |
| GO:0005991 | trehalose metabolic process            | 0.02    | BP    | Down       | 1     |
| GO:0006012 | galactose metabolic process            | 0.03    | BP    | Down       | 1     |
| GO:0006097 | glyoxylate cycle                       | 0.04    | BP    | Down       | 1     |
| GO:0006190 | inosine salvage                        | 0.04    | BP    | Down       | 1     |
| GO:0006421 | asparaginyl-tRNA aminoacylation        | 0.03    | BP    | Down       | 1     |
| GO:0006437 | tyrosyl-tRNA aminoacylation            | 0.03    | BP    | Down       | 1     |
| GO:0006797 | polyphosphate metabolic process        | 0.04    | BP    | Down       | 1     |
| GO:0006798 | polyphosphate catabolic process        | 0.03    | BP    | Down       | 1     |
| GO:0009063 | cellular amino acid catabolic process  | 0.04    | BP    | Down       | 1     |
| GO:0015680 | intracellular copper ion transport     | 0.02    | BP    | Down       | 1     |
| GO:0019594 | mannitol metabolic process             | 0.02    | BP    | Down       | 1     |

## Supplementary Material

|            |                                                        |      |    |      |    |
|------------|--------------------------------------------------------|------|----|------|----|
| GO:0032264 | IMP salvage                                            | 0.03 | BP | Down | 1  |
| GO:0046470 | phosphatidylcholine metabolic process                  | 0.01 | BP | Down | 1  |
| GO:0046952 | ketone body catabolic process                          | 0.02 | BP | Down | 1  |
| GO:0050482 | arachidonic acid secretion                             | 0.01 | BP | Down | 1  |
| GO:0051259 | protein complex oligomerization                        | 0.01 | BP | Down | 1  |
| GO:0071590 | nicotinamide riboside biosynthetic process             | 0.04 | BP | Down | 1  |
| GO:0055114 | oxidation-reduction process                            | 0    | BP | Up   | 41 |
| GO:0055085 | transmembrane transport                                | 0    | BP | Up   | 29 |
| GO:0032259 | methylation                                            | 0.04 | BP | Up   | 12 |
| GO:0006364 | rRNA processing                                        | 0    | BP | Up   | 9  |
| GO:0042254 | ribosome biogenesis                                    | 0    | BP | Up   | 8  |
| GO:0000226 | microtubule cytoskeleton organization                  | 0    | BP | Up   | 3  |
| GO:0007020 | microtubule nucleation                                 | 0.01 | BP | Up   | 3  |
| GO:0008610 | lipid biosynthetic process                             | 0    | BP | Up   | 3  |
| GO:0043386 | mycotoxin biosynthetic process                         | 0    | BP | Up   | 3  |
| GO:0006094 | gluconeogenesis                                        | 0    | BP | Up   | 2  |
| GO:0006561 | proline biosynthetic process                           | 0.01 | BP | Up   | 2  |
| GO:0006816 | calcium ion transport                                  | 0.01 | BP | Up   | 2  |
| GO:0008299 | isoprenoid biosynthetic process                        | 0.01 | BP | Up   | 2  |
| GO:0015936 | coenzyme A metabolic process                           | 0    | BP | Up   | 2  |
| GO:0019441 | tryptophan catabolic process to kynurenine             | 0.01 | BP | Up   | 2  |
| GO:0031145 | anaphase-promoting complex-dependent catabolic process | 0.02 | BP | Up   | 2  |
| GO:0070588 | calcium ion transmembrane transport                    | 0.04 | BP | Up   | 2  |
| GO:0006144 | purine nucleobase metabolic process                    | 0.01 | BP | Up   | 1  |
| GO:0006177 | GMP biosynthetic process                               | 0.03 | BP | Up   | 1  |
| GO:0006516 | glycoprotein catabolic process                         | 0.03 | BP | Up   | 1  |
| GO:0006517 | protein deglycosylation                                | 0.04 | BP | Up   | 1  |
| GO:0006817 | phosphate ion transport                                | 0.02 | BP | Up   | 1  |
| GO:0007531 | mating type determination                              | 0.04 | BP | Up   | 1  |
| GO:0008612 | peptidyl-lysine modification to peptidyl-hypusine      | 0.03 | BP | Up   | 1  |
| GO:0010133 | proline catabolic process to glutamate                 | 0.04 | BP | Up   | 1  |
| GO:0015696 | ammonium transport                                     | 0.01 | BP | Up   | 1  |
| GO:0017001 | antibiotic catabolic process                           | 0.03 | BP | Up   | 1  |
| GO:0019628 | urate catabolic process                                | 0.01 | BP | Up   | 1  |
| GO:0032933 | SREBP signaling pathway                                | 0.03 | BP | Up   | 1  |
| GO:0034217 | ascospore wall chitin biosynthetic process             | 0.02 | BP | Up   | 1  |

|            |                                                                                            |      |    |    |   |
|------------|--------------------------------------------------------------------------------------------|------|----|----|---|
| GO:0034356 | NAD biosynthesis via nicotinamide riboside salvage pathway                                 | 0.03 | BP | Up | 1 |
| GO:0036003 | positive regulation of transcription from RNA polymerase II promoter in response to stress | 0.04 | BP | Up | 1 |
| GO:0044571 | [2Fe-2S] cluster assembly                                                                  | 0.03 | BP | Up | 1 |
| GO:0045895 | positive regulation of mating-type specific transcription, DNA-templated                   | 0.03 | BP | Up | 1 |
| GO:0051570 | regulation of histone H3-K9 methylation                                                    | 0.01 | BP | Up | 1 |
| GO:0055129 | L-proline biosynthetic process                                                             | 0.02 | BP | Up | 1 |
| GO:0060548 | negative regulation of cell death                                                          | 0.04 | BP | Up | 1 |
| GO:0070125 | mitochondrial translational elongation                                                     | 0.03 | BP | Up | 1 |
| GO:0070868 | heterochromatin organization involved in chromatin silencing                               | 0.02 | BP | Up | 1 |
| GO:0070919 | production of siRNA involved in chromatin silencing by small RNA                           | 0.04 | BP | Up | 1 |
| GO:0071046 | nuclear polyadenylation-dependent ncRNA catabolic process                                  | 0.03 | BP | Up | 1 |
| GO:0071409 | cellular response to cycloheximide                                                         | 0.03 | BP | Up | 1 |
| GO:0072488 | ammonium transmembrane transport                                                           | 0.04 | BP | Up | 1 |
| GO:0120113 | protein localization by the NVT pathway                                                    | 0.01 | BP | Up | 1 |
| GO:1903474 | anchoring of the mitotic actomyosin contractile ring to the plasma membrane                | 0.02 | BP | Up | 1 |

### 96 hours (Keratin)

| Go term    | Description                                | p-value | Class | Regulation | Genes |
|------------|--------------------------------------------|---------|-------|------------|-------|
| GO:0055114 | oxidation-reduction process                | 0       | BP    | Down       | 60    |
| GO:0055085 | transmembrane transport                    | 0       | BP    | Down       | 40    |
| GO:0008150 | biological_process                         | 0.03    | BP    | Down       | 19    |
| GO:0005975 | carbohydrate metabolic process             | 0       | BP    | Down       | 18    |
| GO:0008152 | metabolic process                          | 0       | BP    | Down       | 17    |
| GO:0098869 | cellular oxidant detoxification            | 0       | BP    | Down       | 7     |
| GO:0006979 | response to oxidative stress               | 0       | BP    | Down       | 6     |
| GO:0000272 | polysaccharide catabolic process           | 0.01    | BP    | Down       | 4     |
| GO:0006099 | tricarboxylic acid cycle                   | 0.03    | BP    | Down       | 4     |
| GO:0019752 | carboxylic acid metabolic process          | 0.01    | BP    | Down       | 4     |
| GO:0019441 | tryptophan catabolic process to kynurenine | 0.01    | BP    | Down       | 3     |
| GO:0031408 | oxylipin biosynthetic process              | 0       | BP    | Down       | 3     |
| GO:0043386 | mycotoxin biosynthetic process             | 0.02    | BP    | Down       | 3     |
| GO:0001678 | cellular glucose homeostasis               | 0.01    | BP    | Down       | 2     |

## Supplementary Material

|            |                                                       |      |    |      |    |
|------------|-------------------------------------------------------|------|----|------|----|
| GO:0006032 | chitin catabolic process                              | 0.04 | BP | Down | 2  |
| GO:0006097 | glyoxylate cycle                                      | 0    | BP | Down | 2  |
| GO:0016558 | protein import into peroxisome matrix                 | 0    | BP | Down | 2  |
| GO:0016560 | protein import into peroxisome matrix, docking        | 0.01 | BP | Down | 2  |
| GO:0030259 | lipid glycosylation                                   | 0    | BP | Down | 2  |
| GO:0070941 | eisosome assembly                                     | 0.02 | BP | Down | 2  |
| GO:0001315 | age-dependent response to reactive oxygen species     | 0.02 | BP | Down | 1  |
| GO:0005976 | polysaccharide metabolic process                      | 0.03 | BP | Down | 1  |
| GO:0006689 | ganglioside catabolic process                         | 0.02 | BP | Down | 1  |
| GO:0009310 | amine catabolic process                               | 0.02 | BP | Down | 1  |
| GO:0009313 | oligosaccharide catabolic process                     | 0.04 | BP | Down | 1  |
| GO:0015833 | peptide transport                                     | 0.02 | BP | Down | 1  |
| GO:0019499 | cyanide metabolic process                             | 0.03 | BP | Down | 1  |
| GO:0019500 | cyanide catabolic process                             | 0.03 | BP | Down | 1  |
| GO:0019748 | secondary metabolic process                           | 0.04 | BP | Down | 1  |
| GO:0030242 | autophagy of peroxisome                               | 0.03 | BP | Down | 1  |
| GO:0032264 | IMP salvage                                           | 0.04 | BP | Down | 1  |
| GO:0071590 | nicotinamide riboside biosynthetic process            | 0.01 | BP | Down | 1  |
| GO:0055114 | oxidation-reduction process                           | 0    | BP | Up   | 47 |
| GO:0005975 | carbohydrate metabolic process                        | 0.04 | BP | Up   | 9  |
| GO:0006457 | protein folding                                       | 0    | BP | Up   | 9  |
| GO:0006364 | rRNA processing                                       | 0    | BP | Up   | 7  |
| GO:0006633 | fatty acid biosynthetic process                       | 0    | BP | Up   | 5  |
| GO:0008610 | lipid biosynthetic process                            | 0    | BP | Up   | 5  |
| GO:0006414 | translational elongation                              | 0.02 | BP | Up   | 4  |
| GO:0000226 | microtubule cytoskeleton organization                 | 0.01 | BP | Up   | 3  |
| GO:0000413 | protein peptidyl-prolyl isomerization                 | 0.03 | BP | Up   | 3  |
| GO:0006541 | glutamine metabolic process                           | 0.02 | BP | Up   | 3  |
| GO:0007018 | microtubule-based movement                            | 0.01 | BP | Up   | 3  |
| GO:0007020 | microtubule nucleation                                | 0    | BP | Up   | 3  |
| GO:0016126 | sterol biosynthetic process                           | 0    | BP | Up   | 3  |
| GO:0031505 | fungus-type cell wall organization                    | 0    | BP | Up   | 3  |
| GO:0042026 | protein refolding                                     | 0    | BP | Up   | 3  |
| GO:0071555 | cell wall organization                                | 0    | BP | Up   | 3  |
| GO:0099132 | ATP hydrolysis coupled cation transmembrane transport | 0.02 | BP | Up   | 3  |
| GO:0000054 | ribosomal subunit export from nucleus                 | 0.01 | BP | Up   | 2  |

|            |                                                                                                                                  |      |    |    |   |
|------------|----------------------------------------------------------------------------------------------------------------------------------|------|----|----|---|
| GO:0005978 | glycogen biosynthetic process                                                                                                    | 0    | BP | Up | 2 |
| GO:0006006 | glucose metabolic process                                                                                                        | 0    | BP | Up | 2 |
| GO:0006032 | chitin catabolic process                                                                                                         | 0.03 | BP | Up | 2 |
| GO:0006037 | cell wall chitin metabolic process                                                                                               | 0.01 | BP | Up | 2 |
| GO:0006207 | 'de novo' pyrimidine nucleobase biosynthetic process                                                                             | 0.04 | BP | Up | 2 |
| GO:0006334 | nucleosome assembly                                                                                                              | 0.01 | BP | Up | 2 |
| GO:0006450 | regulation of translational fidelity                                                                                             | 0.02 | BP | Up | 2 |
| GO:0006452 | translational frameshifting                                                                                                      | 0    | BP | Up | 2 |
| GO:0006515 | protein quality control for misfolded or incompletely synthesized proteins                                                       | 0.01 | BP | Up | 2 |
| GO:0006696 | ergosterol biosynthetic process                                                                                                  | 0.01 | BP | Up | 2 |
| GO:0008202 | steroid metabolic process                                                                                                        | 0.02 | BP | Up | 2 |
| GO:0031145 | anaphase-promoting complex-dependent catabolic process                                                                           | 0.03 | BP | Up | 2 |
| GO:0042759 | long-chain fatty acid biosynthetic process                                                                                       | 0    | BP | Up | 2 |
| GO:0051083 | 'de novo' cotranslational protein folding                                                                                        | 0    | BP | Up | 2 |
| GO:0070125 | mitochondrial translational elongation                                                                                           | 0    | BP | Up | 2 |
| GO:0000464 | endonucleolytic cleavage in ITS1 upstream of 5.8S rRNA from tricistronic rRNA transcript (SSU-rRNA, 5.8S rRNA, LSU-rRNA)         | 0.02 | BP | Up | 1 |
| GO:0000465 | exonucleolytic trimming to generate mature 5'-end of 5.8S rRNA from tricistronic rRNA transcript (SSU-rRNA, 5.8S rRNA, LSU-rRNA) | 0.02 | BP | Up | 1 |
| GO:0000959 | mitochondrial RNA metabolic process                                                                                              | 0.04 | BP | Up | 1 |
| GO:0006177 | GMP biosynthetic process                                                                                                         | 0.04 | BP | Up | 1 |
| GO:0006430 | lysyl-tRNA aminoacylation                                                                                                        | 0.04 | BP | Up | 1 |
| GO:0006437 | tyrosyl-tRNA aminoacylation                                                                                                      | 0.04 | BP | Up | 1 |
| GO:0006516 | glycoprotein catabolic process                                                                                                   | 0.03 | BP | Up | 1 |
| GO:0006517 | protein deglycosylation                                                                                                          | 0.04 | BP | Up | 1 |
| GO:0006561 | proline biosynthetic process                                                                                                     | 0.02 | BP | Up | 1 |
| GO:0006616 | SRP-dependent cotranslational protein targeting to membrane, translocation                                                       | 0.03 | BP | Up | 1 |
| GO:0006817 | phosphate ion transport                                                                                                          | 0.02 | BP | Up | 1 |
| GO:0008615 | pyridoxine biosynthetic process                                                                                                  | 0.02 | BP | Up | 1 |
| GO:0018293 | protein-FAD linkage                                                                                                              | 0.04 | BP | Up | 1 |
| GO:0019538 | protein metabolic process                                                                                                        | 0.01 | BP | Up | 1 |
| GO:0019551 | glutamate catabolic process to 2-oxoglutarate                                                                                    | 0.02 | BP | Up | 1 |
| GO:0019941 | modification-dependent protein catabolic process                                                                                 | 0.01 | BP | Up | 1 |
| GO:0031322 | ascospore-type prospore-specific spindle pole body remodeling                                                                    | 0.02 | BP | Up | 1 |

## Supplementary Material

|            |                                                                                            |      |    |    |   |
|------------|--------------------------------------------------------------------------------------------|------|----|----|---|
| GO:0032509 | endosome transport via multivesicular body sorting pathway                                 | 0.04 | BP | Up | 1 |
| GO:0032933 | SREBP signaling pathway                                                                    | 0.03 | BP | Up | 1 |
| GO:0032949 | regulation of alpha-glucan biosynthetic process                                            | 0.04 | BP | Up | 1 |
| GO:0032979 | protein insertion into mitochondrial membrane from inner side                              | 0.03 | BP | Up | 1 |
| GO:0035719 | tRNA import into nucleus                                                                   | 0.02 | BP | Up | 1 |
| GO:0036003 | positive regulation of transcription from RNA polymerase II promoter in response to stress | 0.02 | BP | Up | 1 |
| GO:0043335 | protein unfolding                                                                          | 0.02 | BP | Up | 1 |
| GO:0045984 | negative regulation of pyrimidine nucleobase metabolic process                             | 0.02 | BP | Up | 1 |
| GO:0060003 | copper ion export                                                                          | 0.03 | BP | Up | 1 |
| GO:0060548 | negative regulation of cell death                                                          | 0.02 | BP | Up | 1 |
| GO:0070370 | cellular heat acclimation                                                                  | 0.03 | BP | Up | 1 |
| GO:0070475 | rRNA base methylation                                                                      | 0.02 | BP | Up | 1 |
| GO:0071409 | cellular response to cycloheximide                                                         | 0.04 | BP | Up | 1 |
| GO:0071630 | nuclear protein quality control by the ubiquitin-proteasome system                         | 0    | BP | Up | 1 |
| GO:0120113 | protein localization by the NVT pathway                                                    | 0.03 | BP | Up | 1 |
| GO:0140021 | mitochondrial ADP transmembrane transport                                                  | 0.03 | BP | Up | 1 |

---



**Supplementary Table S7.** RNA sequencing vs. real-time quantitative reverse transcription polymerase chain reaction (qRT-PCR).

| <b>ID</b>  | <b>Condition(s)</b> | <b>RNA-Seq</b> | <b>qPCR</b>   | <b>Gene Product Name</b>                                                             |
|------------|---------------------|----------------|---------------|--------------------------------------------------------------------------------------|
| TERG_02307 | 24h G               | 2.35           | 1.67          | mitotic spindle checkpoint protein (Mad2B), putative ( <i>T. verrucosum</i> )        |
| TERG_11637 | 24h G               | -2.14          | -1.21         | isocitrate lyase                                                                     |
| TERG_07959 | 24h G / 96h K       | 2.23 / 3.01    | 1.95 / 0.96   | GPI-anchored cell wall beta-1,3-endoglucanase EglC ( <i>A. benhamiae</i> )           |
| TERG_06651 | 48h G / 96h K       | -1.62 / -3.29  | 1.81 / -0.36  | cytochrome P450, putative ( <i>T. verrucosum</i> )                                   |
| TERG_08114 | 48h G / 48h K       | 3.03 / 2.69    | 0.88 / 0.21   | anaphase-promoting complex component Cut20/Apc4 ( <i>T. tonsurans</i> )              |
| TERG_00060 | 96h G               | 3.30           | 0.33          | GPI anchored cell wall protein, putative ( <i>A. benhamiae</i> )                     |
| TERG_00119 | 96h G               | 1.61           | 5.73          | CAMK/CAMKL/GIN4 protein kinase                                                       |
| TERG_01840 | 96h G               | 3.01           | 1.90          | carboxypeptidase S1 ( <i>T. equinum</i> )                                            |
| TERG_01900 | 96h G / 96h K       | -2.21 / 2.47   | -2.37 / 1.93  | aquaglyceroporin, putative ( <i>A. benhamiae</i> )                                   |
| TERG_01901 | 96h G / 96h K       | -2.99 / 2.13   | -1.70 / 1.71  | glycerol kinase                                                                      |
| TERG_02368 | 96h G / 96h K       | -1.98 / -3.15  | -0.69 / -2.68 | extracellular developmental signal biosynthesis protein FluG ( <i>A. benhamiae</i> ) |
| TERG_03544 | 96h G / 96h K       | -3.13 / -1.55  | -2.25 / -1.64 | CMGC/RCK/MAK protein kinase                                                          |
| TERG_04282 | 96h G / 96h K       | -5.57 / -4.05  | -5.03 / -3.11 | GPI ethanolamine phosphate transferase ( <i>T. tonsurans</i> )                       |
| TERG_08261 | 96h G / 96h K       | -3.75 / -3.83  | -0.33 / -1.65 | glutamate decarboxylase                                                              |
| TERG_01950 | 96h K               | -3.52          | -2.28         | serine/threonine protein kinase ( <i>T. tonsurans</i> )                              |
| TERG_05627 | 96h K               | -1.64          | -6.69         | LysM domain-containing protein ( <i>M. canis</i> )                                   |

Gene expression values are expressed in log<sub>2</sub> fold change.
